# Supplementary material for: Sticky Genomes: Using NGS Evidence to Test Hybrid Speciation Hypotheses
Source: PLOS journal article supplement (doi:10.1371/journal.pone.0154911), 2016-05-17
Supplement: S7 (10.1371/journal.pone.0154911.s007) [file journal.pone.0154911.s007]

| No. | Seq. name             | Seq. decription                                                                                       | length | hits | min. eValue | sim. | Mean   |
|-----|-----------------------|-------------------------------------------------------------------------------------------------------|--------|------|-------------|------|--------|
| 1   | Cl_clus100005_Contig1 | ---NA---                                                                                              | 3307   | 0    | -           | -    |        |
| 2   | Cl_clus100003_Contig1 | ---NA---                                                                                              | 4010   | 0    | -           | -    |        |
| 3   | Cl_clus100006_Contig1 | ---NA---                                                                                              | 4638   | 0    | -           | -    |        |
| 4   | Cl_clus100007_Contig1 | ochotona princeps tyrosine 3-monooxygenase tryptophan 5-monooxygenase activation eta polypeptide mrna | 3611   | 3    | 6.40E-76    |      | 79.67% |
| 5   | Cl_clus100008_Contig1 | megachile rotundata twitchin-like mrna                                                                | 5264   | 2    | 0.00E+00    |      | 69.00% |
| 6   | Cl_clus100011_Contig1 | ---NA---                                                                                              | 2779   | 0    | -           | -    |        |
| 7   | Cl_clus100010_Contig1 | ---NA---                                                                                              | 3909   | 0    | -           | -    |        |
| 8   | Cl_clus100012_Contig1 | bos taurus isocitrate dehydrogenase 3 (nad+) beta transcript variant mrna                             | 3306   | 14   | 1.10E-91    |      | 72.86% |
| 9   | Cl_clus100013_Contig2 | ---NA---                                                                                              | 5697   | 0    | -           | -    |        |
| 10  | Cl_clus100009_Contig1 | ---NA---                                                                                              | 4559   | 0    | -           | -    |        |
| 11  | Cl_clus100014_Contig1 | ---NA---                                                                                              | 2473   | 0    | -           | -    |        |
| 12  | Cl_clus100015_Contig1 | ---NA---                                                                                              | 4223   | 0    | -           | -    |        |
| 13  | Cl_clus100016_Contig1 | ---NA---                                                                                              | 3147   | 0    | -           | -    |        |
| 14  | Cl_clus100017_Contig1 | ---NA---                                                                                              | 3448   | 0    | -           | -    |        |
| 15  | Cl_clus100018_Contig3 | ---NA---                                                                                              | 3232   | 0    | -           | -    |        |
| 16  | Cl_clus100019_Contig1 | ---NA---                                                                                              | 2943   | 0    | -           | -    |        |
| 17  | Cl_clus100020_Contig1 | megachile rotundata uncharacterized loc100883123 mrna                                                 | 2842   | 5    | 1.50E-44    |      | 80.00% |
| 18  | Cl_clus100021_Contig1 | gryllus bimaculatus gbcontig30509                                                                     | 2502   | 1    | 3.20E-122   |      | 72.00% |
| 19  | Cl_clus100022_Contig1 | ---NA---                                                                                              | 3375   | 0    | -           | -    |        |
| 20  | Cl_clus100024_Contig1 | drosophila pseudoobscura pseudoobscura ga21679 (dpse\ga21679) transcript variant mrna                 | 2011   | 9    | 0.00E+00    |      | 74.78% |
| 21  | Cl_clus100026_Contig1 | ---NA---                                                                                              | 3127   | 0    | -           | -    |        |
| 22  | Cl_clus100027_Contig1 | ---NA---                                                                                              | 2772   | 0    | -           | -    |        |
| 23  | Cl_clus100025_Contig1 | ---NA---                                                                                              | 2004   | 0    | -           | -    |        |
| 24  | Cl_clus100023_Contig1 | ---NA---                                                                                              | 3005   | 0    | -           | -    |        |
| 25  | Cl_clus100028_Contig1 | acontia aprica voucher aaca enolase protein partial cds                                               | 1556   | 20   | 0.00E+00    |      | 73.85% |
| 26  | Cl_clus100029_Contig1 | nomascus leucogenys tubulin alpha-1c chain-like mrna                                                  | 1428   | 20   | 0.00E+00    |      | 79.95% |
| 27  | Cl_clus100030_Contig1 | ---NA---                                                                                              | 4026   | 0    | -           | -    |        |
| 28  | Cl_clus100031_Contig1 | cavia porcellus oxoglutarate dehydrogenase-like transcript variant mrna                               | 3560   | 16   | 0.00E+00    |      | 71.38% |
| 29  | Cl_clus100032_Contig1 | ---NA---                                                                                              | 2627   | 0    | -           | -    |        |
| 30  | Cl_clus100034_Contig1 | ---NA---                                                                                              | 3066   | 0    | -           | -    |        |
| 31  | Cl_clus100036_Contig1 | ---NA---                                                                                              | 2568   | 0    | -           | -    |        |
| 32  | Cl_clus100037_Contig1 | ---NA---                                                                                              | 3128   | 0    | -           | -    |        |
| 33  | Cl_clus100033_Contig1 | ---NA---                                                                                              | 1958   | 0    | -           | -    |        |
| 34  | Cl_clus100039_Contig1 | salmo salar mrna for glutamate dehydrogenase ( gene)                                                  | 1844   | 20   | 0.00E+00    |      | 71.25% |
| 35  | Cl_clus100040_Contig1 | ---NA---                                                                                              | 1684   | 0    | -           | -    |        |
| 36  | Cl_clus100041_Contig1 | ---NA---                                                                                              | 2342   | 0    | -           | -    |        |
| 37  | Cl_clus100038_Contig1 | ---NA---                                                                                              | 2362   | 0    | -           | -    |        |
| 38  | Cl_clus100042_Contig1 | ---NA---                                                                                              | 1843   | 0    | -           | -    |        |
| 39  | Cl_clus100035_Contig1 | ---NA---                                                                                              | 2804   | 0    | -           | -    |        |
| 40  | Cl_clus100043_Contig1 | aedes aegypti mitochondrial partial mrna                                                              | 2923   | 15   | 0.00E+00    |      | 71.13% |
| 41  | Cl_clus100044_Contig1 | ---NA---                                                                                              | 2034   | 0    | -           | -    |        |
| 42  | Cl_clus100045_Contig1 | ---NA---                                                                                              | 1219   | 0    | -           | -    |        |
| 43  | Cl_clus100046_Contig1 | drosophila melanogaster paramyosin transcript variant mrna                                            | 1453   | 20   | 0.00E+00    |      | 76.75% |
| 44  | Cl_clus100047_Contig1 | ---NA---                                                                                              | 2053   | 0    | -           | -    |        |
| 45  | Cl_clus100048_Contig1 | ---NA---                                                                                              | 2433   | 0    | -           | -    |        |
| 46  | Cl_clus100049_Contig1 | schistocerca gregaria atp-synthase subunit beta complete cds                                          | 1988   | 20   | 0.00E+00    |      | 80.00% |
| 47  | Cl_clus100051_Contig1 | ---NA---                                                                                              | 2065   | 0    | -           | -    |        |
| 48  | Cl_clus100052_Contig1 | ---NA---                                                                                              | 2660   | 0    | -           | -    |        |
| 49  | Cl_clus100053_Contig1 | ---NA---                                                                                              | 3024   | 0    | -           | -    |        |
| 50  | Cl_clus100050_Contig1 | ---NA---                                                                                              | 1238   | 0    | -           | -    |        |
| 51  | Cl_clus100054_Contig1 | Dendroctonus ponderosae clone DPO0418_C01 unknown mRNA                                                | 1931   | 1    | 2.60E-71    |      | 71.00% |
| 52  | Cl_clus100055_Contig1 | gryllus bimaculatus gbcontig22796                                                                     | 2684   | 1    | 0.00E+00    |      | 79.00% |
| 53  | Cl_clus100056_Contig1 | ---NA---                                                                                              | 2057   | 0    | -           | -    |        |
| 54  | Cl_clus100057_Contig1 | ---NA---                                                                                              | 1861   | 0    | -           | -    |        |
| 55  | Cl_clus100058_Contig1 | ---NA---                                                                                              | 2169   | 0    | -           | -    |        |

|     |                       |                                                                                 |      |    |           |        |  |
|-----|-----------------------|---------------------------------------------------------------------------------|------|----|-----------|--------|--|
| 56  | Cl_clus100059_Contig1 | ---NA---                                                                        | 1382 | 0  | -         | -      |  |
| 57  | Cl_clus100060_Contig1 | agathemera crassa 18s ribosomal rna partial sequence                            | 1818 | 20 | 0.00E+00  | 98.75% |  |
| 58  | Cl_clus100061_Contig1 | helicoverpa armigera heat shock protein 90 complete cds                         | 2096 | 20 | 0.00E+00  | 76.60% |  |
| 59  | Cl_clus100062_Contig1 | ostrinia furnacalis strain acb- heat shock cognate 70 kda protein complete cds  | 2291 | 20 | 0.00E+00  | 78.35% |  |
| 60  | Cl_clus100063_Contig1 | ---NA---                                                                        | 1592 | 0  | -         | -      |  |
| 61  | Cl_clus100065_Contig1 | ---NA---                                                                        | 1098 | 0  | -         | -      |  |
| 62  | Cl_clus100066_Contig1 | ---NA---                                                                        | 2247 | 0  | -         | -      |  |
| 63  | Cl_clus100067_Contig1 | aedes aegypti clone ae-10233 pa26-t3 nuclear protein complete cds               | 2136 | 3  | 2.70E-65  | 73.00% |  |
| 64  | Cl_clus100068_Contig1 | ---NA---                                                                        | 1779 | 0  | -         | -      |  |
| 65  | Cl_clus100064_Contig1 | ---NA---                                                                        | 1274 | 0  | -         | -      |  |
| 66  | Cl_clus100069_Contig1 | aedes aegypti eukaryotic translation elongation factor partial mrna             | 2186 | 20 | 0.00E+00  | 76.90% |  |
| 67  | Cl_clus100070_Contig1 | tribolium castaneum darkener of apricot cg33553-pg mrna                         | 1636 | 2  | 2.90E-171 | 72.00% |  |
| 68  | Cl_clus100071_Contig1 | ---NA---                                                                        | 1787 | 0  | -         | -      |  |
| 69  | Cl_clus100072_Contig1 | ---NA---                                                                        | 1472 | 0  | -         | -      |  |
| 70  | Cl_clus100073_Contig2 | ---NA---                                                                        | 1704 | 0  | -         | -      |  |
| 71  | Cl_clus100074_Contig2 | ---NA---                                                                        | 2132 | 0  | -         | -      |  |
| 72  | Cl_clus100075_Contig1 | ---NA---                                                                        | 3215 | 0  | -         | -      |  |
| 73  | Cl_clus100076_Contig1 | ---NA---                                                                        | 2142 | 0  | -         | -      |  |
| 74  | Cl_clus100077_Contig1 | ---NA---                                                                        | 730  | 0  | -         | -      |  |
| 75  | Cl_clus100078_Contig1 | ---NA---                                                                        | 2341 | 0  | -         | -      |  |
| 76  | Cl_clus100079_Contig1 | ---NA---                                                                        | 1686 | 0  | -         | -      |  |
| 77  | Cl_clus100080_Contig1 | drosophila melanogaster alpha actinin transcript variant mrna                   | 2956 | 20 | 0.00E+00  | 79.35% |  |
| 78  | Cl_clus100081_Contig1 | ---NA---                                                                        | 1645 | 0  | -         | -      |  |
| 79  | Cl_clus100082_Contig1 | ---NA---                                                                        | 1105 | 0  | -         | -      |  |
| 80  | Cl_clus100083_Contig1 | drosophila persimilis gl12270 (dper\gl12270) mrna                               | 2064 | 1  | 3.90E-25  | 77.00% |  |
| 81  | Cl_clus100084_Contig1 | ---NA---                                                                        | 3487 | 0  | -         | -      |  |
| 82  | Cl_clus100086_Contig1 | ---NA---                                                                        | 1191 | 0  | -         | -      |  |
| 83  | Cl_clus100085_Contig1 | ---NA---                                                                        | 1566 | 0  | -         | -      |  |
| 84  | Cl_clus100087_Contig1 | ---NA---                                                                        | 2039 | 0  | -         | -      |  |
| 85  | Cl_clus100088_Contig1 | ---NA---                                                                        | 2337 | 0  | -         | -      |  |
| 86  | Cl_clus100089_Contig1 | ---NA---                                                                        | 1474 | 0  | -         | -      |  |
| 87  | Cl_clus100090_Contig1 | tribolium castaneum agap007135-pa mrna                                          | 1815 | 6  | 0.00E+00  | 78.50% |  |
| 88  | Cl_clus100091_Contig1 | ---NA---                                                                        | 1593 | 0  | -         | -      |  |
| 89  | Cl_clus100092_Contig1 | aedes aegypti troponin c partial mrna                                           | 848  | 16 | 7.60E-112 | 75.81% |  |
| 90  | Cl_clus100093_Contig2 | bacillus rossius 28s ribosomal rna partial sequence                             | 2358 | 20 | 0.00E+00  | 92.55% |  |
| 91  | Cl_clus100094_Contig1 | drosophila sechellia gm12981 (dsec\gm12981) mrna                                | 1441 | 3  | 8.30E-51  | 70.00% |  |
| 92  | Cl_clus100095_Contig1 | ---NA---                                                                        | 1061 | 0  | -         | -      |  |
| 93  | Cl_clus100096_Contig1 | ---NA---                                                                        | 1726 | 0  | -         | -      |  |
| 94  | Cl_clus100097_Contig1 | ---NA---                                                                        | 1224 | 0  | -         | -      |  |
| 95  | Cl_clus100098_Contig1 | ---NA---                                                                        | 1423 | 0  | -         | -      |  |
| 96  | Cl_clus100099_Contig1 | ---NA---                                                                        | 1363 | 0  | -         | -      |  |
| 97  | Cl_clus100100_Contig1 | ---NA---                                                                        | 1279 | 0  | -         | -      |  |
| 98  | Cl_clus100101_Contig1 | ---NA---                                                                        | 857  | 0  | -         | -      |  |
| 99  | Cl_clus100102_Contig1 | ---NA---                                                                        | 775  | 0  | -         | -      |  |
| 100 | Cl_clus100103_Contig1 | ---NA---                                                                        | 1427 | 0  | -         | -      |  |
| 101 | Cl_clus100104_Contig1 | ---NA---                                                                        | 848  | 0  | -         | -      |  |
| 102 | Cl_clus100105_Contig1 | pseudoclitarchus sentus isolate pse-231 28s ribosomal rna partial sequence      | 1146 | 20 | 0.00E+00  | 98.60% |  |
| 103 | Cl_clus100106_Contig1 | ---NA---                                                                        | 1538 | 0  | -         | -      |  |
| 104 | Cl_clus100107_Contig1 | culex quinquefasciatus mrna                                                     | 1578 | 20 | 6.90E-141 | 82.60% |  |
| 105 | Cl_clus100108_Contig1 | ---NA---                                                                        | 2021 | 0  | -         | -      |  |
| 106 | Cl_clus100109_Contig1 | rattus norvegicus high mobility group protein b1-like mrna                      | 1450 | 20 | 3.50E-68  | 70.25% |  |
| 107 | Cl_clus100111_Contig1 | ---NA---                                                                        | 1580 | 0  | -         | -      |  |
| 108 | Cl_clus100112_Contig1 | ---NA---                                                                        | 2316 | 0  | -         | -      |  |
| 109 | Cl_clus100113_Contig1 | drosophila melanogaster calcium atpase at 60a (ca-p60a) transcript variant mrna | 3178 | 20 | 0.00E+00  | 77.80% |  |
| 110 | Cl_clus100110_Contig1 | clitarchus hookeri isolate -2 28s ribosomal rna partial sequence                | 1068 | 20 | 0.00E+00  | 97.40% |  |
| 111 | Cl_clus100114_Contig1 | drosophila melanogaster elongation factor 1alpha48d transcript variant mrna     | 1906 | 20 | 0.00E+00  | 81.70% |  |

|     |                       |                                                                                                       |      |    |           |   |        |
|-----|-----------------------|-------------------------------------------------------------------------------------------------------|------|----|-----------|---|--------|
| 112 | Cl_clus100115_Contig1 | ---NA---                                                                                              | 1343 | 0  | -         | - |        |
| 113 | Cl_clus100116_Contig1 | ---NA---                                                                                              | 1534 | 0  | -         | - |        |
| 114 | Cl_clus100117_Contig1 | ---NA---                                                                                              | 835  | 0  | -         | - |        |
| 115 | Cl_clus100118_Contig1 | sorex araneus protein disulfide isomerase family member 3 transcript variant mrna                     | 1270 | 3  | 4.00E-35  |   | 70.67% |
| 116 | Cl_clus100119_Contig1 | ---NA---                                                                                              | 965  | 0  | -         | - |        |
| 117 | Cl_clus100120_Contig1 | ---NA---                                                                                              | 1610 | 0  | -         | - |        |
| 118 | Cl_clus100121_Contig1 | ---NA---                                                                                              | 1617 | 0  | -         | - |        |
| 119 | Cl_clus100122_Contig1 | biston betularia ribosomal protein l4 partial cds                                                     | 1424 | 20 | 5.90E-135 |   | 69.15% |
| 120 | Cl_clus100123_Contig1 | ---NA---                                                                                              | 1017 | 0  | -         | - |        |
| 121 | Cl_clus100124_Contig1 | ---NA---                                                                                              | 1074 | 0  | -         | - |        |
| 122 | Cl_clus100125_Contig1 | ---NA---                                                                                              | 780  | 0  | -         | - |        |
| 123 | Cl_clus100126_Contig1 | oryza sativa japonica group cdna clone:006-205- full insert sequence                                  | 1498 | 20 | 6.60E-141 |   | 73.00% |
| 124 | Cl_clus100127_Contig1 | ---NA---                                                                                              | 637  | 0  | -         | - |        |
| 125 | Cl_clus100128_Contig1 | ---NA---                                                                                              | 875  | 0  | -         | - |        |
| 126 | Cl_clus100129_Contig1 | aedes aegypti troponin c partial mrna                                                                 | 1230 | 8  | 5.80E-71  |   | 71.63% |
| 127 | Cl_clus100130_Contig1 | ---NA---                                                                                              | 952  | 0  | -         | - |        |
| 128 | Cl_clus100131_Contig1 | ---NA---                                                                                              | 1977 | 0  | -         | - |        |
| 129 | Cl_clus100132_Contig1 | ---NA---                                                                                              | 1667 | 0  | -         | - |        |
| 130 | Cl_clus100133_Contig1 | ---NA---                                                                                              | 1326 | 0  | -         | - |        |
| 131 | Cl_clus100134_Contig1 | ---NA---                                                                                              | 1146 | 0  | -         | - |        |
| 132 | Cl_clus100136_Contig1 | ---NA---                                                                                              | 1645 | 0  | -         | - |        |
| 133 | Cl_clus100135_Contig1 | tetraodon nigroviridis full-length cdna                                                               | 1800 | 20 | 0.00E+00  |   | 80.65% |
| 134 | Cl_clus100137_Contig1 | ---NA---                                                                                              | 1155 | 0  | -         | - |        |
| 135 | Cl_clus100138_Contig1 | ---NA---                                                                                              | 1205 | 0  | -         | - |        |
| 136 | Cl_clus100139_Contig1 | ---NA---                                                                                              | 1745 | 0  | -         | - |        |
| 137 | Cl_clus100140_Contig1 | drosophila mojavensis gi12770 (dmoj\gi12770) mrna                                                     | 461  | 20 | 3.70E-125 |   | 78.95% |
| 138 | Cl_clus100141_Contig1 | chilo suppressalis complete genome                                                                    | 1132 | 20 | 0.00E+00  |   | 75.10% |
| 139 | Cl_clus100142_Contig1 | ---NA---                                                                                              | 1331 | 0  | -         | - |        |
| 140 | Cl_clus100143_Contig1 | trichophyton rubrum cbs 118892 atp-dependent rna helicase eif4a complete cds                          | 1401 | 18 | 0.00E+00  |   | 71.83% |
| 141 | Cl_clus100145_Contig1 | ---NA---                                                                                              | 939  | 0  | -         | - |        |
| 142 | Cl_clus100144_Contig1 | ---NA---                                                                                              | 1708 | 0  | -         | - |        |
| 143 | Cl_clus100146_Contig1 | ---NA---                                                                                              | 1717 | 0  | -         | - |        |
| 144 | Cl_clus100147_Contig1 | ---NA---                                                                                              | 1762 | 0  | -         | - |        |
| 145 | Cl_clus100148_Contig1 | papilio xuthus mrna for beta- complete sequence id: px-0214                                           | 1627 | 20 | 0.00E+00  |   | 81.50% |
| 146 | Cl_clus100149_Contig1 | tentyria rotundata partial mp20 gene for muscular protein specimen voucher bmnh exons 1-2             | 994  | 20 | 4.00E-116 |   | 70.65% |
| 147 | Cl_clus100151_Contig1 | ---NA---                                                                                              | 2347 | 0  | -         | - |        |
| 148 | Cl_clus100150_Contig1 | gallus gallus tripartite motif-containing 3 transcript variant mrna                                   | 1861 | 5  | 1.00E-139 |   | 87.40% |
| 149 | Cl_clus100152_Contig1 | ---NA---                                                                                              | 2749 | 0  | -         | - |        |
| 150 | Cl_clus100153_Contig1 | drosophila melanogaster ferritin 1 heavy chain homologue transcript variant mrna                      | 1122 | 20 | 1.20E-53  |   | 76.70% |
| 151 | Cl_clus100154_Contig1 | ---NA---                                                                                              | 691  | 0  | -         | - |        |
| 152 | Cl_clus100156_Contig1 | ---NA---                                                                                              | 1436 | 0  | -         | - |        |
| 153 | Cl_clus100155_Contig1 | ---NA---                                                                                              | 1493 | 0  | -         | - |        |
| 154 | Cl_clus100157_Contig1 | ---NA---                                                                                              | 1911 | 0  | -         | - |        |
| 155 | Cl_clus100159_Contig1 | ---NA---                                                                                              | 950  | 0  | -         | - |        |
| 156 | Cl_clus100160_Contig1 | ---NA---                                                                                              | 1299 | 0  | -         | - |        |
| 157 | Cl_clus100158_Contig1 | ---NA---                                                                                              | 857  | 0  | -         | - |        |
| 158 | Cl_clus100161_Contig1 | ---NA---                                                                                              | 884  | 0  | -         | - |        |
| 159 | Cl_clus100162_Contig1 | ---NA---                                                                                              | 1359 | 0  | -         | - |        |
| 160 | Cl_clus100163_Contig1 | ---NA---                                                                                              | 872  | 0  | -         | - |        |
| 161 | Cl_clus100164_Contig1 | ---NA---                                                                                              | 3612 | 0  | -         | - |        |
| 162 | Cl_clus100166_Contig1 | ---NA---                                                                                              | 872  | 0  | -         | - |        |
| 163 | Cl_clus100165_Contig1 | ---NA---                                                                                              | 1092 | 0  | -         | - |        |
| 164 | Cl_clus100167_Contig1 | ---NA---                                                                                              | 1052 | 0  | -         | - |        |
| 165 | Cl_clus100168_Contig1 | acyrthosiphon pisum clone: full-insert cdna sequence based on ests (5 - est: 3 -est aci2aaf1yd14bbm1) | 1479 | 14 | 5.30E-142 |   | 70.07% |

|     |                       |                                                                                             |      |    |           |        |  |
|-----|-----------------------|---------------------------------------------------------------------------------------------|------|----|-----------|--------|--|
| 166 | Cl_clus100169_Contig1 | ---NA---                                                                                    | 1228 | 0  | -         | -      |  |
| 167 | Cl_clus100170_Contig1 | ---NA---                                                                                    | 956  | 0  | -         | -      |  |
| 168 | Cl_clus100171_Contig1 | <i>gryllus bimaculatus</i> gbcontig28300                                                    | 1070 | 4  | 1.00E-79  | 78.25% |  |
| 169 | Cl_clus100172_Contig1 | <i>locusta migratoria</i> gapdh complete cds                                                | 1398 | 20 | 0.00E+00  | 75.60% |  |
| 170 | Cl_clus100181_Contig1 | ---NA---                                                                                    | 739  | 0  | -         | -      |  |
| 171 | Cl_clus100185_Contig1 | ---NA---                                                                                    | 1194 | 0  | -         | -      |  |
| 172 | Cl_clus100186_Contig1 | ---NA---                                                                                    | 1884 | 0  | -         | -      |  |
| 173 | Cl_clus100182_Contig1 | ---NA---                                                                                    | 844  | 0  | -         | -      |  |
| 174 | Cl_clus100183_Contig1 | ---NA---                                                                                    | 1258 | 0  | -         | -      |  |
| 175 | Cl_clus100187_Contig2 | ---NA---                                                                                    | 1678 | 0  | -         | -      |  |
| 176 | Cl_clus100189_Contig1 | ---NA---                                                                                    | 925  | 0  | -         | -      |  |
| 177 | Cl_clus100190_Contig1 | <i>cricetulus griseus</i> protein transport protein sec61 subunit alpha isoform 1-like mrna | 1084 | 3  | 5.80E-26  | 83.67% |  |
| 178 | Cl_clus100191_Contig1 | ---NA---                                                                                    | 1412 | 0  | -         | -      |  |
| 179 | Cl_clus100184_Contig1 | <i>gryllus bimaculatus</i> gbcontig29003                                                    | 874  | 1  | 1.30E-45  | 73.00% |  |
| 180 | Cl_clus100192_Contig1 | ---NA---                                                                                    | 714  | 0  | -         | -      |  |
| 181 | Cl_clus100194_Contig1 | ---NA---                                                                                    | 1132 | 0  | -         | -      |  |
| 182 | Cl_clus100195_Contig1 | ---NA---                                                                                    | 1547 | 0  | -         | -      |  |
| 183 | Cl_clus100196_Contig1 | ---NA---                                                                                    | 867  | 0  | -         | -      |  |
| 184 | Cl_clus100197_Contig1 | ---NA---                                                                                    | 1141 | 0  | -         | -      |  |
| 185 | Cl_clus100198_Contig1 | ---NA---                                                                                    | 1187 | 0  | -         | -      |  |
| 186 | Cl_clus100199_Contig1 | ---NA---                                                                                    | 804  | 0  | -         | -      |  |
| 187 | Cl_clus100200_Contig1 | ---NA---                                                                                    | 973  | 0  | -         | -      |  |
| 188 | Cl_clus100201_Contig1 | ---NA---                                                                                    | 1248 | 0  | -         | -      |  |
| 189 | Cl_clus100202_Contig1 | <i>monodelphis domestica</i> glycogen muscle form-like mrna                                 | 1413 | 3  | 0.00E+00  | 71.33% |  |
| 190 | Cl_clus100203_Contig1 | ---NA---                                                                                    | 897  | 0  | -         | -      |  |
| 191 | Cl_clus100204_Contig1 | ---NA---                                                                                    | 1250 | 0  | -         | -      |  |
| 192 | Cl_clus100205_Contig1 | ---NA---                                                                                    | 760  | 0  | -         | -      |  |
| 193 | Cl_clus100206_Contig1 | ---NA---                                                                                    | 1516 | 0  | -         | -      |  |
| 194 | Cl_clus100207_Contig1 | ---NA---                                                                                    | 961  | 0  | -         | -      |  |
| 195 | Cl_clus100209_Contig1 | ---NA---                                                                                    | 997  | 0  | -         | -      |  |
| 196 | Cl_clus100210_Contig1 | ---NA---                                                                                    | 1182 | 0  | -         | -      |  |
| 197 | Cl_clus100211_Contig1 | ---NA---                                                                                    | 788  | 0  | -         | -      |  |
| 198 | Cl_clus100212_Contig1 | <i>gryllus bimaculatus</i> gbcontig06695                                                    | 849  | 1  | 4.80E-13  | 81.00% |  |
| 199 | Cl_clus100213_Contig1 | ---NA---                                                                                    | 839  | 0  | -         | -      |  |
| 200 | Cl_clus100214_Contig1 | ---NA---                                                                                    | 717  | 0  | -         | -      |  |
| 201 | Cl_clus100215_Contig1 | ---NA---                                                                                    | 467  | 0  | -         | -      |  |
| 202 | Cl_clus100216_Contig1 | ---NA---                                                                                    | 679  | 0  | -         | -      |  |
| 203 | Cl_clus100218_Contig1 | ---NA---                                                                                    | 787  | 0  | -         | -      |  |
| 204 | Cl_clus100188_Contig1 | ---NA---                                                                                    | 1289 | 0  | -         | -      |  |
| 205 | Cl_clus100217_Contig1 | ---NA---                                                                                    | 1345 | 0  | -         | -      |  |
| 206 | Cl_clus100193_Contig1 | ---NA---                                                                                    | 760  | 0  | -         | -      |  |
| 207 | Cl_clus100219_Contig1 | <i>sycon ciliatum</i> mrna for 60s ribosomal protein l44 (rpl44 gene)                       | 448  | 2  | 9.10E-38  | 72.00% |  |
| 208 | Cl_clus100220_Contig1 | ---NA---                                                                                    | 513  | 0  | -         | -      |  |
| 209 | Cl_clus100208_Contig1 | ---NA---                                                                                    | 428  | 0  | -         | -      |  |
| 210 | Cl_clus100221_Contig1 | ---NA---                                                                                    | 426  | 0  | -         | -      |  |
| 211 | Cl_clus100222_Contig1 | <i>aedes albopictus</i> clone al_249 translationally controlled tumor protein complete cds  | 830  | 6  | 3.00E-47  | 67.33% |  |
| 212 | Cl_clus100223_Contig1 | ---NA---                                                                                    | 1283 | 0  | -         | -      |  |
| 213 | Cl_clus100224_Contig1 | ---NA---                                                                                    | 1119 | 0  | -         | -      |  |
| 214 | Cl_clus100225_Contig1 | ---NA---                                                                                    | 1601 | 0  | -         | -      |  |
| 215 | Cl_clus100227_Contig1 | ---NA---                                                                                    | 1252 | 0  | -         | -      |  |
| 216 | Cl_clus100228_Contig1 | ---NA---                                                                                    | 1340 | 0  | -         | -      |  |
| 217 | Cl_clus100229_Contig1 | <i>drosophila pseudoobscura</i> pseudoobscura ga25309 (dpse\ga25309) mrna                   | 1438 | 20 | 8.80E-114 | 68.50% |  |
| 218 | Cl_clus100230_Contig1 | <i>leptospira biflexa</i> serovar patoc strain patoc 1 chromosome complete sequence         | 1193 | 7  | 7.70E-177 | 71.57% |  |
| 219 | Cl_clus100231_Contig1 | ---NA---                                                                                    | 1460 | 0  | -         | -      |  |
| 220 | Cl_clus100233_Contig1 | ---NA---                                                                                    | 1067 | 0  | -         | -      |  |
| 221 | Cl_clus100232_Contig1 | ---NA---                                                                                    | 1089 | 0  | -         | -      |  |

|     |                       |                                                                                                                                                                                                  |      |    |           |        |
|-----|-----------------------|--------------------------------------------------------------------------------------------------------------------------------------------------------------------------------------------------|------|----|-----------|--------|
| 222 | Cl_clus100234_Contig1 | single read from an extremity of a full-length cDNA clone made from anopheles gambiae total adult 5-prime end of clone fk0aaa6ag11 of strain 6-9 of anopheles gambiae (african malaria mosquito) | 1568 | 20 | 4.40E-80  | 80.60% |
| 223 | Cl_clus100235_Contig1 | ---NA---                                                                                                                                                                                         | 961  | 0  | -         | -      |
| 224 | Cl_clus100236_Contig1 | ---NA---                                                                                                                                                                                         | 1463 | 0  | -         | -      |
| 225 | Cl_clus100237_Contig1 | ---NA---                                                                                                                                                                                         | 1214 | 0  | -         | -      |
| 226 | Cl_clus100238_Contig1 | papilio polytes mRNA for ribosomal protein complete sequence id: pp-0493                                                                                                                         | 1261 | 20 | 0.00E+00  | 72.65% |
| 227 | Cl_clus100239_Contig1 | dasytus novemcinctus liver transcript variant mRNA                                                                                                                                               | 927  | 7  | 1.20E-103 | 75.71% |
| 228 | Cl_clus100240_Contig1 | ---NA---                                                                                                                                                                                         | 845  | 0  | -         | -      |
| 229 | Cl_clus100241_Contig1 | bombus impatiens protein translation factor sui1 homolog mRNA                                                                                                                                    | 1088 | 20 | 2.60E-106 | 81.45% |
| 230 | Cl_clus100243_Contig1 | mus musculus ribosomal protein pseudogene (rps23-ps) on chromosome 3                                                                                                                             | 559  | 20 | 1.10E-88  | 76.05% |
| 231 | Cl_clus100245_Contig2 | ---NA---                                                                                                                                                                                         | 727  | 0  | -         | -      |
| 232 | Cl_clus100242_Contig1 | drosophila grimshawi gh25015 (dgr\gh25015) mRNA                                                                                                                                                  | 1562 | 2  | 2.30E-39  | 69.00% |
| 233 | Cl_clus100244_Contig1 | ---NA---                                                                                                                                                                                         | 1237 | 0  | -         | -      |
| 234 | Cl_clus100246_Contig1 | ---NA---                                                                                                                                                                                         | 1833 | 0  | -         | -      |
| 235 | Cl_clus100247_Contig1 | ---NA---                                                                                                                                                                                         | 1363 | 0  | -         | -      |
| 236 | Cl_clus100248_Contig1 | ---NA---                                                                                                                                                                                         | 823  | 0  | -         | -      |
| 237 | Cl_clus100249_Contig1 | papilio bianor complete genome                                                                                                                                                                   | 1503 | 20 | 1.70E-167 | 78.70% |
| 238 | Cl_clus100250_Contig1 | nasonia vitripennis muscle m-line assembly protein unc-89-like mRNA                                                                                                                              | 967  | 2  | 1.50E-102 | 71.00% |
| 239 | Cl_clus100252_Contig1 | ---NA---                                                                                                                                                                                         | 1302 | 0  | -         | -      |
| 240 | Cl_clus100251_Contig1 | ---NA---                                                                                                                                                                                         | 1077 | 0  | -         | -      |
| 241 | Cl_clus100253_Contig1 | drosophila melanogaster ribosomal protein s2 transcript variant mRNA                                                                                                                             | 904  | 20 | 0.00E+00  | 78.65% |
| 242 | Cl_clus100254_Contig1 | coptotermes formosanus clone cfsni164 heavy subunit complete cds                                                                                                                                 | 1005 | 2  | 3.60E-47  | 66.00% |
| 243 | Cl_clus100255_Contig1 | ---NA---                                                                                                                                                                                         | 2142 | 0  | -         | -      |
| 244 | Cl_clus100256_Contig1 | ---NA---                                                                                                                                                                                         | 1127 | 0  | -         | -      |
| 245 | Cl_clus100257_Contig1 | diaphorina citri clone whdc1630 atp synthase gamma subunit partial cds                                                                                                                           | 821  | 1  | 5.60E-31  | 77.00% |
| 246 | Cl_clus100258_Contig1 | ---NA---                                                                                                                                                                                         | 645  | 0  | -         | -      |
| 247 | Cl_clus100259_Contig2 | reticulitermes flavipes beta-actin complete cds                                                                                                                                                  | 1576 | 20 | 0.00E+00  | 84.95% |
| 248 | Cl_clus100260_Contig1 | ---NA---                                                                                                                                                                                         | 952  | 0  | -         | -      |
| 249 | Cl_clus100261_Contig1 | drosophila melanogaster myosin heavy chain transcript variant mRNA                                                                                                                               | 1933 | 20 | 0.00E+00  | 85.15% |
| 250 | Cl_clus100262_Contig1 | ---NA---                                                                                                                                                                                         | 1602 | 0  | -         | -      |
| 251 | Cl_clus100263_Contig1 | ---NA---                                                                                                                                                                                         | 898  | 0  | -         | -      |
| 252 | Cl_clus100264_Contig1 | ---NA---                                                                                                                                                                                         | 1326 | 0  | -         | -      |
| 253 | Cl_clus100265_Contig1 | ---NA---                                                                                                                                                                                         | 1066 | 0  | -         | -      |
| 254 | Cl_clus100266_Contig1 | ---NA---                                                                                                                                                                                         | 1179 | 0  | -         | -      |
| 255 | Cl_clus100267_Contig1 | ---NA---                                                                                                                                                                                         | 934  | 0  | -         | -      |
| 256 | Cl_clus100268_Contig1 | ---NA---                                                                                                                                                                                         | 1226 | 0  | -         | -      |
| 257 | Cl_clus100269_Contig1 | ---NA---                                                                                                                                                                                         | 852  | 0  | -         | -      |
| 258 | Cl_clus100270_Contig1 | ---NA---                                                                                                                                                                                         | 919  | 0  | -         | -      |
| 259 | Cl_clus100271_Contig1 | ---NA---                                                                                                                                                                                         | 779  | 0  | -         | -      |
| 260 | Cl_clus100272_Contig1 | ---NA---                                                                                                                                                                                         | 980  | 0  | -         | -      |
| 261 | Cl_clus100273_Contig1 | ---NA---                                                                                                                                                                                         | 1179 | 0  | -         | -      |
| 262 | Cl_clus100274_Contig1 | ---NA---                                                                                                                                                                                         | 625  | 0  | -         | -      |
| 263 | Cl_clus100275_Contig1 | ---NA---                                                                                                                                                                                         | 604  | 0  | -         | -      |
| 264 | Cl_clus100276_Contig1 | ---NA---                                                                                                                                                                                         | 1319 | 0  | -         | -      |
| 265 | Cl_clus100277_Contig1 | ---NA---                                                                                                                                                                                         | 1863 | 0  | -         | -      |
| 266 | Cl_clus100278_Contig1 | ---NA---                                                                                                                                                                                         | 1159 | 0  | -         | -      |
| 267 | Cl_clus100279_Contig1 | maconellicoccus hirsutus clone whmh2520 ribosomal protein l13 complete cds                                                                                                                       | 723  | 2  | 4.30E-57  | 68.50% |
| 268 | Cl_clus100280_Contig1 | cicer arietinum t-complex protein 1 subunit epsilon-like mRNA                                                                                                                                    | 1015 | 1  | 6.20E-57  | 68.00% |
| 269 | Cl_clus100281_Contig1 | ---NA---                                                                                                                                                                                         | 849  | 0  | -         | -      |
| 270 | Cl_clus100283_Contig1 | anopheles gambiae pest agap002154-pb partial cds                                                                                                                                                 | 1237 | 2  | 1.40E-72  | 69.00% |
| 271 | Cl_clus100284_Contig1 | ---NA---                                                                                                                                                                                         | 1267 | 0  | -         | -      |
| 272 | Cl_clus100285_Contig1 | ---NA---                                                                                                                                                                                         | 978  | 0  | -         | -      |
| 273 | Cl_clus100286_Contig1 | drosophila sechellia gm26300 (dsec\gm26300) mRNA                                                                                                                                                 | 1272 | 3  | 4.00E-35  | 80.33% |
| 274 | Cl_clus100287_Contig1 | ---NA---                                                                                                                                                                                         | 406  | 0  | -         | -      |
| 275 | Cl_clus100282_Contig1 | ---NA---                                                                                                                                                                                         | 1091 | 0  | -         | -      |

|     |                       |                                                                                                |      |    |           |        |  |
|-----|-----------------------|------------------------------------------------------------------------------------------------|------|----|-----------|--------|--|
| 276 | Cl_clus100288_Contig1 | ---NA---                                                                                       | 1075 | 0  | -         | -      |  |
| 277 | Cl_clus100289_Contig1 | ---NA---                                                                                       | 835  | 0  | -         | -      |  |
| 278 | Cl_clus100290_Contig1 | ---NA---                                                                                       | 595  | 0  | -         | -      |  |
| 279 | Cl_clus100291_Contig1 | ---NA---                                                                                       | 572  | 0  | -         | -      |  |
| 280 | Cl_clus100292_Contig1 | ematurga atomaria voucher ns43 ribosomal protein s5 partial cds                                | 768  | 20 | 1.60E-151 | 78.75% |  |
| 281 | Cl_clus100293_Contig1 | ---NA---                                                                                       | 887  | 0  | -         | -      |  |
| 282 | Cl_clus100294_Contig1 | ---NA---                                                                                       | 836  | 0  | -         | -      |  |
| 283 | Cl_clus100295_Contig1 | ---NA---                                                                                       | 489  | 0  | -         | -      |  |
| 284 | Cl_clus100296_Contig1 | tetraodon nigroviridis full-length cdna                                                        | 588  | 20 | 1.50E-93  | 74.05% |  |
| 285 | Cl_clus100300_Contig1 | nasonia vitripennis peptidyl-prolyl cis-trans isomerase- transcript variant 2 mrna             | 1143 | 20 | 2.40E-94  | 74.20% |  |
| 286 | Cl_clus100301_Contig1 | ---NA---                                                                                       | 1048 | 0  | -         | -      |  |
| 287 | Cl_clus100302_Contig1 | callorhinchus milii clone ribosomal protein l10 complete cds                                   | 739  | 20 | 2.30E-168 | 76.05% |  |
| 288 | Cl_clus100303_Contig1 | ---NA---                                                                                       | 543  | 0  | -         | -      |  |
| 289 | Cl_clus100304_Contig1 | ---NA---                                                                                       | 333  | 0  | -         | -      |  |
| 290 | Cl_clus100305_Contig1 | ---NA---                                                                                       | 412  | 0  | -         | -      |  |
| 291 | Cl_clus100306_Contig1 | ---NA---                                                                                       | 699  | 0  | -         | -      |  |
| 292 | Cl_clus100307_Contig1 | ---NA---                                                                                       | 1025 | 0  | -         | -      |  |
| 293 | Cl_clus100308_Contig1 | ---NA---                                                                                       | 1049 | 0  | -         | -      |  |
| 294 | Cl_clus100309_Contig1 | placozoa h4 eukaryotic translation initiation factor 5a complete cds                           | 991  | 2  | 7.30E-56  | 81.50% |  |
| 295 | Cl_clus100310_Contig1 | ---NA---                                                                                       | 881  | 0  | -         | -      |  |
| 296 | Cl_clus100311_Contig1 | ---NA---                                                                                       | 1313 | 0  | -         | -      |  |
| 297 | Cl_clus100312_Contig1 | ---NA---                                                                                       | 905  | 0  | -         | -      |  |
| 298 | Cl_clus100313_Contig1 | ---NA---                                                                                       | 690  | 0  | -         | -      |  |
| 299 | Cl_clus100314_Contig1 | ---NA---                                                                                       | 1522 | 0  | -         | -      |  |
| 300 | Cl_clus100315_Contig1 | drosophila melanogaster ryanodine receptor 44f (rya-r44f) transcript variant mrna              | 925  | 20 | 4.60E-134 | 73.45% |  |
| 301 | Cl_clus100316_Contig1 | ---NA---                                                                                       | 709  | 0  | -         | -      |  |
| 302 | Cl_clus100317_Contig1 | ---NA---                                                                                       | 894  | 0  | -         | -      |  |
| 303 | Cl_clus100318_Contig1 | ---NA---                                                                                       | 685  | 0  | -         | -      |  |
| 304 | Cl_clus100319_Contig1 | ---NA---                                                                                       | 1032 | 0  | -         | -      |  |
| 305 | Cl_clus100321_Contig1 | ---NA---                                                                                       | 1171 | 0  | -         | -      |  |
| 306 | Cl_clus100320_Contig1 | ---NA---                                                                                       | 845  | 0  | -         | -      |  |
| 307 | Cl_clus100322_Contig1 | sorex araneus nucleosome assembly protein 1-like 4 mrna                                        | 892  | 2  | 3.20E-28  | 72.00% |  |
| 308 | Cl_clus100323_Contig1 | ---NA---                                                                                       | 588  | 0  | -         | -      |  |
| 309 | Cl_clus100324_Contig1 | ---NA---                                                                                       | 1528 | 0  | -         | -      |  |
| 310 | Cl_clus100325_Contig1 | ---NA---                                                                                       | 556  | 0  | -         | -      |  |
| 311 | Cl_clus100326_Contig1 | ---NA---                                                                                       | 994  | 0  | -         | -      |  |
| 312 | Cl_clus100327_Contig1 | ---NA---                                                                                       | 955  | 0  | -         | -      |  |
| 313 | Cl_clus100328_Contig1 | clitarchus hookeri voucher nzac03005012 cytochrome oxidase subunit i partial cds mitochondrial | 982  | 20 | 0.00E+00  | 96.50% |  |
| 314 | Cl_clus100329_Contig1 | ---NA---                                                                                       | 496  | 0  | -         | -      |  |
| 315 | Cl_clus100330_Contig1 | ---NA---                                                                                       | 448  | 0  | -         | -      |  |
| 316 | Cl_clus100331_Contig1 | ---NA---                                                                                       | 645  | 0  | -         | -      |  |
| 317 | Cl_clus100332_Contig1 | ---NA---                                                                                       | 1164 | 0  | -         | -      |  |
| 318 | Cl_clus100333_Contig1 | ---NA---                                                                                       | 577  | 0  | -         | -      |  |
| 319 | Cl_clus100334_Contig1 | drosophila melanogaster eukaryotic initiation factor 1a (eif-1a) transcript variant mrna       | 1033 | 20 | 2.80E-99  | 77.00% |  |
| 320 | Cl_clus100335_Contig1 | ---NA---                                                                                       | 955  | 0  | -         | -      |  |
| 321 | Cl_clus100336_Contig1 | ---NA---                                                                                       | 1225 | 0  | -         | -      |  |
| 322 | Cl_clus100337_Contig1 | ---NA---                                                                                       | 1266 | 0  | -         | -      |  |
| 323 | Cl_clus100338_Contig1 | chrysomela tremulae ribosomal protein s7 complete cds                                          | 663  | 1  | 4.50E-107 | 77.00% |  |
| 324 | Cl_clus100339_Contig1 | papilio xuthus mrna for ribosomal protein complete sequence id: px-0053                        | 919  | 3  | 1.60E-171 | 74.33% |  |
| 325 | Cl_clus100340_Contig1 | ---NA---                                                                                       | 1063 | 0  | -         | -      |  |
| 326 | Cl_clus100341_Contig1 | ---NA---                                                                                       | 1493 | 0  | -         | -      |  |
| 327 | Cl_clus100342_Contig1 | ---NA---                                                                                       | 1478 | 0  | -         | -      |  |
| 328 | Cl_clus100343_Contig1 | bacillus atticus partial genome                                                                | 752  | 20 | 5.50E-37  | 87.85% |  |
| 329 | Cl_clus100344_Contig1 | gryllus bimaculatus gbcontig00020                                                              | 1128 | 20 | 0.00E+00  | 76.40% |  |
| 330 | Cl_clus100345_Contig1 | ---NA---                                                                                       | 656  | 0  | -         | -      |  |

|     |                       |                                                                                                                                           |      |    |          |   |        |
|-----|-----------------------|-------------------------------------------------------------------------------------------------------------------------------------------|------|----|----------|---|--------|
| 331 | Cl_clus100346_Contig1 | ---NA---                                                                                                                                  | 1137 | 0  | -        | - |        |
| 332 | Cl_clus100347_Contig1 | ---NA---                                                                                                                                  | 625  | 0  | -        | - |        |
| 333 | Cl_clus100349_Contig1 | ---NA---                                                                                                                                  | 1333 | 0  | -        | - |        |
| 334 | Cl_clus100350_Contig1 | ---NA---                                                                                                                                  | 1123 | 0  | -        | - |        |
| 335 | Cl_clus100351_Contig1 | ---NA---                                                                                                                                  | 1299 | 0  | -        | - |        |
| 336 | Cl_clus100348_Contig1 | ---NA---                                                                                                                                  | 1218 | 0  | -        | - |        |
| 337 | Cl_clus100352_Contig1 | aspergillus oryzae rib40 polyadenylate-binding cytoplasmic and mrna                                                                       | 1473 | 12 | 0.00E+00 |   | 72.83% |
| 338 | Cl_clus100354_Contig1 | ---NA---                                                                                                                                  | 1090 | 0  | -        | - |        |
| 339 | Cl_clus100353_Contig1 | gryllus bimaculatus gbcontig31212                                                                                                         | 661  | 1  | 1.20E-44 |   | 74.00% |
| 340 | Cl_clus100355_Contig1 | ---NA---                                                                                                                                  | 1924 | 0  | -        | - |        |
| 341 | Cl_clus100356_Contig1 | ---NA---                                                                                                                                  | 684  | 0  | -        | - |        |
| 342 | Cl_clus100357_Contig1 | ---NA---                                                                                                                                  | 1652 | 0  | -        | - |        |
| 343 | Cl_clus100358_Contig1 | tribolium castaneum troponin c mrna                                                                                                       | 711  | 4  | 1.00E-77 |   | 77.75% |
| 344 | Cl_clus100359_Contig1 | aedes aegypti atpase subunit partial mrna                                                                                                 | 614  | 20 | 9.80E-52 |   | 86.25% |
| 345 | Cl_clus100360_Contig1 | ---NA---                                                                                                                                  | 453  | 0  | -        | - |        |
| 346 | Cl_clus100361_Contig1 | ---NA---                                                                                                                                  | 984  | 0  | -        | - |        |
| 347 | Cl_clus100362_Contig2 | gryllus bimaculatus gbcontig29225                                                                                                         | 1215 | 1  | 5.00E-21 |   | 65.00% |
| 348 | Cl_clus100363_Contig1 | drosophila willistoni gk13316 (dwil\gk13316) mrna                                                                                         | 1713 | 1  | 1.60E-35 |   | 76.00% |
| 349 | Cl_clus100364_Contig1 | ---NA---                                                                                                                                  | 1238 | 0  | -        | - |        |
| 350 | Cl_clus100365_Contig1 | ---NA---                                                                                                                                  | 2140 | 0  | -        | - |        |
| 351 | Cl_clus100366_Contig1 | ---NA---                                                                                                                                  | 1607 | 0  | -        | - |        |
| 352 | Cl_clus100367_Contig1 | ---NA---                                                                                                                                  | 1414 | 0  | -        | - |        |
| 353 | Cl_clus100368_Contig1 | ---NA---                                                                                                                                  | 481  | 0  | -        | - |        |
| 354 | Cl_clus100369_Contig1 | ---NA---                                                                                                                                  | 1371 | 0  | -        | - |        |
| 355 | Cl_clus100370_Contig1 | ---NA---                                                                                                                                  | 700  | 0  | -        | - |        |
| 356 | Cl_clus100371_Contig1 | ---NA---                                                                                                                                  | 818  | 0  | -        | - |        |
| 357 | Cl_clus100372_Contig1 | ---NA---                                                                                                                                  | 756  | 0  | -        | - |        |
| 358 | Cl_clus100373_Contig1 | ---NA---                                                                                                                                  | 702  | 0  | -        | - |        |
| 359 | Cl_clus100374_Contig1 | ---NA---                                                                                                                                  | 843  | 0  | -        | - |        |
| 360 | Cl_clus100375_Contig1 | ---NA---                                                                                                                                  | 1215 | 0  | -        | - |        |
|     |                       |                                                                                                                                           |      |    |          |   |        |
| 361 | Cl_clus100376_Contig1 | ---NA---                                                                                                                                  | 959  | 0  | -        | - |        |
| 362 | Cl_clus100377_Contig1 | ---NA---                                                                                                                                  | 977  | 0  | -        | - |        |
| 363 | Cl_clus100379_Contig1 | ---NA---                                                                                                                                  | 803  | 0  | -        | - |        |
| 364 | Cl_clus100378_Contig1 | ---NA---                                                                                                                                  | 732  | 0  | -        | - |        |
| 365 | Cl_clus100380_Contig1 | ---NA---                                                                                                                                  | 1322 | 0  | -        | - |        |
| 366 | Cl_clus100382_Contig1 | ---NA---                                                                                                                                  | 618  | 0  | -        | - |        |
| 367 | Cl_clus100383_Contig1 | ---NA---                                                                                                                                  | 698  | 0  | -        | - |        |
| 368 | Cl_clus100384_Contig1 | ---NA---                                                                                                                                  | 796  | 0  | -        | - |        |
| 369 | Cl_clus100385_Contig1 | ---NA---                                                                                                                                  | 453  | 0  | -        | - |        |
| 370 | Cl_clus100386_Contig1 | ---NA---                                                                                                                                  | 1126 | 0  | -        | - |        |
| 371 | Cl_clus100387_Contig1 | ---NA---                                                                                                                                  | 766  | 0  | -        | - |        |
| 372 | Cl_clus100388_Contig1 | ---NA---                                                                                                                                  | 639  | 0  | -        | - |        |
| 373 | Cl_clus100389_Contig1 | ---NA---                                                                                                                                  | 858  | 0  | -        | - |        |
| 374 | Cl_clus100390_Contig1 | ---NA---                                                                                                                                  | 834  | 0  | -        | - |        |
| 375 | Cl_clus100391_Contig1 | ---NA---                                                                                                                                  | 645  | 0  | -        | - |        |
| 376 | Cl_clus100392_Contig1 | ---NA---                                                                                                                                  | 824  | 0  | -        | - |        |
| 377 | Cl_clus100393_Contig1 | ---NA---                                                                                                                                  | 404  | 0  | -        | - |        |
| 378 | Cl_clus100394_Contig1 | ---NA---                                                                                                                                  | 838  | 0  | -        | - |        |
| 379 | Cl_clus100395_Contig1 | ---NA---                                                                                                                                  | 928  | 0  | -        | - |        |
| 380 | Cl_clus100396_Contig1 | ---NA---                                                                                                                                  | 1001 | 0  | -        | - |        |
| 381 | Cl_clus100397_Contig1 | ---NA---                                                                                                                                  | 478  | 0  | -        | - |        |
| 382 | Cl_clus100398_Contig1 | ---NA---                                                                                                                                  | 752  | 0  | -        | - |        |
| 383 | Cl_clus100399_Contig1 | ---NA---                                                                                                                                  | 775  | 0  | -        | - |        |
| 384 | Cl_clus100401_Contig1 | ---NA---                                                                                                                                  | 1000 | 0  | -        | - |        |
| 385 | Cl_clus100402_Contig1 | tribolium castaneum s-adenosylmethionine transcript variant 1 mrna<br>single read from an extremity of a full-length cdna clone made from | 397  | 1  | 9.70E-18 |   | 95.00% |
| 386 | Cl_clus100403_Contig1 | anopheles gambiae total adult 3-prime end of clone fk0aaa29ca04 of<br>strain 6-9 of anopheles gambiae (african malaria mosquito)          | 425  | 1  | 3.40E-30 |   | 79.00% |
| 387 | Cl_clus100404_Contig1 | ---NA---                                                                                                                                  | 798  | 0  | -        | - |        |
| 388 | Cl_clus100405_Contig1 | drosophila melanogaster cg2010 transcript variant mrna                                                                                    | 1065 | 18 | 0.00E+00 |   | 76.83% |

|     |                       |                                                                                                                              |      |    |           |   |        |
|-----|-----------------------|------------------------------------------------------------------------------------------------------------------------------|------|----|-----------|---|--------|
| 389 | Cl_clus100406_Contig1 | ---NA---                                                                                                                     | 647  | 0  | -         | - |        |
| 390 | Cl_clus100407_Contig1 | ---NA---                                                                                                                     | 569  | 0  | -         | - |        |
| 391 | Cl_clus100408_Contig1 | plutella xylostella 40 protein complete cds                                                                                  | 657  | 20 | 1.90E-67  |   | 81.05% |
| 392 | Cl_clus100409_Contig1 | ---NA---                                                                                                                     | 528  | 0  | -         | - |        |
| 393 | Cl_clus100410_Contig1 | ---NA---                                                                                                                     | 523  | 0  | -         | - |        |
| 394 | Cl_clus100411_Contig1 | ---NA---                                                                                                                     | 484  | 0  | -         | - |        |
| 395 | Cl_clus100412_Contig1 | anolis carolinensis atp synthase subunit mitochondrial-like mrna                                                             | 552  | 1  | 1.30E-11  |   | 75.00% |
| 396 | Cl_clus100414_Contig1 | chrysomela tremulae ribosomal protein l7 complete cds                                                                        | 840  | 2  | 3.90E-109 |   | 73.00% |
| 397 | Cl_clus100415_Contig1 | ---NA---                                                                                                                     | 428  | 0  | -         | - |        |
| 398 | Cl_clus100416_Contig1 | ---NA---                                                                                                                     | 2119 | 0  | -         | - |        |
| 399 | Cl_clus100417_Contig1 | ---NA---                                                                                                                     | 2229 | 0  | -         | - |        |
| 400 | Cl_clus100418_Contig1 | ---NA---                                                                                                                     | 1149 | 0  | -         | - |        |
| 401 | Cl_clus100419_Contig1 | cardisoma armatum mrna for mitochondrial manganese superoxide dismutase (m gene)                                             | 855  | 11 | 1.30E-83  |   | 70.09% |
| 402 | Cl_clus100420_Contig3 | ---NA---                                                                                                                     | 520  | 0  | -         | - |        |
| 403 | Cl_clus100421_Contig1 | ---NA---                                                                                                                     | 731  | 0  | -         | - |        |
| 404 | Cl_clus100423_Contig1 | ---NA---                                                                                                                     | 657  | 0  | -         | - |        |
| 405 | Cl_clus100422_Contig1 | ---NA---                                                                                                                     | 1014 | 0  | -         | - |        |
| 406 | Cl_clus100424_Contig1 | ---NA---                                                                                                                     | 882  | 0  | -         | - |        |
| 407 | Cl_clus100425_Contig1 | ---NA---                                                                                                                     | 965  | 0  | -         | - |        |
| 408 | Cl_clus100426_Contig1 | ---NA---                                                                                                                     | 924  | 0  | -         | - |        |
| 409 | Cl_clus100427_Contig1 | ---NA---                                                                                                                     | 1093 | 0  | -         | - |        |
| 410 | Cl_clus100428_Contig1 | ---NA---                                                                                                                     | 796  | 0  | -         | - |        |
| 411 | Cl_clus100429_Contig1 | pan troglodytes mrna for glucose-6-phosphate complete clone: -5-5_c06                                                        | 802  | 20 | 1.40E-95  |   | 69.70% |
| 412 | Cl_clus100430_Contig1 | ---NA---                                                                                                                     | 889  | 0  | -         | - |        |
| 413 | Cl_clus100431_Contig1 | ---NA---                                                                                                                     | 779  | 0  | -         | - |        |
| 414 | Cl_clus100432_Contig1 | ---NA---                                                                                                                     | 860  | 0  | -         | - |        |
| 415 | Cl_clus100433_Contig1 | ---NA---                                                                                                                     | 900  | 0  | -         | - |        |
| 416 | Cl_clus100434_Contig1 | ---NA---                                                                                                                     | 808  | 0  | -         | - |        |
| 417 | Cl_clus100435_Contig1 | ---NA---                                                                                                                     | 583  | 0  | -         | - |        |
| 418 | Cl_clus100436_Contig1 | ---NA---                                                                                                                     | 656  | 0  | -         | - |        |
| 419 | Cl_clus100437_Contig1 | ---NA---                                                                                                                     | 477  | 0  | -         | - |        |
| 420 | Cl_clus100439_Contig1 | taeniopygia guttata nadh dehydrogenase flavoprotein 51kda mrna                                                               | 1259 | 5  | 4.20E-155 |   | 70.40% |
| 421 | Cl_clus100440_Contig1 | neurospora crassa or74a peptidyl-prolyl cis-trans isomerase b precursor partial mrna                                         | 1307 | 14 | 6.10E-71  |   | 70.86% |
| 422 | Cl_clus100442_Contig1 | ---NA---                                                                                                                     | 978  | 0  | -         | - |        |
| 423 | Cl_clus100443_Contig1 | mus musculus cri-1722 l5178y-r riken full-length enriched clone:i730086p06 product:chaperonin subunit 5 full insert sequence | 1004 | 20 | 1.10E-110 |   | 71.55% |
| 424 | Cl_clus100444_Contig1 | ---NA---                                                                                                                     | 328  | 0  | -         | - |        |
| 425 | Cl_clus100446_Contig1 | ---NA---                                                                                                                     | 442  | 0  | -         | - |        |
| 426 | Cl_clus100447_Contig1 | ---NA---                                                                                                                     | 550  | 0  | -         | - |        |
| 427 | Cl_clus100438_Contig1 | ---NA---                                                                                                                     | 449  | 0  | -         | - |        |
| 428 | Cl_clus100448_Contig1 | mustela putorius furo nucleoside diphosphate kinase chloroplastic-like transcript variant mrna                               | 745  | 8  | 1.90E-55  |   | 72.38% |
| 429 | Cl_clus100449_Contig1 | nasonia vitripennis muscle m-line assembly protein unc-89-like mrna                                                          | 1007 | 4  | 0.00E+00  |   | 73.50% |
| 430 | Cl_clus100451_Contig1 | ---NA---                                                                                                                     | 749  | 0  | -         | - |        |
| 431 | Cl_clus100452_Contig1 | ---NA---                                                                                                                     | 938  | 0  | -         | - |        |
| 432 | Cl_clus100453_Contig1 | ---NA---                                                                                                                     | 970  | 0  | -         | - |        |
| 433 | Cl_clus100454_Contig1 | ---NA---                                                                                                                     | 985  | 0  | -         | - |        |
| 434 | Cl_clus100441_Contig1 | ---NA---                                                                                                                     | 311  | 0  | -         | - |        |
| 435 | Cl_clus100456_Contig1 | ---NA---                                                                                                                     | 1490 | 0  | -         | - |        |
| 436 | Cl_clus100457_Contig1 | ---NA---                                                                                                                     | 953  | 0  | -         | - |        |
| 437 | Cl_clus100458_Contig1 | phebotomus papatasi 40s ribosomal protein s8-like protein complete cds                                                       | 366  | 1  | 7.80E-63  |   | 75.00% |
| 438 | Cl_clus100459_Contig1 | ---NA---                                                                                                                     | 661  | 0  | -         | - |        |
| 439 | Cl_clus100461_Contig1 | ---NA---                                                                                                                     | 466  | 0  | -         | - |        |
| 440 | Cl_clus100462_Contig1 | ---NA---                                                                                                                     | 1629 | 0  | -         | - |        |
| 441 | Cl_clus100463_Contig1 | ---NA---                                                                                                                     | 396  | 0  | -         | - |        |
| 442 | Cl_clus100464_Contig1 | ---NA---                                                                                                                     | 764  | 0  | -         | - |        |



|     |                       |                                                                                        |      |    |           |        |
|-----|-----------------------|----------------------------------------------------------------------------------------|------|----|-----------|--------|
| 443 | Cl_clus100465_Contig1 | drosophila melanogaster paxillin transcript variant mrna                               | 821  | 20 | 5.20E-177 | 81.20% |
| 444 | Cl_clus100466_Contig1 | ---NA---                                                                               | 671  | 0  | -         | -      |
| 445 | Cl_clus100467_Contig1 | ---NA---                                                                               | 597  | 0  | -         | -      |
| 446 | Cl_clus100468_Contig1 | dna for 18s ribosomal rna                                                              | 859  | 20 | 0.00E+00  | 96.10% |
| 447 | Cl_clus100469_Contig1 | boechera divaricarpa isolate slw-d-d09 mrna sequence                                   | 618  | 20 | 3.00E-172 | 79.85% |
| 448 | Cl_clus100470_Contig1 | ---NA---                                                                               | 674  | 0  | -         | -      |
| 449 | Cl_clus100471_Contig1 | ---NA---                                                                               | 814  | 0  | -         | -      |
| 450 | Cl_clus100472_Contig1 | ---NA---                                                                               | 900  | 0  | -         | -      |
| 451 | Cl_clus100473_Contig1 | ---NA---                                                                               | 1205 | 0  | -         | -      |
| 452 | Cl_clus100474_Contig1 | ---NA---                                                                               | 814  | 0  | -         | -      |
| 453 | Cl_clus100475_Contig1 | ---NA---                                                                               | 612  | 0  | -         | -      |
| 454 | Cl_clus100476_Contig1 | sipylloidea sipylus mitochondrial partial genome                                       | 1213 | 20 | 0.00E+00  | 81.05% |
| 455 | Cl_clus100477_Contig1 | ---NA---                                                                               | 533  | 0  | -         | -      |
| 456 | Cl_clus100478_Contig1 | ---NA---                                                                               | 1665 | 0  | -         | -      |
| 457 | Cl_clus100479_Contig1 | ---NA---                                                                               | 1103 | 0  | -         | -      |
| 458 | Cl_clus100445_Contig1 | ---NA---                                                                               | 818  | 0  | -         | -      |
| 459 | Cl_clus100460_Contig1 | ---NA---                                                                               | 371  | 0  | -         | -      |
| 460 | Cl_clus100450_Contig1 | ---NA---                                                                               | 510  | 0  | -         | -      |
| 461 | Cl_clus100455_Contig1 | nasonia vitripennis ribosomal protein l39 mrna                                         | 268  | 1  | 3.90E-33  | 81.00% |
| 462 | Cl_clus100480_Contig1 | ---NA---                                                                               | 957  | 0  | -         | -      |
| 463 | Cl_clus100481_Contig1 | ---NA---                                                                               | 619  | 0  | -         | -      |
| 464 | Cl_clus100482_Contig1 | cucumis sativus 60s ribosomal protein l23a-like mrna                                   | 809  | 6  | 5.60E-50  | 76.50% |
| 465 | Cl_clus100483_Contig1 | ---NA---                                                                               | 656  | 0  | -         | -      |
| 466 | Cl_clus100484_Contig1 | ---NA---                                                                               | 807  | 0  | -         | -      |
| 467 | Cl_clus100485_Contig1 | ---NA---                                                                               | 460  | 0  | -         | -      |
| 468 | Cl_clus100486_Contig1 | ---NA---                                                                               | 843  | 0  | -         | -      |
| 469 | Cl_clus100487_Contig1 | gryllus bimaculatus gbcontig31584                                                      | 887  | 1  | 4.70E-102 | 78.00% |
| 470 | Cl_clus100488_Contig1 | ---NA---                                                                               | 928  | 0  | -         | -      |
| 471 | Cl_clus100489_Contig1 | ---NA---                                                                               | 1116 | 0  | -         | -      |
| 472 | Cl_clus100490_Contig1 | anolis carolinensis protein phosphatase regulatory subunit 12a mrna                    | 708  | 1  | 1.40E-12  | 77.00% |
| 473 | Cl_clus100491_Contig1 | ---NA---                                                                               | 366  | 0  | -         | -      |
| 474 | Cl_clus100493_Contig2 | ---NA---                                                                               | 458  | 0  | -         | -      |
| 475 | Cl_clus100494_Contig1 | ---NA---                                                                               | 951  | 0  | -         | -      |
| 476 | Cl_clus100495_Contig1 | drosophila melanogaster tropomyosin 2 transcript variant mrna                          | 772  | 20 | 0.00E+00  | 79.10% |
| 477 | Cl_clus100492_Contig1 | ---NA---                                                                               | 709  | 0  | -         | -      |
| 478 | Cl_clus100496_Contig1 | ---NA---                                                                               | 1079 | 0  | -         | -      |
| 479 | Cl_clus100497_Contig1 | gryllus bimaculatus gbcontig19906                                                      | 1324 | 1  | 4.20E-168 | 80.00% |
| 480 | Cl_clus100498_Contig1 | drosophila melanogaster myosin heavy chain transcript variant mrna                     | 1139 | 20 | 0.00E+00  | 79.65% |
| 481 | Cl_clus100499_Contig1 | ---NA---                                                                               | 909  | 0  | -         | -      |
| 482 | Cl_clus100500_Contig1 | strongylocentrotus purpuratus 5-amp-activated protein kinase subunit gamma-2-like mrna | 339  | 1  | 2.20E-12  | 68.00% |
| 483 | Cl_clus100501_Contig1 | ---NA---                                                                               | 595  | 0  | -         | -      |
| 484 | Cl_clus100502_Contig1 | ---NA---                                                                               | 1682 | 0  | -         | -      |
| 485 | Cl_clus100503_Contig1 | ---NA---                                                                               | 486  | 0  | -         | -      |
| 486 | Cl_clus100504_Contig1 | ---NA---                                                                               | 667  | 0  | -         | -      |
| 487 | Cl_clus100505_Contig1 | ---NA---                                                                               | 591  | 0  | -         | -      |
| 488 | Cl_clus100507_Contig1 | ---NA---                                                                               | 371  | 0  | -         | -      |
| 489 | Cl_clus100508_Contig1 | ---NA---                                                                               | 774  | 0  | -         | -      |
| 490 | Cl_clus100509_Contig1 | ---NA---                                                                               | 575  | 0  | -         | -      |
| 491 | Cl_clus100510_Contig1 | ---NA---                                                                               | 614  | 0  | -         | -      |
| 492 | Cl_clus100512_Contig1 | ---NA---                                                                               | 735  | 0  | -         | -      |
| 493 | Cl_clus100513_Contig1 | ---NA---                                                                               | 695  | 0  | -         | -      |
| 494 | Cl_clus100515_Contig1 | ---NA---                                                                               | 893  | 0  | -         | -      |
| 495 | Cl_clus100516_Contig1 | ---NA---                                                                               | 603  | 0  | -         | -      |
| 496 | Cl_clus100511_Contig1 | ---NA---                                                                               | 267  | 0  | -         | -      |
| 497 | Cl_clus100514_Contig1 | ---NA---                                                                               | 480  | 0  | -         | -      |
| 498 | Cl_clus100517_Contig1 | ---NA---                                                                               | 293  | 0  | -         | -      |
| 499 | Cl_clus100519_Contig1 | ---NA---                                                                               | 1042 | 0  | -         | -      |
| 500 | Cl_clus100520_Contig1 | ---NA---                                                                               | 391  | 0  | -         | -      |
| 501 | Cl_clus100506_Contig1 | ---NA---                                                                               | 752  | 0  | -         | -      |

|     |                       |                                                                                                                 |      |    |           |   |        |
|-----|-----------------------|-----------------------------------------------------------------------------------------------------------------|------|----|-----------|---|--------|
| 502 | Cl_clus100521_Contig1 | ---NA---                                                                                                        | 490  | 0  | -         | - |        |
| 503 | Cl_clus100518_Contig1 | ---NA---                                                                                                        | 975  | 0  | -         | - |        |
| 504 | Cl_clus100522_Contig1 | ---NA---                                                                                                        | 667  | 0  | -         | - |        |
| 505 | Cl_clus100524_Contig1 | ---NA---                                                                                                        | 516  | 0  | -         | - |        |
| 506 | Cl_clus100525_Contig1 | ---NA---                                                                                                        | 535  | 0  | -         | - |        |
| 507 | Cl_clus100526_Contig1 | ---NA---                                                                                                        | 643  | 0  | -         | - |        |
| 508 | Cl_clus100527_Contig1 | ---NA---                                                                                                        | 722  | 0  | -         | - |        |
| 509 | Cl_clus100528_Contig1 | ---NA---                                                                                                        | 385  | 0  | -         | - |        |
| 510 | Cl_clus100529_Contig1 | ---NA---                                                                                                        | 863  | 0  | -         | - |        |
| 511 | Cl_clus100530_Contig1 | ---NA---                                                                                                        | 526  | 0  | -         | - |        |
| 512 | Cl_clus100531_Contig1 | ---NA---                                                                                                        | 664  | 0  | -         | - |        |
| 513 | Cl_clus100532_Contig1 | ---NA---                                                                                                        | 669  | 0  | -         | - |        |
| 514 | Cl_clus100523_Contig1 | ---NA---                                                                                                        | 793  | 0  | -         | - |        |
| 515 | Cl_clus100534_Contig1 | ---NA---                                                                                                        | 381  | 0  | -         | - |        |
| 516 | Cl_clus100535_Contig1 | ---NA---                                                                                                        | 914  | 0  | -         | - |        |
| 517 | Cl_clus100536_Contig1 | ---NA---                                                                                                        | 520  | 0  | -         | - |        |
| 518 | Cl_clus100537_Contig1 | dermacentor variabilis isolate 40 ribosomal protein l12 complete cds                                            | 288  | 1  | 3.80E-21  |   | 69.00% |
| 519 | Cl_clus100538_Contig1 | ---NA---                                                                                                        | 385  | 0  | -         | - |        |
| 520 | Cl_clus100539_Contig1 | ---NA---                                                                                                        | 377  | 0  | -         | - |        |
| 521 | Cl_clus100533_Contig1 | bos taurus eukaryotic translation elongation factor 1 delta transcript variant 1 complete alternatively spliced | 777  | 5  | 9.00E-41  |   | 70.00% |
| 522 | Cl_clus100540_Contig1 | ---NA---                                                                                                        | 823  | 0  | -         | - |        |
| 523 | Cl_clus100541_Contig1 | ---NA---                                                                                                        | 313  | 0  | -         | - |        |
| 524 | Cl_clus100542_Contig1 | ---NA---                                                                                                        | 479  | 0  | -         | - |        |
| 525 | Cl_clus100543_Contig1 | ---NA---                                                                                                        | 584  | 0  | -         | - |        |
| 526 | Cl_clus100544_Contig1 | ---NA---                                                                                                        | 384  | 0  | -         | - |        |
| 527 | Cl_clus100547_Contig1 | ---NA---                                                                                                        | 709  | 0  | -         | - |        |
| 528 | Cl_clus100545_Contig1 | ovis aries 40s ribosomal protein s15a-like mrna                                                                 | 488  | 20 | 3.20E-88  |   | 76.70% |
| 529 | Cl_clus100549_Contig1 | ---NA---                                                                                                        | 404  | 0  | -         | - |        |
| 530 | Cl_clus100546_Contig1 | ---NA---                                                                                                        | 454  | 0  | -         | - |        |
|     |                       |                                                                                                                 |      |    |           |   |        |
| 531 | Cl_clus100548_Contig1 | aedes aegypti 60s ribosomal protein l23 partial mrna                                                            | 472  | 13 | 4.10E-112 |   | 76.08% |
| 532 | Cl_clus100550_Contig1 | ---NA---                                                                                                        | 340  | 0  | -         | - |        |
| 533 | Cl_clus100551_Contig1 | ---NA---                                                                                                        | 466  | 0  | -         | - |        |
| 534 | Cl_clus100553_Contig1 | ---NA---                                                                                                        | 1008 | 0  | -         | - |        |
| 535 | Cl_clus100554_Contig1 | ---NA---                                                                                                        | 1419 | 0  | -         | - |        |
| 536 | Cl_clus100552_Contig1 | ---NA---                                                                                                        | 499  | 0  | -         | - |        |
| 537 | Cl_clus100556_Contig1 | ---NA---                                                                                                        | 567  | 0  | -         | - |        |
| 538 | Cl_clus100557_Contig1 | ---NA---                                                                                                        | 675  | 0  | -         | - |        |
| 539 | Cl_clus100558_Contig2 | ---NA---                                                                                                        | 501  | 0  | -         | - |        |
| 540 | Cl_clus100559_Contig1 | ---NA---                                                                                                        | 978  | 0  | -         | - |        |
| 541 | Cl_clus100560_Contig1 | ---NA---                                                                                                        | 908  | 0  | -         | - |        |
| 542 | Cl_clus100561_Contig1 | ---NA---                                                                                                        | 738  | 0  | -         | - |        |
| 543 | Cl_clus100555_Contig1 | gryllus bimaculatus gbcontig20780                                                                               | 1171 | 1  | 1.10E-16  |   | 85.00% |
| 544 | Cl_clus100562_Contig1 | ---NA---                                                                                                        | 1401 | 0  | -         | - |        |
| 545 | Cl_clus100563_Contig1 | ---NA---                                                                                                        | 665  | 0  | -         | - |        |
| 546 | Cl_clus100566_Contig1 | ---NA---                                                                                                        | 729  | 0  | -         | - |        |
| 547 | Cl_clus100567_Contig1 | ---NA---                                                                                                        | 804  | 0  | -         | - |        |
| 548 | Cl_clus100564_Contig1 | ---NA---                                                                                                        | 456  | 0  | -         | - |        |
| 549 | Cl_clus100568_Contig1 | ---NA---                                                                                                        | 451  | 0  | -         | - |        |
| 550 | Cl_clus100565_Contig1 | ---NA---                                                                                                        | 621  | 0  | -         | - |        |
| 551 | Cl_clus100571_Contig1 | ---NA---                                                                                                        | 531  | 0  | -         | - |        |
| 552 | Cl_clus100572_Contig1 | ---NA---                                                                                                        | 461  | 0  | -         | - |        |
| 553 | Cl_clus100573_Contig1 | ---NA---                                                                                                        | 400  | 0  | -         | - |        |
| 554 | Cl_clus100569_Contig1 | ---NA---                                                                                                        | 540  | 0  | -         | - |        |
| 555 | Cl_clus100570_Contig1 | ---NA---                                                                                                        | 311  | 0  | -         | - |        |
| 556 | Cl_clus100574_Contig1 | ---NA---                                                                                                        | 417  | 0  | -         | - |        |
| 557 | Cl_clus100575_Contig1 | ---NA---                                                                                                        | 1292 | 0  | -         | - |        |
| 558 | Cl_clus100576_Contig1 | ---NA---                                                                                                        | 1102 | 0  | -         | - |        |
| 559 | Cl_clus100577_Contig1 | fenneropenaeus chinensis glucose-regulated protein 78 complete cds                                              | 621  | 10 | 7.10E-136 |   | 74.60% |
| 560 | Cl_clus100578_Contig1 | ---NA---                                                                                                        | 556  | 0  | -         | - |        |

|     |                       |                                                                                          |     |    |           |        |  |
|-----|-----------------------|------------------------------------------------------------------------------------------|-----|----|-----------|--------|--|
| 561 | Cl_clus100579_Contig1 | ---NA---                                                                                 | 769 | 0  | -         | -      |  |
| 562 | Cl_clus100580_Contig1 | ---NA---                                                                                 | 634 | 0  | -         | -      |  |
| 563 | Cl_clus100581_Contig1 | ---NA---                                                                                 | 318 | 0  | -         | -      |  |
| 564 | Cl_clus100582_Contig1 | ---NA---                                                                                 | 214 | 0  | -         | -      |  |
| 565 | Cl_clus100583_Contig1 | ---NA---                                                                                 | 468 | 0  | -         | -      |  |
| 566 | Cl_clus100584_Contig1 | ---NA---                                                                                 | 381 | 0  | -         | -      |  |
| 567 | Cl_clus100585_Contig1 | ---NA---                                                                                 | 563 | 0  | -         | -      |  |
| 568 | Cl_clus100586_Contig1 | ---NA---                                                                                 | 356 | 0  | -         | -      |  |
| 569 | Cl_clus100587_Contig1 | ---NA---                                                                                 | 379 | 0  | -         | -      |  |
| 570 | Cl_clus100588_Contig1 | ---NA---                                                                                 | 427 | 0  | -         | -      |  |
| 571 | Cl_clus100589_Contig1 | ---NA---                                                                                 | 550 | 0  | -         | -      |  |
| 572 | Cl_clus100590_Contig1 | jaculus jaculus junctophilin 1 transcript variant mrna                                   | 650 | 20 | 2.40E-91  | 74.00% |  |
| 573 | Cl_clus100591_Contig1 | Locusta migratoria partial mRNA for hypothetical protein (ORF19), clone lmigEST19        | 750 | 1  | 4.20E-32  | 75.00% |  |
| 574 | Cl_clus100593_Contig1 | ---NA---                                                                                 | 766 | 0  | -         | -      |  |
| 575 | Cl_clus100594_Contig1 | ---NA---                                                                                 | 679 | 0  | -         | -      |  |
| 576 | Cl_clus100595_Contig1 | ---NA---                                                                                 | 658 | 0  | -         | -      |  |
| 577 | Cl_clus100596_Contig1 | ---NA---                                                                                 | 217 | 0  | -         | -      |  |
| 578 | Cl_clus100592_Contig1 | ---NA---                                                                                 | 909 | 0  | -         | -      |  |
| 579 | Cl_clus100597_Contig1 | heliiothis virescens secreted protein acidic and rich in cysteine-like complete sequence | 892 | 3  | 4.40E-115 | 73.67% |  |
| 580 | Cl_clus100598_Contig1 | ---NA---                                                                                 | 689 | 0  | -         | -      |  |
| 581 | Cl_clus100600_Contig1 | ---NA---                                                                                 | 690 | 0  | -         | -      |  |
| 582 | Cl_clus100599_Contig1 | ---NA---                                                                                 | 989 | 0  | -         | -      |  |
| 583 | Cl_clus100601_Contig1 | ---NA---                                                                                 | 456 | 0  | -         | -      |  |
| 584 | Cl_clus100602_Contig1 | ---NA---                                                                                 | 734 | 0  | -         | -      |  |
| 585 | Cl_clus100603_Contig1 | ---NA---                                                                                 | 738 | 0  | -         | -      |  |
| 586 | Cl_clus100604_Contig1 | ---NA---                                                                                 | 517 | 0  | -         | -      |  |
| 587 | Cl_clus100605_Contig1 | ---NA---                                                                                 | 424 | 0  | -         | -      |  |
| 588 | Cl_clus100606_Contig1 | ---NA---                                                                                 | 658 | 0  | -         | -      |  |

|     |                       |                                                              |      |    |          |        |  |
|-----|-----------------------|--------------------------------------------------------------|------|----|----------|--------|--|
| 589 | Cl_clus100607_Contig1 | ---NA---                                                     | 949  | 0  | -        | -      |  |
| 590 | Cl_clus100608_Contig1 | ---NA---                                                     | 779  | 0  | -        | -      |  |
| 591 | Cl_clus100609_Contig1 | ---NA---                                                     | 746  | 0  | -        | -      |  |
| 592 | Cl_clus100610_Contig1 | ---NA---                                                     | 579  | 0  | -        | -      |  |
| 593 | Cl_clus100611_Contig1 | ---NA---                                                     | 789  | 0  | -        | -      |  |
| 594 | Cl_clus100614_Contig1 | ---NA---                                                     | 534  | 0  | -        | -      |  |
| 595 | Cl_clus100615_Contig1 | ---NA---                                                     | 1162 | 0  | -        | -      |  |
| 596 | Cl_clus100612_Contig1 | ---NA---                                                     | 890  | 0  | -        | -      |  |
| 597 | Cl_clus100613_Contig1 | ---NA---                                                     | 785  | 0  | -        | -      |  |
| 598 | Cl_clus100616_Contig1 | ---NA---                                                     | 418  | 0  | -        | -      |  |
| 599 | Cl_clus100617_Contig1 | ---NA---                                                     | 719  | 0  | -        | -      |  |
| 600 | Cl_clus100618_Contig1 | ---NA---                                                     | 386  | 0  | -        | -      |  |
| 601 | Cl_clus100619_Contig1 | ---NA---                                                     | 322  | 0  | -        | -      |  |
| 602 | Cl_clus100620_Contig1 | ---NA---                                                     | 807  | 0  | -        | -      |  |
| 603 | Cl_clus100621_Contig1 | ---NA---                                                     | 303  | 0  | -        | -      |  |
| 604 | Cl_clus100622_Contig1 | ---NA---                                                     | 545  | 0  | -        | -      |  |
| 605 | Cl_clus100623_Contig1 | callorhinchus milii clone ribosomal protein l34 complete cds | 660  | 15 | 6.60E-86 | 79.80% |  |
| 606 | Cl_clus100624_Contig1 | plutella xylostella mrna for ribosomal protein complete cds  | 512  | 1  | 9.80E-89 | 78.00% |  |
| 607 | Cl_clus100625_Contig1 | ---NA---                                                     | 276  | 0  | -        | -      |  |
| 608 | Cl_clus100626_Contig1 | ---NA---                                                     | 535  | 0  | -        | -      |  |
| 609 | Cl_clus100627_Contig1 | ---NA---                                                     | 587  | 0  | -        | -      |  |
| 610 | Cl_clus100628_Contig1 | ---NA---                                                     | 221  | 0  | -        | -      |  |
| 611 | Cl_clus100629_Contig1 | ---NA---                                                     | 613  | 0  | -        | -      |  |
| 612 | Cl_clus100631_Contig1 | ---NA---                                                     | 396  | 0  | -        | -      |  |
| 613 | Cl_clus100632_Contig1 | ---NA---                                                     | 532  | 0  | -        | -      |  |
| 614 | Cl_clus100633_Contig1 | ---NA---                                                     | 855  | 0  | -        | -      |  |
| 615 | Cl_clus100634_Contig1 | ---NA---                                                     | 567  | 0  | -        | -      |  |
| 616 | Cl_clus100635_Contig1 | ---NA---                                                     | 454  | 0  | -        | -      |  |
| 617 | Cl_clus100636_Contig1 | ---NA---                                                     | 840  | 0  | -        | -      |  |
| 618 | Cl_clus100637_Contig1 | ---NA---                                                     | 363  | 0  | -        | -      |  |

|     |                       |                                                                                                      |      |    |           |        |  |
|-----|-----------------------|------------------------------------------------------------------------------------------------------|------|----|-----------|--------|--|
| 619 | Cl_clus100638_Contig1 | ---NA---                                                                                             | 377  | 0  | -         | -      |  |
| 620 | Cl_clus100639_Contig1 | bombus terrestris 60s ribosomal protein l9-like mrna                                                 | 610  | 2  | 1.20E-107 | 75.00% |  |
| 621 | Cl_clus100640_Contig1 | ---NA---                                                                                             | 286  | 0  | -         | -      |  |
| 622 | Cl_clus100641_Contig1 | ---NA---                                                                                             | 540  | 0  | -         | -      |  |
| 623 | Cl_clus100642_Contig1 | papilio xuthus mrna for ribosomal protein complete sequence id: px-0166                              | 323  | 2  | 2.50E-49  | 78.00% |  |
| 624 | Cl_clus100643_Contig1 | ---NA---                                                                                             | 1158 | 0  | -         | -      |  |
| 625 | Cl_clus100644_Contig1 | ---NA---                                                                                             | 497  | 0  | -         | -      |  |
| 626 | Cl_clus100645_Contig1 | papilio polytes mrna for atpase complete sequence id: pp-0109                                        | 315  | 10 | 6.20E-19  | 83.80% |  |
| 627 | Cl_clus100646_Contig1 | ---NA---                                                                                             | 837  | 0  | -         | -      |  |
| 628 | Cl_clus100647_Contig1 | ---NA---                                                                                             | 1533 | 0  | -         | -      |  |
| 629 | Cl_clus100648_Contig1 | anopheles gambiae pest agap010147-pa complete cds                                                    | 869  | 20 | 0.00E+00  | 81.45% |  |
| 630 | Cl_clus100649_Contig1 | nasonia vitripennis muscle lim protein transcript variant mrna                                       | 2180 | 2  | 1.30E-151 | 73.50% |  |
| 631 | Cl_clus100651_Contig1 | ---NA---                                                                                             | 779  | 0  | -         | -      |  |
| 632 | Cl_clus100653_Contig1 | ---NA---                                                                                             | 701  | 0  | -         | -      |  |
| 633 | Cl_clus100652_Contig1 | ---NA---                                                                                             | 620  | 0  | -         | -      |  |
| 634 | Cl_clus100654_Contig1 | ---NA---                                                                                             | 1143 | 0  | -         | -      |  |
| 635 | Cl_clus100655_Contig1 | ---NA---                                                                                             | 296  | 0  | -         | -      |  |
| 636 | Cl_clus100656_Contig1 | ---NA---                                                                                             | 256  | 0  | -         | -      |  |
| 637 | Cl_clus100657_Contig1 | ---NA---                                                                                             | 768  | 0  | -         | -      |  |
| 638 | Cl_clus100658_Contig1 | ---NA---                                                                                             | 413  | 0  | -         | -      |  |
| 639 | Cl_clus100659_Contig1 | ---NA---                                                                                             | 869  | 0  | -         | -      |  |
| 640 | Cl_clus100660_Contig1 | ---NA---                                                                                             | 485  | 0  | -         | -      |  |
| 641 | Cl_clus100663_Contig1 | anopheles gambiae pest agap010750-pa complete cds                                                    | 413  | 1  | 3.80E-99  | 80.00% |  |
| 642 | Cl_clus100664_Contig1 | ---NA---                                                                                             | 538  | 0  | -         | -      |  |
| 643 | Cl_clus100630_Contig1 | helicoverpa armigera heat shock protein 90 complete cds                                              | 961  | 20 | 1.70E-171 | 79.05% |  |
| 644 | Cl_clus100665_Contig1 | ---NA---                                                                                             | 802  | 0  | -         | -      |  |
| 645 | Cl_clus100667_Contig1 | ---NA---                                                                                             | 532  | 0  | -         | -      |  |
| 646 | Cl_clus100668_Contig1 | entoria okinawaensis mitochondrial complete genome                                                   | 545  | 20 | 1.20E-157 | 77.05% |  |
| 647 | Cl_clus100669_Contig1 | ---NA---                                                                                             | 724  | 0  | -         | -      |  |
| 648 | Cl_clus100670_Contig1 | ---NA---                                                                                             | 533  | 0  | -         | -      |  |
| 649 | Cl_clus100671_Contig1 | ---NA---                                                                                             | 579  | 0  | -         | -      |  |
| 650 | Cl_clus100672_Contig1 | papilio xuthus mrna for adp ribosylation complete sequence id: px-0305                               | 501  | 10 | 9.60E-70  | 78.30% |  |
| 651 | Cl_clus100673_Contig1 | ---NA---                                                                                             | 448  | 0  | -         | -      |  |
| 652 | Cl_clus100674_Contig1 | acyrthosiphon pisum clone: full-insert cDNA sequence based on ests (5'-est: 3'-est aci2aaf3yo12bbm1) | 355  | 1  | 7.60E-25  | 75.00% |  |
| 653 | Cl_clus100675_Contig1 | ---NA---                                                                                             | 1001 | 0  | -         | -      |  |
| 654 | Cl_clus100676_Contig1 | ---NA---                                                                                             | 731  | 0  | -         | -      |  |
| 655 | Cl_clus100677_Contig1 | ---NA---                                                                                             | 699  | 0  | -         | -      |  |
| 656 | Cl_clus100678_Contig1 | ---NA---                                                                                             | 287  | 0  | -         | -      |  |
| 657 | Cl_clus100679_Contig1 | ---NA---                                                                                             | 653  | 0  | -         | -      |  |
| 658 | Cl_clus100680_Contig1 | riportus pedestris mrna for ribosomal protein complete sequence id: rped-0117                        | 259  | 1  | 2.10E-17  | 72.00% |  |
| 659 | Cl_clus100681_Contig1 | callorhinchus milii clone 40s ribosomal protein s11 complete cds                                     | 444  | 13 | 1.10E-93  | 79.69% |  |
| 660 | Cl_clus100682_Contig1 | ---NA---                                                                                             | 1183 | 0  | -         | -      |  |
| 661 | Cl_clus100650_Contig1 | ---NA---                                                                                             | 952  | 0  | -         | -      |  |
| 662 | Cl_clus100683_Contig1 | ---NA---                                                                                             | 778  | 0  | -         | -      |  |
| 663 | Cl_clus100684_Contig1 | ---NA---                                                                                             | 351  | 0  | -         | -      |  |
| 664 | Cl_clus100685_Contig1 | neohirasea japonica mitochondrial partial genome                                                     | 839  | 20 | 0.00E+00  | 84.10% |  |
| 665 | Cl_clus100687_Contig1 | nasonia vitripennis 60s ribosomal protein l18a- transcript variant 2 mrna                            | 597  | 3  | 6.80E-98  | 75.33% |  |
| 666 | Cl_clus100688_Contig1 | diaphorina citri ribosomal protein l19e complete cds                                                 | 634  | 20 | 9.50E-122 | 77.60% |  |
| 667 | Cl_clus100689_Contig1 | ---NA---                                                                                             | 500  | 0  | -         | -      |  |
| 668 | Cl_clus100690_Contig1 | ---NA---                                                                                             | 1041 | 0  | -         | -      |  |
| 669 | Cl_clus100691_Contig1 | ---NA---                                                                                             | 1342 | 0  | -         | -      |  |
| 670 | Cl_clus100692_Contig1 | ---NA---                                                                                             | 633  | 0  | -         | -      |  |
| 671 | Cl_clus100693_Contig1 | ---NA---                                                                                             | 718  | 0  | -         | -      |  |
| 672 | Cl_clus100694_Contig1 | papilio xuthus mrna for cg6803- complete clone: psg25                                                | 611  | 1  | 1.30E-18  | 76.00% |  |
| 673 | Cl_clus100695_Contig1 | ---NA---                                                                                             | 767  | 0  | -         | -      |  |

|     |                       |                                                                          |      |    |           |   |        |
|-----|-----------------------|--------------------------------------------------------------------------|------|----|-----------|---|--------|
| 674 | Cl_clus100697_Contig1 | ---NA---                                                                 | 974  | 0  | -         | - |        |
| 675 | Cl_clus100698_Contig1 | ---NA---                                                                 | 748  | 0  | -         | - |        |
| 676 | Cl_clus100699_Contig1 | <i>gryllus bimaculatus</i> gbcontig07916                                 | 579  | 1  | 2.80E-20  |   | 87.00% |
| 677 | Cl_clus100696_Contig1 | ---NA---                                                                 | 662  | 0  | -         | - |        |
| 678 | Cl_clus100700_Contig1 | <i>monodelphis domestica</i> 60s ribosomal protein l26-like mrna         | 488  | 3  | 4.80E-86  |   | 75.33% |
| 679 | Cl_clus100701_Contig1 | ---NA---                                                                 | 402  | 0  | -         | - |        |
| 680 | Cl_clus100705_Contig1 | ---NA---                                                                 | 474  | 0  | -         | - |        |
| 681 | Cl_clus100704_Contig1 | ---NA---                                                                 | 1675 | 0  | -         | - |        |
| 682 | Cl_clus100706_Contig1 | ---NA---                                                                 | 604  | 0  | -         | - |        |
| 683 | Cl_clus100707_Contig1 | ---NA---                                                                 | 1326 | 0  | -         | - |        |
| 684 | Cl_clus100709_Contig1 | ---NA---                                                                 | 533  | 0  | -         | - |        |
| 685 | Cl_clus100710_Contig1 | ---NA---                                                                 | 792  | 0  | -         | - |        |
| 686 | Cl_clus100711_Contig1 | <i>monochamus alternatus</i> adenine nucleotide translocase complete cds | 1739 | 20 | 4.90E-175 |   | 70.80% |
| 687 | Cl_clus100712_Contig1 | ---NA---                                                                 | 905  | 0  | -         | - |        |
| 688 | Cl_clus100713_Contig1 | ---NA---                                                                 | 958  | 0  | -         | - |        |
| 689 | Cl_clus100714_Contig1 | <i>locusta migratoria</i> isolate ii-11 csp partial cds                  | 615  | 4  | 2.30E-15  |   | 68.75% |
| 690 | Cl_clus100716_Contig1 | <i>neohirasea japonica</i> mitochondrial partial genome                  | 1648 | 20 | 1.40E-124 |   | 84.65% |
| 691 | Cl_clus100717_Contig1 | ---NA---                                                                 | 334  | 0  | -         | - |        |
| 692 | Cl_clus100718_Contig1 | ---NA---                                                                 | 587  | 0  | -         | - |        |
| 693 | Cl_clus100719_Contig1 | ---NA---                                                                 | 820  | 0  | -         | - |        |
| 694 | Cl_clus100720_Contig1 | ---NA---                                                                 | 427  | 0  | -         | - |        |
| 695 | Cl_clus100721_Contig1 | ---NA---                                                                 | 712  | 0  | -         | - |        |
| 696 | Cl_clus100722_Contig1 | ---NA---                                                                 | 613  | 0  | -         | - |        |
| 697 | Cl_clus100723_Contig1 | ---NA---                                                                 | 446  | 0  | -         | - |        |
| 698 | Cl_clus100724_Contig1 | ---NA---                                                                 | 282  | 0  | -         | - |        |
| 699 | Cl_clus100725_Contig1 | ---NA---                                                                 | 547  | 0  | -         | - |        |
| 700 | Cl_clus100726_Contig1 | ---NA---                                                                 | 296  | 0  | -         | - |        |
| 701 | Cl_clus100728_Contig1 | ---NA---                                                                 | 763  | 0  | -         | - |        |
| 702 | Cl_clus100729_Contig1 | ---NA---                                                                 | 653  | 0  | -         | - |        |
| 703 | Cl_clus100730_Contig1 | ---NA---                                                                 | 637  | 0  | -         | - |        |

|     |                       |                                                                                                                |     |    |           |   |        |
|-----|-----------------------|----------------------------------------------------------------------------------------------------------------|-----|----|-----------|---|--------|
| 704 | Cl_clus100727_Contig1 | ---NA---                                                                                                       | 343 | 0  | -         | - |        |
| 705 | Cl_clus100731_Contig1 | ---NA---                                                                                                       | 382 | 0  | -         | - |        |
| 706 | Cl_clus100732_Contig1 | ---NA---                                                                                                       | 257 | 0  | -         | - |        |
| 707 | Cl_clus100733_Contig1 | <i>oryctolagus cuniculus</i> ribosomal protein l10a-like mrna                                                  | 836 | 17 | 2.00E-144 |   | 73.35% |
| 708 | Cl_clus100734_Contig1 | ---NA---                                                                                                       | 823 | 0  | -         | - |        |
| 709 | Cl_clus100735_Contig1 | ---NA---                                                                                                       | 315 | 0  | -         | - |        |
| 710 | Cl_clus100736_Contig1 | ---NA---                                                                                                       | 393 | 0  | -         | - |        |
| 711 | Cl_clus100737_Contig1 | <i>tribolium castaneum</i> z9 acyl- desaturase b mrna                                                          | 329 | 1  | 4.40E-21  |   | 71.00% |
| 712 | Cl_clus100738_Contig1 | ---NA---                                                                                                       | 240 | 0  | -         | - |        |
| 713 | Cl_clus100739_Contig1 | ---NA---                                                                                                       | 882 | 0  | -         | - |        |
| 714 | Cl_clus100740_Contig1 | <i>drosophila melanogaster</i> mip20342 full insert cdna                                                       | 465 | 10 | 1.70E-15  |   | 70.00% |
| 715 | Cl_clus100741_Contig1 | ---NA---                                                                                                       | 661 | 0  | -         | - |        |
| 716 | Cl_clus100742_Contig1 | ---NA---                                                                                                       | 564 | 0  | -         | - |        |
| 717 | Cl_clus100743_Contig1 | <i>gryllus bimaculatus</i> gbcontig30540                                                                       | 606 | 1  | 5.30E-17  |   | 81.00% |
| 718 | Cl_clus100702_Contig1 | ---NA---                                                                                                       | 395 | 0  | -         | - |        |
| 719 | Cl_clus100708_Contig1 | ---NA---                                                                                                       | 516 | 0  | -         | - |        |
| 720 | Cl_clus100703_Contig1 | <i>gryllus bimaculatus</i> gbcontig20780                                                                       | 691 | 1  | 6.10E-17  |   | 85.00% |
| 721 | Cl_clus100744_Contig1 | ---NA---                                                                                                       | 532 | 0  | -         | - |        |
| 722 | Cl_clus100745_Contig1 | <i>ornithorhynchus anatinus</i> 40s ribosomal protein s10-like mrna                                            | 402 | 3  | 1.80E-52  |   | 74.67% |
| 723 | Cl_clus100746_Contig1 | <i>ictalurus furcatus</i> clone cbzc3255 guanine nucleotide-binding protein subunit beta-2-like 1 complete cds | 535 | 1  | 2.00E-110 |   | 77.00% |
| 724 | Cl_clus100747_Contig1 | ---NA---                                                                                                       | 316 | 0  | -         | - |        |
| 725 | Cl_clus100748_Contig1 | <i>cryptocercus punctulatus</i> ribosomal protein s18 complete cds                                             | 592 | 5  | 1.10E-107 |   | 70.40% |
| 726 | Cl_clus100749_Contig1 | ---NA---                                                                                                       | 358 | 0  | -         | - |        |
| 727 | Cl_clus100750_Contig1 | ---NA---                                                                                                       | 878 | 0  | -         | - |        |
| 728 | Cl_clus100751_Contig1 | <i>ixodes scapularis</i> cytochrome mrna                                                                       | 649 | 4  | 1.60E-74  |   | 80.25% |
| 729 | Cl_clus100752_Contig1 | ---NA---                                                                                                       | 693 | 0  | -         | - |        |
| 730 | Cl_clus100753_Contig1 | ---NA---                                                                                                       | 706 | 0  | -         | - |        |
| 731 | Cl_clus100754_Contig1 | ---NA---                                                                                                       | 383 | 0  | -         | - |        |
| 732 | Cl_clus100755_Contig1 | ---NA---                                                                                                       | 410 | 0  | -         | - |        |

|     |                       |                                                        |     |   |          |        |  |
|-----|-----------------------|--------------------------------------------------------|-----|---|----------|--------|--|
| 733 | Cl_clus100756_Contig1 | ---NA---                                               | 581 | 0 | -        | -      |  |
| 734 | Cl_clus100757_Contig1 | ---NA---                                               | 265 | 0 | -        | -      |  |
| 735 | Cl_clus100758_Contig1 | ---NA---                                               | 497 | 0 | -        | -      |  |
| 736 | Cl_clus100759_Contig1 | ---NA---                                               | 758 | 0 | -        | -      |  |
| 737 | Cl_clus100760_Contig1 | ---NA---                                               | 476 | 0 | -        | -      |  |
| 738 | Cl_clus100761_Contig1 | ---NA---                                               | 857 | 0 | -        | -      |  |
| 739 | Cl_clus100762_Contig1 | ---NA---                                               | 616 | 0 | -        | -      |  |
| 740 | Cl_clus100763_Contig1 | ---NA---                                               | 334 | 0 | -        | -      |  |
| 741 | Cl_clus100765_Contig1 | ---NA---                                               | 291 | 0 | -        | -      |  |
| 742 | Cl_clus100766_Contig1 | ---NA---                                               | 398 | 0 | -        | -      |  |
| 743 | Cl_clus100767_Contig1 | ---NA---                                               | 787 | 0 | -        | -      |  |
| 744 | Cl_clus100768_Contig1 | ---NA---                                               | 467 | 0 | -        | -      |  |
| 745 | Cl_clus100764_Contig1 | ---NA---                                               | 276 | 0 | -        | -      |  |
| 746 | Cl_clus100769_Contig1 | ---NA---                                               | 253 | 0 | -        | -      |  |
| 747 | Cl_clus100770_Contig1 | ---NA---                                               | 322 | 0 | -        | -      |  |
| 748 | Cl_clus100771_Contig1 | ---NA---                                               | 371 | 0 | -        | -      |  |
| 749 | Cl_clus100772_Contig1 | ---NA---                                               | 548 | 0 | -        | -      |  |
| 750 | Cl_clus100773_Contig1 | ---NA---                                               | 734 | 0 | -        | -      |  |
| 751 | Cl_clus100774_Contig1 | ---NA---                                               | 435 | 0 | -        | -      |  |
| 752 | Cl_clus100775_Contig1 | ---NA---                                               | 443 | 0 | -        | -      |  |
| 753 | Cl_clus100776_Contig1 | ---NA---                                               | 465 | 0 | -        | -      |  |
| 754 | Cl_clus100777_Contig1 | ---NA---                                               | 721 | 0 | -        | -      |  |
| 755 | Cl_clus100778_Contig1 | ---NA---                                               | 520 | 0 | -        | -      |  |
| 756 | Cl_clus100779_Contig1 | oryzias latipes tumor suppressor candidate 3-like mrna | 771 | 1 | 1.00E-52 | 69.00% |  |
| 757 | Cl_clus100780_Contig1 | ---NA---                                               | 285 | 0 | -        | -      |  |
| 758 | Cl_clus100781_Contig1 | ---NA---                                               | 241 | 0 | -        | -      |  |
| 759 | Cl_clus100782_Contig1 | ---NA---                                               | 368 | 0 | -        | -      |  |
| 760 | Cl_clus100783_Contig1 | ---NA---                                               | 469 | 0 | -        | -      |  |
| 761 | Cl_clus100784_Contig1 | ---NA---                                               | 449 | 0 | -        | -      |  |

|     |                       |                                                                                                      |     |    |           |        |  |
|-----|-----------------------|------------------------------------------------------------------------------------------------------|-----|----|-----------|--------|--|
| 762 | Cl_clus100785_Contig1 | aplysia californica nadh-ubiquinone oxidoreductase 75 kda mitochondrial-like transcript variant mrna | 613 | 17 | 1.00E-152 | 75.41% |  |
| 763 | Cl_clus100786_Contig1 | ---NA---                                                                                             | 592 | 0  | -         | -      |  |
| 764 | Cl_clus100787_Contig1 | ---NA---                                                                                             | 504 | 0  | -         | -      |  |
| 765 | Cl_clus100788_Contig1 | ---NA---                                                                                             | 412 | 0  | -         | -      |  |
| 766 | Cl_clus100789_Contig1 | ---NA---                                                                                             | 751 | 0  | -         | -      |  |
| 767 | Cl_clus100790_Contig1 | ---NA---                                                                                             | 362 | 0  | -         | -      |  |
| 768 | Cl_clus100791_Contig1 | ---NA---                                                                                             | 372 | 0  | -         | -      |  |
| 769 | Cl_clus100792_Contig1 | ---NA---                                                                                             | 600 | 0  | -         | -      |  |
| 770 | Cl_clus100793_Contig1 | ---NA---                                                                                             | 320 | 0  | -         | -      |  |
| 771 | Cl_clus100794_Contig1 | ---NA---                                                                                             | 301 | 0  | -         | -      |  |
| 772 | Cl_clus100795_Contig1 | ---NA---                                                                                             | 393 | 0  | -         | -      |  |
| 773 | Cl_clus100796_Contig1 | ---NA---                                                                                             | 280 | 0  | -         | -      |  |
| 774 | Cl_clus100797_Contig1 | ---NA---                                                                                             | 210 | 0  | -         | -      |  |
| 775 | Cl_clus100799_Contig1 | gryllus bimaculatus gbcontig06341                                                                    | 343 | 1  | 1.50E-14  | 80.00% |  |
| 776 | Cl_clus100798_Contig1 | ---NA---                                                                                             | 800 | 0  | -         | -      |  |
| 777 | Cl_clus100800_Contig1 | ---NA---                                                                                             | 677 | 0  | -         | -      |  |
| 778 | Cl_clus100801_Contig1 | ---NA---                                                                                             | 459 | 0  | -         | -      |  |
| 779 | Cl_clus100802_Contig1 | ---NA---                                                                                             | 484 | 0  | -         | -      |  |
| 780 | Cl_clus100803_Contig1 | ---NA---                                                                                             | 379 | 0  | -         | -      |  |
| 781 | Cl_clus100804_Contig1 | ---NA---                                                                                             | 330 | 0  | -         | -      |  |
| 782 | Cl_clus100805_Contig1 | ---NA---                                                                                             | 373 | 0  | -         | -      |  |
| 783 | Cl_clus100806_Contig1 | ---NA---                                                                                             | 962 | 0  | -         | -      |  |
| 784 | Cl_clus100807_Contig1 | ---NA---                                                                                             | 757 | 0  | -         | -      |  |
| 785 | Cl_clus100809_Contig1 | ---NA---                                                                                             | 871 | 0  | -         | -      |  |
| 786 | Cl_clus100810_Contig1 | tribolium castaneum agap010429-pa mrna                                                               | 393 | 1  | 2.30E-76  | 78.00% |  |
| 787 | Cl_clus100811_Contig1 | ---NA---                                                                                             | 382 | 0  | -         | -      |  |
| 788 | Cl_clus100808_Contig1 | ---NA---                                                                                             | 301 | 0  | -         | -      |  |
| 789 | Cl_clus100812_Contig1 | ---NA---                                                                                             | 687 | 0  | -         | -      |  |
| 790 | Cl_clus100813_Contig1 | ---NA---                                                                                             | 332 | 0  | -         | -      |  |

|                           |                                                              |      |    |          |        |  |
|---------------------------|--------------------------------------------------------------|------|----|----------|--------|--|
| 791 Cl_clus100814_Contig1 | ---NA---                                                     | 423  | 0  | -        | -      |  |
| 792 Cl_clus100815_Contig1 | plutella xylostella ryanodine receptor complete cds          | 899  | 8  | 0.00E+00 | 76.88% |  |
| 793 Cl_clus100816_Contig1 | ---NA---                                                     | 328  | 0  | -        | -      |  |
| 794 Cl_clus100817_Contig1 | ---NA---                                                     | 537  | 0  | -        | -      |  |
| 795 Cl_clus100818_Contig1 | ---NA---                                                     | 317  | 0  | -        | -      |  |
| 796 Cl_clus100819_Contig1 | ---NA---                                                     | 370  | 0  | -        | -      |  |
| 797 Cl_clus100820_Contig1 | ---NA---                                                     | 381  | 0  | -        | -      |  |
| 798 Cl_clus100821_Contig1 | ---NA---                                                     | 688  | 0  | -        | -      |  |
| 799 Cl_clus100822_Contig1 | ---NA---                                                     | 343  | 0  | -        | -      |  |
| 800 Cl_clus100823_Contig1 | ---NA---                                                     | 871  | 0  | -        | -      |  |
| 801 Cl_clus100824_Contig1 | ---NA---                                                     | 417  | 0  | -        | -      |  |
| 802 Cl_clus100825_Contig1 | nomascus leucogenys s-phase kinase-associated protein 1 mrna | 301  | 20 | 2.30E-49 | 78.00% |  |
| 803 Cl_clus100826_Contig1 | ---NA---                                                     | 681  | 0  | -        | -      |  |
| 804 Cl_clus100827_Contig1 | ---NA---                                                     | 659  | 0  | -        | -      |  |
| 805 Cl_clus100828_Contig1 | salmo salar aspartate cytoplasmic mrna                       | 630  | 6  | 7.30E-60 | 71.17% |  |
| 806 Cl_clus100829_Contig1 | ---NA---                                                     | 228  | 0  | -        | -      |  |
| 807 Cl_clus100830_Contig1 | ---NA---                                                     | 1053 | 0  | -        | -      |  |
| 808 Cl_clus100831_Contig1 | ---NA---                                                     | 285  | 0  | -        | -      |  |
| 809 Cl_clus100832_Contig1 | ---NA---                                                     | 406  | 0  | -        | -      |  |
| 810 Cl_clus100833_Contig1 | ---NA---                                                     | 489  | 0  | -        | -      |  |
| 811 Cl_clus100834_Contig1 | ---NA---                                                     | 808  | 0  | -        | -      |  |
| 812 Cl_clus100835_Contig1 | helicoverpa armigera pupae dna                               | 577  | 1  | 1.30E-24 | 88.00% |  |
| 813 Cl_clus100836_Contig1 | ---NA---                                                     | 566  | 0  | -        | -      |  |
| 814 Cl_clus100837_Contig1 | ---NA---                                                     | 226  | 0  | -        | -      |  |
| 815 Cl_clus100838_Contig1 | ---NA---                                                     | 417  | 0  | -        | -      |  |
| 816 Cl_clus100839_Contig1 | ---NA---                                                     | 605  | 0  | -        | -      |  |
| 817 Cl_clus100840_Contig1 | ---NA---                                                     | 415  | 0  | -        | -      |  |
| 818 Cl_clus100842_Contig1 | ---NA---                                                     | 454  | 0  | -        | -      |  |
| 819 Cl_clus100843_Contig1 | ---NA---                                                     | 319  | 0  | -        | -      |  |
| 820 Cl_clus100844_Contig1 | ---NA---                                                     | 291  | 0  | -        | -      |  |

|                           |                                                                                   |     |    |           |        |
|---------------------------|-----------------------------------------------------------------------------------|-----|----|-----------|--------|
| 821 Cl_clus100845_Contig1 | candida albicans sc5314 histone h3 complete cds                                   | 582 | 20 | 6.20E-92  | 77.45% |
| 822 Cl_clus100846_Contig1 | ---NA---                                                                          | 345 | 0  | -         | -      |
| 823 Cl_clus100847_Contig1 | ---NA---                                                                          | 660 | 0  | -         | -      |
| 824 Cl_clus100848_Contig1 | echinops telfairi nadh dehydrogenase flavoprotein 51kda transcript variant mrna   | 981 | 20 | 0.00E+00  | 75.25% |
| 825 Cl_clus100849_Contig1 | ---NA---                                                                          | 606 | 0  | -         | -      |
| 826 Cl_clus100850_Contig1 | ---NA---                                                                          | 502 | 0  | -         | -      |
| 827 Cl_clus100841_Contig1 | ---NA---                                                                          | 478 | 0  | -         | -      |
| 828 Cl_clus100851_Contig1 | ---NA---                                                                          | 407 | 0  | -         | -      |
| 829 Cl_clus100852_Contig1 | ---NA---                                                                          | 977 | 0  | -         | -      |
| 830 Cl_clus100853_Contig1 | ---NA---                                                                          | 506 | 0  | -         | -      |
| 831 Cl_clus100854_Contig1 | ---NA---                                                                          | 710 | 0  | -         | -      |
| 832 Cl_clus100855_Contig1 | maylandia zebra 40s ribosomal protein s3-like mrna                                | 265 | 5  | 1.20E-58  | 79.20% |
| 833 Cl_clus100856_Contig1 | ---NA---                                                                          | 498 | 0  | -         | -      |
| 834 Cl_clus100857_Contig1 | ---NA---                                                                          | 558 | 0  | -         | -      |
| 835 Cl_clus100858_Contig1 | ---NA---                                                                          | 850 | 0  | -         | -      |
| 836 Cl_clus100859_Contig1 | ---NA---                                                                          | 552 | 0  | -         | -      |
| 837 Cl_clus100860_Contig1 | ---NA---                                                                          | 420 | 0  | -         | -      |
| 838 Cl_clus100861_Contig1 | ---NA---                                                                          | 559 | 0  | -         | -      |
| 839 Cl_clus100862_Contig1 | ---NA---                                                                          | 511 | 0  | -         | -      |
| 840 Cl_clus100863_Contig1 | ---NA---                                                                          | 753 | 0  | -         | -      |
| 841 Cl_clus100864_Contig1 | ---NA---                                                                          | 382 | 0  | -         | -      |
| 842 Cl_clus100865_Contig1 | ---NA---                                                                          | 430 | 0  | -         | -      |
| 843 Cl_clus100866_Contig1 | ---NA---                                                                          | 415 | 0  | -         | -      |
| 844 Cl_clus100867_Contig1 | ---NA---                                                                          | 850 | 0  | -         | -      |
| 845 Cl_clus100868_Contig1 | ---NA---                                                                          | 315 | 0  | -         | -      |
| 846 Cl_clus100869_Contig1 | Locusta migratoria partial mRNA for hypothetical protein (ORF10), clone lmigEST10 | 388 | 1  | 2.10E-32  | 74.00% |
| 847 Cl_clus100870_Contig1 | nasonia vitripennis 40s ribosomal protein s9-like mrna                            | 727 | 2  | 2.00E-118 | 75.00% |
| 848 Cl_clus100871_Contig1 | ---NA---                                                                          | 575 | 0  | -         | -      |

|     |                       |                                                       |      |   |          |   |        |
|-----|-----------------------|-------------------------------------------------------|------|---|----------|---|--------|
| 849 | Cl_clus100872_Contig1 | ---NA---                                              | 429  | 0 | -        | - |        |
| 850 | Cl_clus100873_Contig1 | ---NA---                                              | 503  | 0 | -        | - |        |
| 851 | Cl_clus100874_Contig1 | ---NA---                                              | 346  | 0 | -        | - |        |
| 852 | Cl_clus100875_Contig1 | ---NA---                                              | 483  | 0 | -        | - |        |
| 853 | Cl_clus100876_Contig1 | ---NA---                                              | 209  | 0 | -        | - |        |
| 854 | Cl_clus100877_Contig1 | ---NA---                                              | 658  | 0 | -        | - |        |
| 855 | Cl_clus100878_Contig1 | ---NA---                                              | 415  | 0 | -        | - |        |
| 856 | Cl_clus100879_Contig1 | ---NA---                                              | 394  | 0 | -        | - |        |
| 857 | Cl_clus100880_Contig1 | bombus terrestris 40s ribosomal protein s29-like mrna | 400  | 1 | 2.20E-32 |   | 78.00% |
| 858 | Cl_clus100881_Contig1 | ---NA---                                              | 754  | 0 | -        | - |        |
| 859 | Cl_clus100882_Contig1 | ---NA---                                              | 371  | 0 | -        | - |        |
| 860 | Cl_clus100883_Contig1 | ---NA---                                              | 365  | 0 | -        | - |        |
| 861 | Cl_clus100884_Contig1 | ---NA---                                              | 1313 | 0 | -        | - |        |
| 862 | Cl_clus100886_Contig1 | ---NA---                                              | 465  | 0 | -        | - |        |
| 863 | Cl_clus100887_Contig1 | ---NA---                                              | 338  | 0 | -        | - |        |
| 864 | Cl_clus100888_Contig1 | ---NA---                                              | 723  | 0 | -        | - |        |
| 865 | Cl_clus100885_Contig1 | ---NA---                                              | 405  | 0 | -        | - |        |
| 866 | Cl_clus100891_Contig1 | ---NA---                                              | 296  | 0 | -        | - |        |
| 867 | Cl_clus100892_Contig1 | ---NA---                                              | 827  | 0 | -        | - |        |
| 868 | Cl_clus100893_Contig1 | ---NA---                                              | 766  | 0 | -        | - |        |
| 869 | Cl_clus100889_Contig1 | ---NA---                                              | 486  | 0 | -        | - |        |
| 870 | Cl_clus100894_Contig1 | ---NA---                                              | 652  | 0 | -        | - |        |
| 871 | Cl_clus100895_Contig1 | ---NA---                                              | 567  | 0 | -        | - |        |
| 872 | Cl_clus100896_Contig1 | ---NA---                                              | 745  | 0 | -        | - |        |
| 873 | Cl_clus100890_Contig1 | ---NA---                                              | 246  | 0 | -        | - |        |
| 874 | Cl_clus100897_Contig1 | ---NA---                                              | 685  | 0 | -        | - |        |
| 875 | Cl_clus100898_Contig1 | ---NA---                                              | 741  | 0 | -        | - |        |
| 876 | Cl_clus100899_Contig1 | ---NA---                                              | 474  | 0 | -        | - |        |
| 877 | Cl_clus100900_Contig1 | ---NA---                                              | 559  | 0 | -        | - |        |
| 878 | Cl_clus100901_Contig1 | drosophila virilis gj11017 (dvir\gj11017) mrna        | 265  | 1 | 3.90E-14 |   | 68.00% |

|     |                       |                                                                                                                      |      |    |          |   |        |
|-----|-----------------------|----------------------------------------------------------------------------------------------------------------------|------|----|----------|---|--------|
| 879 | Cl_clus100902_Contig1 | ---NA---                                                                                                             | 525  | 0  | -        | - |        |
| 880 | Cl_clus100903_Contig1 | ---NA---                                                                                                             | 428  | 0  | -        | - |        |
| 881 | Cl_clus100904_Contig1 | ---NA---                                                                                                             | 772  | 0  | -        | - |        |
| 882 | Cl_clus100905_Contig1 | ---NA---                                                                                                             | 508  | 0  | -        | - |        |
| 883 | Cl_clus100906_Contig1 | ---NA---                                                                                                             | 531  | 0  | -        | - |        |
| 884 | Cl_clus100907_Contig1 | ---NA---                                                                                                             | 748  | 0  | -        | - |        |
| 885 | Cl_clus100908_Contig1 | drosophila willistoni gk23837 (dwil\gk23837) mrna                                                                    | 303  | 1  | 8.80E-17 |   | 82.00% |
| 886 | Cl_clus100909_Contig1 | ---NA---                                                                                                             | 306  | 0  | -        | - |        |
| 887 | Cl_clus100911_Contig1 | drosophila melanogaster s-adenosylmethionine synthetase (sam-s) transcript variant mrna                              | 386  | 20 | 7.70E-57 |   | 74.50% |
| 888 | Cl_clus100912_Contig1 | ---NA---                                                                                                             | 565  | 0  | -        | - |        |
| 889 | Cl_clus100910_Contig1 | ---NA---                                                                                                             | 494  | 0  | -        | - |        |
| 890 | Cl_clus100913_Contig1 | ---NA---                                                                                                             | 616  | 0  | -        | - |        |
| 891 | Cl_clus100914_Contig1 | ---NA---                                                                                                             | 420  | 0  | -        | - |        |
| 892 | Cl_clus100915_Contig1 | ---NA---                                                                                                             | 529  | 0  | -        | - |        |
| 893 | Cl_clus100916_Contig1 | ---NA---                                                                                                             | 310  | 0  | -        | - |        |
| 894 | Cl_clus100917_Contig1 | ---NA---                                                                                                             | 536  | 0  | -        | - |        |
| 895 | Cl_clus100918_Contig1 | ---NA---                                                                                                             | 625  | 0  | -        | - |        |
| 896 | Cl_clus100919_Contig1 | ---NA---                                                                                                             | 619  | 0  | -        | - |        |
| 897 | Cl_clus100920_Contig1 | ---NA---                                                                                                             | 348  | 0  | -        | - |        |
| 898 | Cl_clus100921_Contig1 | ---NA---                                                                                                             | 448  | 0  | -        | - |        |
| 899 | Cl_clus100922_Contig1 | ---NA---                                                                                                             | 335  | 0  | -        | - |        |
| 900 | Cl_clus100923_Contig1 | ---NA---                                                                                                             | 1039 | 0  | -        | - |        |
| 901 | Cl_clus100924_Contig1 | ---NA---                                                                                                             | 280  | 0  | -        | - |        |
| 902 | Cl_clus100925_Contig1 | meladema coriacea mrna for ribosomal protein l7ae (rpl7ae gene)                                                      | 470  | 1  | 3.30E-56 |   | 73.00% |
| 903 | Cl_clus100926_Contig1 | papilio xuthus mrna for vacuolar h                                                                                   | 434  | 1  | 1.60E-53 |   | 78.00% |
| 904 | Cl_clus100927_Contig1 | ---NA---                                                                                                             | 447  | 0  | -        | - |        |
| 905 | Cl_clus100928_Contig1 | acanthoxyla prasina isolate cytochrome oxidase subunit i and cytochrome oxidase subunit ii partial cds mitochondrial | 433  | 20 | 0.00E+00 |   | 99.65% |
| 906 | Cl_clus100929_Contig1 | ---NA---                                                                                                             | 1491 | 0  | -        | - |        |



|     |                       |                                                                                   |      |    |           |   |        |
|-----|-----------------------|-----------------------------------------------------------------------------------|------|----|-----------|---|--------|
| 907 | Cl_clus100930_Contig1 | ---NA---                                                                          | 458  | 0  | -         | - |        |
| 908 | Cl_clus100931_Contig1 | ---NA---                                                                          | 647  | 0  | -         | - |        |
| 909 | Cl_clus100932_Contig1 | vitis vinifera ubiquitin-conjugating enzyme e2-17 kda- transcript variant 1 mrna  | 1158 | 11 | 5.50E-52  |   | 73.09% |
| 910 | Cl_clus100933_Contig1 | cnaphalocrocis medinalis ryanodine receptor complete cds                          | 483  | 2  | 1.50E-73  |   | 72.00% |
| 911 | Cl_clus100934_Contig1 | ---NA---                                                                          | 1003 | 0  | -         | - |        |
| 912 | Cl_clus100935_Contig1 | ---NA---                                                                          | 832  | 0  | -         | - |        |
| 913 | Cl_clus100936_Contig1 | ---NA---                                                                          | 727  | 0  | -         | - |        |
| 914 | Cl_clus100937_Contig1 | ---NA---                                                                          | 668  | 0  | -         | - |        |
| 915 | Cl_clus100938_Contig1 | ---NA---                                                                          | 338  | 0  | -         | - |        |
| 916 | Cl_clus100939_Contig1 | callithrix jacchus 60s ribosomal protein l27a-like mrna                           | 543  | 15 | 8.60E-71  |   | 73.07% |
| 917 | Cl_clus100941_Contig1 | ---NA---                                                                          | 725  | 0  | -         | - |        |
| 918 | Cl_clus100942_Contig1 | ---NA---                                                                          | 487  | 0  | -         | - |        |
| 919 | Cl_clus100940_Contig1 | ---NA---                                                                          | 639  | 0  | -         | - |        |
| 920 | Cl_clus100943_Contig1 | ---NA---                                                                          | 204  | 0  | -         | - |        |
| 921 | Cl_clus100944_Contig1 | ---NA---                                                                          | 333  | 0  | -         | - |        |
| 922 | Cl_clus100947_Contig1 | ---NA---                                                                          | 485  | 0  | -         | - |        |
| 923 | Cl_clus100945_Contig1 | ---NA---                                                                          | 649  | 0  | -         | - |        |
| 924 | Cl_clus100946_Contig1 | ---NA---                                                                          | 459  | 0  | -         | - |        |
| 925 | Cl_clus100948_Contig1 | ---NA---                                                                          | 376  | 0  | -         | - |        |
| 926 | Cl_clus100949_Contig1 | ---NA---                                                                          | 724  | 0  | -         | - |        |
| 927 | Cl_clus100950_Contig1 | ---NA---                                                                          | 656  | 0  | -         | - |        |
| 928 | Cl_clus100951_Contig1 | ---NA---                                                                          | 506  | 0  | -         | - |        |
| 929 | Cl_clus100952_Contig1 | gryllus bimaculatus gbcontig28204                                                 | 943  | 14 | 6.10E-120 |   | 72.71% |
| 930 | Cl_clus100953_Contig1 | ---NA---                                                                          | 415  | 0  | -         | - |        |
| 931 | Cl_clus100954_Contig1 | ---NA---                                                                          | 551  | 0  | -         | - |        |
| 932 | Cl_clus100955_Contig1 | ---NA---                                                                          | 361  | 0  | -         | - |        |
| 933 | Cl_clus100956_Contig1 | ---NA---                                                                          | 582  | 0  | -         | - |        |
| 934 | Cl_clus100957_Contig1 | ---NA---                                                                          | 494  | 0  | -         | - |        |
| 935 | Cl_clus100959_Contig1 | ---NA---                                                                          | 682  | 0  | -         | - |        |
| 936 | Cl_clus100958_Contig1 | ---NA---                                                                          | 442  | 0  | -         | - |        |
| 937 | Cl_clus100960_Contig1 | drosophila melanogaster ryanodine receptor 44f (rya-r44f) transcript variant mrna | 583  | 20 | 2.50E-179 |   | 82.90% |
| 938 | Cl_clus100961_Contig1 | ---NA---                                                                          | 499  | 0  | -         | - |        |
| 939 | Cl_clus100962_Contig1 | ---NA---                                                                          | 371  | 0  | -         | - |        |
| 940 | Cl_clus100963_Contig1 | ---NA---                                                                          | 317  | 0  | -         | - |        |
| 941 | Cl_clus100964_Contig1 | ---NA---                                                                          | 351  | 0  | -         | - |        |
| 942 | Cl_clus100966_Contig1 | ---NA---                                                                          | 764  | 0  | -         | - |        |
| 943 | Cl_clus100967_Contig1 | echinops telfairi liver mrna                                                      | 647  | 6  | 1.50E-68  |   | 71.17% |
| 944 | Cl_clus100968_Contig1 | apis florea protein disulfide-isomerase a3-like mrna                              | 901  | 4  | 5.50E-38  |   | 76.50% |
| 945 | Cl_clus100969_Contig1 | ---NA---                                                                          | 671  | 0  | -         | - |        |
| 946 | Cl_clus100971_Contig1 | telmatoscopus amf-2003 ribosomal protein s6 partial cds                           | 646  | 1  | 3.00E-52  |   | 71.00% |
| 947 | Cl_clus100972_Contig1 | ---NA---                                                                          | 768  | 0  | -         | - |        |
| 948 | Cl_clus100973_Contig1 | ---NA---                                                                          | 897  | 0  | -         | - |        |
| 949 | Cl_clus100974_Contig1 | pan troglodytes ribosomal protein l8 mrna                                         | 516  | 20 | 1.20E-87  |   | 75.00% |
| 950 | Cl_clus100975_Contig1 | ---NA---                                                                          | 491  | 0  | -         | - |        |
| 951 | Cl_clus100970_Contig1 | ---NA---                                                                          | 265  | 0  | -         | - |        |
| 952 | Cl_clus100977_Contig1 | ---NA---                                                                          | 694  | 0  | -         | - |        |
| 953 | Cl_clus100978_Contig1 | ---NA---                                                                          | 353  | 0  | -         | - |        |
| 954 | Cl_clus100979_Contig1 | ---NA---                                                                          | 212  | 0  | -         | - |        |
| 955 | Cl_clus100976_Contig1 | ---NA---                                                                          | 304  | 0  | -         | - |        |
| 956 | Cl_clus100965_Contig1 | ---NA---                                                                          | 273  | 0  | -         | - |        |
| 957 | Cl_clus100980_Contig1 | ---NA---                                                                          | 590  | 0  | -         | - |        |
| 958 | Cl_clus100981_Contig1 | ailuropoda melanoleuca ribosomal protein l5 complete cds                          | 704  | 13 | 1.60E-62  |   | 71.31% |
| 959 | Cl_clus100982_Contig1 | ---NA---                                                                          | 376  | 0  | -         | - |        |
| 960 | Cl_clus100984_Contig1 | ---NA---                                                                          | 473  | 0  | -         | - |        |
| 961 | Cl_clus100985_Contig1 | neohirasea japonica mitochondrial partial genome                                  | 818  | 20 | 2.90E-85  |   | 78.60% |
| 962 | Cl_clus100986_Contig1 | ---NA---                                                                          | 528  | 0  | -         | - |        |
| 963 | Cl_clus100987_Contig1 | ---NA---                                                                          | 833  | 0  | -         | - |        |
| 964 | Cl_clus100988_Contig1 | ---NA---                                                                          | 578  | 0  | -         | - |        |

|     |                       |                                                   |      |    |          |   |        |
|-----|-----------------------|---------------------------------------------------|------|----|----------|---|--------|
| 965 | Cl_clus100989_Contig1 | ---NA---                                          | 791  | 0  | -        | - |        |
| 966 | Cl_clus100990_Contig1 | ---NA---                                          | 637  | 0  | -        | - |        |
| 967 | Cl_clus100991_Contig1 | ---NA---                                          | 678  | 0  | -        | - |        |
| 968 | Cl_clus100983_Contig1 | ---NA---                                          | 465  | 0  | -        | - |        |
| 969 | Cl_clus100993_Contig1 | ---NA---                                          | 690  | 0  | -        | - |        |
| 970 | Cl_clus100995_Contig1 | ---NA---                                          | 991  | 0  | -        | - |        |
| 971 | Cl_clus100996_Contig1 | ---NA---                                          | 560  | 0  | -        | - |        |
| 972 | Cl_clus100997_Contig1 | ---NA---                                          | 865  | 0  | -        | - |        |
| 973 | Cl_clus100994_Contig1 | ---NA---                                          | 663  | 0  | -        | - |        |
| 974 | Cl_clus100998_Contig1 | ---NA---                                          | 399  | 0  | -        | - |        |
| 975 | Cl_clus100999_Contig1 | triatoma vitticeps arginine kinase complete cds   | 1787 | 20 | 0.00E+00 |   | 76.45% |
| 976 | Cl_clus100992_Contig1 | ---NA---                                          | 849  | 0  | -        | - |        |
| 977 | Cl_clus101000_Contig1 | ---NA---                                          | 603  | 0  | -        | - |        |
| 978 | Cl_clus101002_Contig1 | papio anubis ubiquitin transcript variant 12 mrna | 311  | 20 | 1.70E-95 |   | 85.00% |
| 979 | Cl_clus101003_Contig1 | periplaneta americana cypmw05 complete cds        | 758  | 1  | 5.20E-12 |   | 94.00% |
| 980 | Cl_clus101004_Contig1 | extatosoma tiaratum mitochondrial complete genome | 827  | 20 | 5.00E-76 |   | 82.50% |
| 981 | Cl_clus101005_Contig1 | ---NA---                                          | 649  | 0  | -        | - |        |
| 982 | Cl_clus101001_Contig1 | ---NA---                                          | 605  | 0  | -        | - |        |
| 983 | Cl_clus101006_Contig1 | ---NA---                                          | 216  | 0  | -        | - |        |
| 984 | Cl_clus101008_Contig1 | ---NA---                                          | 328  | 0  | -        | - |        |
| 985 | Cl_clus101009_Contig1 | ---NA---                                          | 548  | 0  | -        | - |        |
| 986 | Cl_clus101010_Contig1 | ---NA---                                          | 316  | 0  | -        | - |        |
| 987 | Cl_clus101007_Contig1 | ---NA---                                          | 1227 | 0  | -        | - |        |
| 988 | Cl_clus101011_Contig1 | ---NA---                                          | 692  | 0  | -        | - |        |
| 989 | Cl_clus101012_Contig1 | ---NA---                                          | 544  | 0  | -        | - |        |
| 990 | Cl_clus101013_Contig1 | ---NA---                                          | 485  | 0  | -        | - |        |
| 991 | Cl_clus101014_Contig1 | ---NA---                                          | 317  | 0  | -        | - |        |
| 992 | Cl_clus101015_Contig1 | ---NA---                                          | 754  | 0  | -        | - |        |
| 993 | Cl_clus101016_Contig1 | ---NA---                                          | 229  | 0  | -        | - |        |
| 994 | Cl_clus101017_Contig1 | ---NA---                                          | 1179 | 0  | -        | - |        |

|      |                       |                                                                 |     |    |           |   |        |
|------|-----------------------|-----------------------------------------------------------------|-----|----|-----------|---|--------|
| 995  | Cl_clus101018_Contig1 | ---NA---                                                        | 500 | 0  | -         | - |        |
| 996  | Cl_clus101019_Contig1 | ---NA---                                                        | 714 | 0  | -         | - |        |
| 997  | Cl_clus101020_Contig1 | ---NA---                                                        | 297 | 0  | -         | - |        |
| 998  | Cl_clus101021_Contig1 | ---NA---                                                        | 491 | 0  | -         | - |        |
| 999  | Cl_clus101022_Contig1 | ---NA---                                                        | 646 | 0  | -         | - |        |
| 1000 | Cl_clus101023_Contig1 | ---NA---                                                        | 329 | 0  | -         | - |        |
| 1001 | Cl_clus101025_Contig1 | ---NA---                                                        | 604 | 0  | -         | - |        |
| 1002 | Cl_clus101027_Contig1 | ---NA---                                                        | 464 | 0  | -         | - |        |
| 1003 | Cl_clus101028_Contig1 | ---NA---                                                        | 561 | 0  | -         | - |        |
| 1004 | Cl_clus101031_Contig1 | rhipicephalus sanguineus calreticulin complete cds              | 878 | 11 | 1.60E-158 |   | 75.45% |
| 1005 | Cl_clus101029_Contig1 | ---NA---                                                        | 296 | 0  | -         | - |        |
| 1006 | Cl_clus101024_Contig1 | ---NA---                                                        | 220 | 0  | -         | - |        |
| 1007 | Cl_clus101030_Contig1 | ---NA---                                                        | 216 | 0  | -         | - |        |
| 1008 | Cl_clus101026_Contig1 | ---NA---                                                        | 387 | 0  | -         | - |        |
| 1009 | Cl_clus101032_Contig1 | ---NA---                                                        | 385 | 0  | -         | - |        |
| 1010 | Cl_clus101033_Contig1 | ---NA---                                                        | 867 | 0  | -         | - |        |
| 1011 | Cl_clus101034_Contig1 | nematostella vectensis protein partial mrna                     | 520 | 1  | 9.30E-26  |   | 82.00% |
| 1012 | Cl_clus101035_Contig1 | ---NA---                                                        | 671 | 0  | -         | - |        |
| 1013 | Cl_clus101036_Contig1 | ---NA---                                                        | 606 | 0  | -         | - |        |
| 1014 | Cl_clus101038_Contig1 | ---NA---                                                        | 350 | 0  | -         | - |        |
| 1015 | Cl_clus101039_Contig1 | ---NA---                                                        | 533 | 0  | -         | - |        |
| 1016 | Cl_clus101040_Contig1 | biphyllus lunatus mrna for ribosomal protein l37e (rpl37e gene) | 460 | 1  | 1.10E-30  |   | 73.00% |
| 1017 | Cl_clus101037_Contig1 | ---NA---                                                        | 331 | 0  | -         | - |        |
| 1018 | Cl_clus101041_Contig1 | ---NA---                                                        | 434 | 0  | -         | - |        |
| 1019 | Cl_clus101042_Contig1 | ---NA---                                                        | 343 | 0  | -         | - |        |
| 1020 | Cl_clus101043_Contig1 | ---NA---                                                        | 691 | 0  | -         | - |        |
| 1021 | Cl_clus101044_Contig1 | ---NA---                                                        | 362 | 0  | -         | - |        |
| 1022 | Cl_clus101045_Contig1 | ---NA---                                                        | 245 | 0  | -         | - |        |
| 1023 | Cl_clus101046_Contig1 | ---NA---                                                        | 548 | 0  | -         | - |        |
| 1024 | Cl_clus101047_Contig1 | nematostella vectensis protein partial mrna                     | 449 | 2  | 5.00E-22  |   | 77.50% |

|      |                       |          |     |   |   |   |  |
|------|-----------------------|----------|-----|---|---|---|--|
| 1025 | Cl_clus101048_Contig1 | ---NA--- | 695 | 0 | - | - |  |
| 1026 | Cl_clus101049_Contig1 | ---NA--- | 340 | 0 | - | - |  |
| 1027 | Cl_clus101050_Contig1 | ---NA--- | 208 | 0 | - | - |  |
| 1028 | Cl_clus101051_Contig1 | ---NA--- | 504 | 0 | - | - |  |
| 1029 | Cl_clus101052_Contig1 | ---NA--- | 233 | 0 | - | - |  |
| 1030 | Cl_clus101053_Contig1 | ---NA--- | 439 | 0 | - | - |  |
| 1031 | Cl_clus101054_Contig1 | ---NA--- | 422 | 0 | - | - |  |
| 1032 | Cl_clus101055_Contig1 | ---NA--- | 324 | 0 | - | - |  |
| 1033 | Cl_clus101056_Contig1 | ---NA--- | 328 | 0 | - | - |  |
| 1034 | Cl_clus101057_Contig1 | ---NA--- | 366 | 0 | - | - |  |
| 1035 | Cl_clus101058_Contig1 | ---NA--- | 286 | 0 | - | - |  |
| 1036 | Cl_clus101059_Contig1 | ---NA--- | 204 | 0 | - | - |  |
| 1037 | Cl_clus101060_Contig1 | ---NA--- | 442 | 0 | - | - |  |
| 1038 | Cl_clus101061_Contig1 | ---NA--- | 283 | 0 | - | - |  |
| 1039 | Cl_clus101062_Contig1 | ---NA--- | 368 | 0 | - | - |  |
| 1040 | Cl_clus101063_Contig1 | ---NA--- | 520 | 0 | - | - |  |
| 1041 | Cl_clus101064_Contig1 | ---NA--- | 558 | 0 | - | - |  |
| 1042 | Cl_clus101065_Contig1 | ---NA--- | 409 | 0 | - | - |  |
| 1043 | Cl_clus101066_Contig1 | ---NA--- | 426 | 0 | - | - |  |
| 1044 | Cl_clus101067_Contig1 | ---NA--- | 464 | 0 | - | - |  |
| 1045 | Cl_clus101068_Contig1 | ---NA--- | 253 | 0 | - | - |  |
| 1046 | Cl_clus101069_Contig1 | ---NA--- | 290 | 0 | - | - |  |
| 1047 | Cl_clus101070_Contig1 | ---NA--- | 475 | 0 | - | - |  |
| 1048 | Cl_clus101071_Contig1 | ---NA--- | 356 | 0 | - | - |  |
| 1049 | Cl_clus101072_Contig1 | ---NA--- | 471 | 0 | - | - |  |
| 1050 | Cl_clus101073_Contig1 | ---NA--- | 240 | 0 | - | - |  |
| 1051 | Cl_clus101074_Contig1 | ---NA--- | 523 | 0 | - | - |  |
| 1052 | Cl_clus101075_Contig1 | ---NA--- | 777 | 0 | - | - |  |
| 1053 | Cl_clus101076_Contig1 | ---NA--- | 714 | 0 | - | - |  |
| 1054 | Cl_clus101077_Contig1 | ---NA--- | 272 | 0 | - | - |  |

|      |                       |                                                                                  |      |    |          |   |        |
|------|-----------------------|----------------------------------------------------------------------------------|------|----|----------|---|--------|
| 1055 | Cl_clus101078_Contig1 | ---NA---                                                                         | 510  | 0  | -        | - |        |
| 1056 | Cl_clus101079_Contig1 | mesocricetus auratus partial mrna for dihydroliipoamide dehydrogenase (dld gene) | 407  | 3  | 7.70E-51 |   | 70.67% |
| 1057 | Cl_clus101080_Contig1 | ---NA---                                                                         | 311  | 0  | -        | - |        |
| 1058 | Cl_clus101081_Contig1 | ---NA---                                                                         | 209  | 0  | -        | - |        |
| 1059 | Cl_clus101082_Contig1 | chrysochromulina nies-1333 alpha tubulin partial cds                             | 262  | 20 | 2.90E-85 |   | 86.00% |
| 1060 | Cl_clus101083_Contig1 | ---NA---                                                                         | 213  | 0  | -        | - |        |
| 1061 | Cl_clus101084_Contig1 | ---NA---                                                                         | 345  | 0  | -        | - |        |
| 1062 | Cl_clus101085_Contig1 | ---NA---                                                                         | 209  | 0  | -        | - |        |
| 1063 | Cl_clus101086_Contig1 | ---NA---                                                                         | 391  | 0  | -        | - |        |
| 1064 | Cl_clus101087_Contig1 | ---NA---                                                                         | 281  | 0  | -        | - |        |
| 1065 | Cl_clus101088_Contig1 | ---NA---                                                                         | 363  | 0  | -        | - |        |
| 1066 | Cl_clus101089_Contig1 | ---NA---                                                                         | 385  | 0  | -        | - |        |
| 1067 | Cl_clus101090_Contig1 | ---NA---                                                                         | 392  | 0  | -        | - |        |
| 1068 | Cl_clus101091_Contig1 | ---NA---                                                                         | 321  | 0  | -        | - |        |
| 1069 | Cl_clus101092_Contig1 | drosophila melanogaster malic enzyme b (men-b) transcript variant mrna           | 745  | 20 | 6.60E-55 |   | 70.60% |
| 1070 | Cl_clus101093_Contig1 | ---NA---                                                                         | 280  | 0  | -        | - |        |
| 1071 | Cl_clus101094_Contig1 | ---NA---                                                                         | 410  | 0  | -        | - |        |
| 1072 | Cl_clus101095_Contig1 | barley mrna for aspartic proteinase                                              | 609  | 1  | 5.40E-17 |   | 77.00% |
| 1073 | Cl_clus101097_Contig1 | ---NA---                                                                         | 242  | 0  | -        | - |        |
| 1074 | Cl_clus101098_Contig1 | ---NA---                                                                         | 471  | 0  | -        | - |        |
| 1075 | Cl_clus101099_Contig1 | ---NA---                                                                         | 332  | 0  | -        | - |        |
| 1076 | Cl_clus101100_Contig1 | ---NA---                                                                         | 378  | 0  | -        | - |        |
| 1077 | Cl_clus101101_Contig1 | ---NA---                                                                         | 437  | 0  | -        | - |        |
| 1078 | Cl_clus101096_Contig1 | ---NA---                                                                         | 399  | 0  | -        | - |        |
| 1079 | Cl_clus101102_Contig1 | ---NA---                                                                         | 662  | 0  | -        | - |        |
| 1080 | Cl_clus101103_Contig1 | ---NA---                                                                         | 1108 | 0  | -        | - |        |
| 1081 | Cl_clus101104_Contig1 | ---NA---                                                                         | 356  | 0  | -        | - |        |
| 1082 | Cl_clus101105_Contig1 | ---NA---                                                                         | 615  | 0  | -        | - |        |

|      |                       |                                                                                         |     |    |           |        |  |
|------|-----------------------|-----------------------------------------------------------------------------------------|-----|----|-----------|--------|--|
| 1083 | Cl_clus101106_Contig1 | ---NA---                                                                                | 554 | 0  | -         | -      |  |
| 1084 | Cl_clus101107_Contig1 | ---NA---                                                                                | 499 | 0  | -         | -      |  |
| 1085 | Cl_clus101109_Contig1 | riptortus pedestris mrna for splicing factor u2af large complete sequence id: rped-1473 | 592 | 3  | 1.00E-114 | 75.33% |  |
| 1086 | Cl_clus101110_Contig1 | ---NA---                                                                                | 325 | 0  | -         | -      |  |
| 1087 | Cl_clus101108_Contig1 | anopheles gambiae pest agap003851-pa complete cds                                       | 202 | 16 | 1.60E-36  | 79.13% |  |
| 1088 | Cl_clus101111_Contig1 | ---NA---                                                                                | 458 | 0  | -         | -      |  |
| 1089 | Cl_clus101112_Contig1 | ---NA---                                                                                | 484 | 0  | -         | -      |  |
| 1090 | Cl_clus101113_Contig1 | ---NA---                                                                                | 420 | 0  | -         | -      |  |
| 1091 | Cl_clus101114_Contig1 | locusta migratoria hexokinase complete cds                                              | 283 | 1  | 1.90E-37  | 76.00% |  |
| 1092 | Cl_clus101115_Contig1 | ---NA---                                                                                | 310 | 0  | -         | -      |  |
| 1093 | Cl_clus101116_Contig1 | ---NA---                                                                                | 283 | 0  | -         | -      |  |
| 1094 | Cl_clus101117_Contig1 | ---NA---                                                                                | 539 | 0  | -         | -      |  |
| 1095 | Cl_clus101118_Contig1 | ---NA---                                                                                | 367 | 0  | -         | -      |  |
| 1096 | Cl_clus101119_Contig1 | ---NA---                                                                                | 412 | 0  | -         | -      |  |
| 1097 | Cl_clus101121_Contig1 | ---NA---                                                                                | 559 | 0  | -         | -      |  |
| 1098 | Cl_clus101122_Contig1 | echinops telfairi valosin containing protein mrna                                       | 210 | 2  | 1.00E-32  | 77.00% |  |
| 1099 | Cl_clus101123_Contig1 | ---NA---                                                                                | 576 | 0  | -         | -      |  |
| 1100 | Cl_clus101124_Contig1 | ---NA---                                                                                | 326 | 0  | -         | -      |  |
| 1101 | Cl_clus101125_Contig1 | ---NA---                                                                                | 546 | 0  | -         | -      |  |
| 1102 | Cl_clus101126_Contig1 | ---NA---                                                                                | 404 | 0  | -         | -      |  |
| 1103 | Cl_clus101127_Contig1 | ---NA---                                                                                | 570 | 0  | -         | -      |  |
| 1104 | Cl_clus101120_Contig1 | ---NA---                                                                                | 416 | 0  | -         | -      |  |
| 1105 | Cl_clus101128_Contig1 | ---NA---                                                                                | 487 | 0  | -         | -      |  |
| 1106 | Cl_clus101129_Contig1 | ---NA---                                                                                | 229 | 0  | -         | -      |  |
| 1107 | Cl_clus101130_Contig1 | ---NA---                                                                                | 271 | 0  | -         | -      |  |
| 1108 | Cl_clus101131_Contig1 | ---NA---                                                                                | 306 | 0  | -         | -      |  |
| 1109 | Cl_clus101133_Contig1 | ---NA---                                                                                | 429 | 0  | -         | -      |  |
| 1110 | Cl_clus101134_Contig1 | ---NA---                                                                                | 211 | 0  | -         | -      |  |
| 1111 | Cl_clus101135_Contig1 | ficedula albicollis ezrin transcript variant mrna                                       | 434 | 9  | 1.70E-97  | 75.78% |  |
| 1112 | Cl_clus101136_Contig1 | ---NA---                                                                                | 267 | 0  | -         | -      |  |
| 1113 | Cl_clus101137_Contig1 | ---NA---                                                                                | 508 | 0  | -         | -      |  |
| 1114 | Cl_clus101132_Contig1 | ---NA---                                                                                | 632 | 0  | -         | -      |  |
| 1115 | Cl_clus101138_Contig1 | ---NA---                                                                                | 418 | 0  | -         | -      |  |
| 1116 | Cl_clus101139_Contig1 | ---NA---                                                                                | 566 | 0  | -         | -      |  |
| 1117 | Cl_clus101140_Contig1 | ---NA---                                                                                | 288 | 0  | -         | -      |  |
| 1118 | Cl_clus101141_Contig1 | ---NA---                                                                                | 300 | 0  | -         | -      |  |
| 1119 | Cl_clus101142_Contig1 | ---NA---                                                                                | 257 | 0  | -         | -      |  |
| 1120 | Cl_clus101143_Contig1 | ---NA---                                                                                | 527 | 0  | -         | -      |  |
| 1121 | Cl_clus101145_Contig1 | ---NA---                                                                                | 394 | 0  | -         | -      |  |
| 1122 | Cl_clus101146_Contig1 | ---NA---                                                                                | 343 | 0  | -         | -      |  |
| 1123 | Cl_clus101144_Contig1 | ---NA---                                                                                | 515 | 0  | -         | -      |  |
| 1124 | Cl_clus101148_Contig1 | ---NA---                                                                                | 353 | 0  | -         | -      |  |
| 1125 | Cl_clus101149_Contig1 | ---NA---                                                                                | 417 | 0  | -         | -      |  |
| 1126 | Cl_clus101150_Contig1 | ---NA---                                                                                | 453 | 0  | -         | -      |  |
| 1127 | Cl_clus101151_Contig1 | ---NA---                                                                                | 251 | 0  | -         | -      |  |
| 1128 | Cl_clus101152_Contig1 | ---NA---                                                                                | 226 | 0  | -         | -      |  |
| 1129 | Cl_clus101153_Contig1 | ---NA---                                                                                | 679 | 0  | -         | -      |  |
| 1130 | Cl_clus101154_Contig1 | gryllus bimaculatus gbcontig30018                                                       | 364 | 1  | 3.80E-54  | 88.00% |  |
| 1131 | Cl_clus101155_Contig1 | ---NA---                                                                                | 332 | 0  | -         | -      |  |
| 1132 | Cl_clus101156_Contig1 | ---NA---                                                                                | 479 | 0  | -         | -      |  |
| 1133 | Cl_clus101158_Contig1 | ---NA---                                                                                | 483 | 0  | -         | -      |  |
| 1134 | Cl_clus101159_Contig1 | ---NA---                                                                                | 225 | 0  | -         | -      |  |
| 1135 | Cl_clus101160_Contig1 | ---NA---                                                                                | 580 | 0  | -         | -      |  |
| 1136 | Cl_clus101157_Contig1 | ---NA---                                                                                | 439 | 0  | -         | -      |  |
| 1137 | Cl_clus101161_Contig1 | ---NA---                                                                                | 564 | 0  | -         | -      |  |
| 1138 | Cl_clus101162_Contig1 | ---NA---                                                                                | 277 | 0  | -         | -      |  |
| 1139 | Cl_clus101163_Contig1 | ---NA---                                                                                | 436 | 0  | -         | -      |  |
| 1140 | Cl_clus101164_Contig1 | ---NA---                                                                                | 322 | 0  | -         | -      |  |
| 1141 | Cl_clus101165_Contig1 | ---NA---                                                                                | 892 | 0  | -         | -      |  |

|      |                       |                                                                                   |     |     |           |        |
|------|-----------------------|-----------------------------------------------------------------------------------|-----|-----|-----------|--------|
| 1142 | Cl_clus101166_Contig1 | drosophila melanogaster cg2010 transcript variant mrna                            | 292 | 20  | 4.30E-90  | 83.40% |
| 1143 | Cl_clus101167_Contig1 | ---NA---                                                                          | 274 | 0 - | -         |        |
| 1144 | Cl_clus101168_Contig1 | ---NA---                                                                          | 270 | 0 - | -         |        |
| 1145 | Cl_clus101169_Contig1 | ---NA---                                                                          | 483 | 0 - | -         |        |
| 1146 | Cl_clus101170_Contig1 | ---NA---                                                                          | 276 | 0 - | -         |        |
| 1147 | Cl_clus101171_Contig1 | ---NA---                                                                          | 268 | 0 - | -         |        |
| 1148 | Cl_clus101172_Contig1 | ---NA---                                                                          | 317 | 0 - | -         |        |
| 1149 | Cl_clus101173_Contig1 | ---NA---                                                                          | 406 | 0 - | -         |        |
| 1150 | Cl_clus101174_Contig1 | ---NA---                                                                          | 419 | 0 - | -         |        |
| 1151 | Cl_clus101175_Contig1 | ---NA---                                                                          | 546 | 0 - | -         |        |
| 1152 | Cl_clus101176_Contig1 | ---NA---                                                                          | 229 | 0 - | -         |        |
| 1153 | Cl_clus101177_Contig1 | ---NA---                                                                          | 224 | 0 - | -         |        |
| 1154 | Cl_clus101178_Contig1 | ---NA---                                                                          | 323 | 0 - | -         |        |
| 1155 | Cl_clus101179_Contig1 | gallus gallus dead (asp-glu-ala-asp) box polypeptide 43 transcript variant mrna   | 268 | 4   | 4.80E-13  | 91.00% |
| 1156 | Cl_clus101180_Contig1 | ---NA---                                                                          | 436 | 0 - | -         |        |
| 1157 | Cl_clus101182_Contig1 | ---NA---                                                                          | 259 | 0 - | -         |        |
| 1158 | Cl_clus101183_Contig1 | ---NA---                                                                          | 250 | 0 - | -         |        |
| 1159 | Cl_clus101185_Contig1 | ---NA---                                                                          | 621 | 0 - | -         |        |
| 1160 | Cl_clus101186_Contig1 | ---NA---                                                                          | 360 | 0 - | -         |        |
| 1161 | Cl_clus101187_Contig1 | ---NA---                                                                          | 355 | 0 - | -         |        |
| 1162 | Cl_clus101188_Contig1 | ---NA---                                                                          | 336 | 0 - | -         |        |
| 1163 | Cl_clus101189_Contig1 | ---NA---                                                                          | 466 | 0 - | -         |        |
| 1164 | Cl_clus101190_Contig1 | ---NA---                                                                          | 369 | 0 - | -         |        |
| 1165 | Cl_clus101192_Contig1 | ---NA---                                                                          | 803 | 0 - | -         |        |
| 1166 | Cl_clus101193_Contig1 | ---NA---                                                                          | 791 | 0 - | -         |        |
| 1167 | Cl_clus101194_Contig1 | ---NA---                                                                          | 270 | 0 - | -         |        |
| 1168 | Cl_clus101195_Contig1 | ---NA---                                                                          | 257 | 0 - | -         |        |
| 1169 | Cl_clus101196_Contig1 | ---NA---                                                                          | 237 | 0 - | -         |        |
| 1170 | Cl_clus101197_Contig1 | ---NA---                                                                          | 328 | 0 - | -         |        |
| 1171 | Cl_clus101191_Contig1 | megachile rotundata ryanodine receptor 44f-like mrna                              | 428 | 2   | 8.10E-89  | 75.50% |
| 1172 | Cl_clus101198_Contig1 | ---NA---                                                                          | 703 | 0 - | -         |        |
| 1173 | Cl_clus101199_Contig1 | ---NA---                                                                          | 325 | 0 - | -         |        |
| 1174 | Cl_clus101200_Contig1 | ---NA---                                                                          | 377 | 0 - | -         |        |
| 1175 | Cl_clus101201_Contig1 | drosophila melanogaster ryanodine receptor 44f (rya-r44f) transcript variant mrna | 627 | 18  | 1.00E-108 | 78.78% |
| 1176 | Cl_clus101202_Contig1 | ---NA---                                                                          | 336 | 0 - | -         |        |
| 1177 | Cl_clus101204_Contig1 | ---NA---                                                                          | 905 | 0 - | -         |        |
| 1178 | Cl_clus101203_Contig1 | ---NA---                                                                          | 343 | 0 - | -         |        |
| 1179 | Cl_clus101207_Contig1 | ---NA---                                                                          | 325 | 0 - | -         |        |
| 1180 | Cl_clus101206_Contig1 | ---NA---                                                                          | 271 | 0 - | -         |        |
| 1181 | Cl_clus101208_Contig1 | ---NA---                                                                          | 346 | 0 - | -         |        |
| 1182 | Cl_clus101210_Contig1 | ---NA---                                                                          | 224 | 0 - | -         |        |
| 1183 | Cl_clus101184_Contig1 | ---NA---                                                                          | 466 | 0 - | -         |        |
| 1184 | Cl_clus101212_Contig1 | barentsia elongata ribosomal protein s13 complete cds                             | 526 | 1   | 1.40E-80  | 74.00% |
| 1185 | Cl_clus101213_Contig1 | ---NA---                                                                          | 305 | 0 - | -         |        |
| 1186 | Cl_clus101214_Contig1 | ---NA---                                                                          | 358 | 0 - | -         |        |
| 1187 | Cl_clus101215_Contig1 | ---NA---                                                                          | 421 | 0 - | -         |        |
| 1188 | Cl_clus101216_Contig1 | ---NA---                                                                          | 289 | 0 - | -         |        |
| 1189 | Cl_clus101218_Contig1 | ---NA---                                                                          | 231 | 0 - | -         |        |
| 1190 | Cl_clus101219_Contig1 | nasonia vitripennis rna-binding protein lark-like mrna                            | 286 | 1   | 4.90E-64  | 81.00% |
| 1191 | Cl_clus101220_Contig1 | ---NA---                                                                          | 324 | 0 - | -         |        |
| 1192 | Cl_clus101221_Contig1 | drosophila melanogaster chd64 transcript variant mrna                             | 567 | 14  | 1.00E-82  | 72.93% |
| 1193 | Cl_clus101222_Contig1 | nematostella vectensis protein partial mrna                                       | 492 | 1   | 3.80E-43  | 75.00% |
| 1194 | Cl_clus101223_Contig1 | ---NA---                                                                          | 797 | 0 - | -         |        |
| 1195 | Cl_clus101224_Contig1 | ---NA---                                                                          | 421 | 0 - | -         |        |
| 1196 | Cl_clus101225_Contig1 | ---NA---                                                                          | 263 | 0 - | -         |        |
| 1197 | Cl_clus101227_Contig1 | ---NA---                                                                          | 350 | 0 - | -         |        |
| 1198 | Cl_clus101228_Contig1 | ---NA---                                                                          | 778 | 0 - | -         |        |
| 1199 | Cl_clus101229_Contig1 | ---NA---                                                                          | 353 | 0 - | -         |        |

|      |                       |                                                                                                                                                                                                   |     |    |          |   |        |
|------|-----------------------|---------------------------------------------------------------------------------------------------------------------------------------------------------------------------------------------------|-----|----|----------|---|--------|
| 1200 | Cl_clus101231_Contig1 | ---NA---                                                                                                                                                                                          | 457 | 0  | -        | - |        |
| 1201 | Cl_clus101226_Contig1 | ---NA---                                                                                                                                                                                          | 488 | 0  | -        | - |        |
| 1202 | Cl_clus101232_Contig1 | apostichopus japonicus catalase complete cds                                                                                                                                                      | 394 | 3  | 3.00E-81 |   | 75.00% |
| 1203 | Cl_clus101233_Contig1 | anopheles gambiae pest agap010750-pa complete cds                                                                                                                                                 | 508 | 2  | 1.40E-23 |   | 83.00% |
| 1204 | Cl_clus101234_Contig1 | ---NA---                                                                                                                                                                                          | 487 | 0  | -        | - |        |
| 1205 | Cl_clus101230_Contig1 | ---NA---                                                                                                                                                                                          | 825 | 0  | -        | - |        |
| 1206 | Cl_clus101235_Contig1 | ---NA---                                                                                                                                                                                          | 414 | 0  | -        | - |        |
| 1207 | Cl_clus101237_Contig1 | ---NA---                                                                                                                                                                                          | 332 | 0  | -        | - |        |
| 1208 | Cl_clus101238_Contig1 | single read from an extremity of a full-length cdna clone made from anopheles gambiae total adult 5-prime end of clone fk0aac35ac08 of strain 6-9 of anopheles gambiae (african malaria mosquito) | 633 | 20 | 2.20E-66 |   | 72.45% |
| 1209 | Cl_clus101239_Contig1 | ---NA---                                                                                                                                                                                          | 241 | 0  | -        | - |        |
| 1210 | Cl_clus101240_Contig1 | ---NA---                                                                                                                                                                                          | 398 | 0  | -        | - |        |
| 1211 | Cl_clus101241_Contig1 | ---NA---                                                                                                                                                                                          | 421 | 0  | -        | - |        |
| 1212 | Cl_clus101242_Contig1 | ---NA---                                                                                                                                                                                          | 518 | 0  | -        | - |        |
| 1213 | Cl_clus101246_Contig1 | ---NA---                                                                                                                                                                                          | 329 | 0  | -        | - |        |
| 1214 | Cl_clus101236_Contig1 | ---NA---                                                                                                                                                                                          | 373 | 0  | -        | - |        |
| 1215 | Cl_clus101243_Contig1 | ---NA---                                                                                                                                                                                          | 438 | 0  | -        | - |        |
| 1216 | Cl_clus101247_Contig1 | ---NA---                                                                                                                                                                                          | 399 | 0  | -        | - |        |
| 1217 | Cl_clus101244_Contig1 | ---NA---                                                                                                                                                                                          | 396 | 0  | -        | - |        |
| 1218 | Cl_clus101248_Contig1 | ---NA---                                                                                                                                                                                          | 556 | 0  | -        | - |        |
| 1219 | Cl_clus101245_Contig1 | ---NA---                                                                                                                                                                                          | 663 | 0  | -        | - |        |
| 1220 | Cl_clus101249_Contig1 | ---NA---                                                                                                                                                                                          | 460 | 0  | -        | - |        |
| 1221 | Cl_clus101252_Contig1 | ---NA---                                                                                                                                                                                          | 360 | 0  | -        | - |        |
| 1222 | Cl_clus101251_Contig1 | ---NA---                                                                                                                                                                                          | 319 | 0  | -        | - |        |
| 1223 | Cl_clus101254_Contig1 | ---NA---                                                                                                                                                                                          | 246 | 0  | -        | - |        |
| 1224 | Cl_clus101255_Contig1 | ---NA---                                                                                                                                                                                          | 523 | 0  | -        | - |        |
| 1225 | Cl_clus101256_Contig1 | ---NA---                                                                                                                                                                                          | 336 | 0  | -        | - |        |
| 1226 | Cl_clus101257_Contig1 | ---NA---                                                                                                                                                                                          | 819 | 0  | -        | - |        |
| 1227 | Cl_clus101258_Contig1 | ---NA---                                                                                                                                                                                          | 420 | 0  | -        | - |        |
| 1228 | Cl_clus101253_Contig1 | ---NA---                                                                                                                                                                                          | 317 | 0  | -        | - |        |
| 1229 | Cl_clus101259_Contig1 | ---NA---                                                                                                                                                                                          | 537 | 0  | -        | - |        |
| 1230 | Cl_clus101260_Contig1 | ---NA---                                                                                                                                                                                          | 618 | 0  | -        | - |        |
| 1231 | Cl_clus101261_Contig1 | ---NA---                                                                                                                                                                                          | 495 | 0  | -        | - |        |
| 1232 | Cl_clus101262_Contig1 | gadus morhua sec61 gamma subunit complete cds                                                                                                                                                     | 452 | 1  | 1.40E-35 |   | 77.00% |
| 1233 | Cl_clus101263_Contig1 | ---NA---                                                                                                                                                                                          | 312 | 0  | -        | - |        |
| 1234 | Cl_clus101264_Contig1 | ---NA---                                                                                                                                                                                          | 658 | 0  | -        | - |        |
| 1235 | Cl_clus101265_Contig1 | ---NA---                                                                                                                                                                                          | 554 | 0  | -        | - |        |
| 1236 | Cl_clus101267_Contig1 | ---NA---                                                                                                                                                                                          | 224 | 0  | -        | - |        |
| 1237 | Cl_clus101268_Contig1 | acyrthosiphon pisum eukaryotic translation initiation factor 3 subunit e-like mrna                                                                                                                | 327 | 2  | 4.30E-59 |   | 75.00% |
| 1238 | Cl_clus101269_Contig1 | ---NA---                                                                                                                                                                                          | 311 | 0  | -        | - |        |
| 1239 | Cl_clus101270_Contig1 | ---NA---                                                                                                                                                                                          | 268 | 0  | -        | - |        |
| 1240 | Cl_clus101271_Contig1 | ---NA---                                                                                                                                                                                          | 207 | 0  | -        | - |        |
| 1241 | Cl_clus101272_Contig1 | ---NA---                                                                                                                                                                                          | 312 | 0  | -        | - |        |
| 1242 | Cl_clus101275_Contig1 | ---NA---                                                                                                                                                                                          | 404 | 0  | -        | - |        |
| 1243 | Cl_clus101276_Contig1 | ---NA---                                                                                                                                                                                          | 285 | 0  | -        | - |        |
| 1244 | Cl_clus101277_Contig1 | ---NA---                                                                                                                                                                                          | 427 | 0  | -        | - |        |
| 1245 | Cl_clus101278_Contig1 | ---NA---                                                                                                                                                                                          | 551 | 0  | -        | - |        |
| 1246 | Cl_clus101279_Contig1 | ---NA---                                                                                                                                                                                          | 529 | 0  | -        | - |        |
| 1247 | Cl_clus101280_Contig1 | ---NA---                                                                                                                                                                                          | 294 | 0  | -        | - |        |
| 1248 | Cl_clus101273_Contig1 | ---NA---                                                                                                                                                                                          | 575 | 0  | -        | - |        |
| 1249 | Cl_clus101274_Contig1 | ---NA---                                                                                                                                                                                          | 577 | 0  | -        | - |        |
| 1250 | Cl_clus101266_Contig1 | ---NA---                                                                                                                                                                                          | 325 | 0  | -        | - |        |
| 1251 | Cl_clus101281_Contig1 | ---NA---                                                                                                                                                                                          | 365 | 0  | -        | - |        |
| 1252 | Cl_clus101282_Contig1 | ---NA---                                                                                                                                                                                          | 575 | 0  | -        | - |        |
| 1253 | Cl_clus101283_Contig1 | ---NA---                                                                                                                                                                                          | 345 | 0  | -        | - |        |
| 1254 | Cl_clus101284_Contig1 | ---NA---                                                                                                                                                                                          | 485 | 0  | -        | - |        |
| 1255 | Cl_clus101285_Contig1 | ---NA---                                                                                                                                                                                          | 337 | 0  | -        | - |        |
| 1256 | Cl_clus101286_Contig1 | ---NA---                                                                                                                                                                                          | 364 | 0  | -        | - |        |

|      |                       |                                                                      |      |    |           |        |  |
|------|-----------------------|----------------------------------------------------------------------|------|----|-----------|--------|--|
| 1257 | Cl_clus101287_Contig1 | ---NA---                                                             | 499  | 0  | -         | -      |  |
| 1258 | Cl_clus101288_Contig1 | ---NA---                                                             | 453  | 0  | -         | -      |  |
| 1259 | Cl_clus101289_Contig1 | drosophila melanogaster ribosomal protein s4 transcript variant mrna | 442  | 17 | 4.30E-105 | 78.00% |  |
| 1260 | Cl_clus101290_Contig1 | ---NA---                                                             | 520  | 0  | -         | -      |  |
| 1261 | Cl_clus101291_Contig1 | ---NA---                                                             | 478  | 0  | -         | -      |  |
| 1262 | Cl_clus101293_Contig1 | drosophila melanogaster knockdown transcript variant mrna            | 527  | 13 | 2.70E-64  | 75.15% |  |
| 1263 | Cl_clus101294_Contig1 | ---NA---                                                             | 299  | 0  | -         | -      |  |
| 1264 | Cl_clus101295_Contig1 | ---NA---                                                             | 509  | 0  | -         | -      |  |
| 1265 | Cl_clus101296_Contig1 | ---NA---                                                             | 447  | 0  | -         | -      |  |
| 1266 | Cl_clus101297_Contig1 | ---NA---                                                             | 497  | 0  | -         | -      |  |
| 1267 | Cl_clus101298_Contig1 | ---NA---                                                             | 363  | 0  | -         | -      |  |
| 1268 | Cl_clus101292_Contig1 | ---NA---                                                             | 547  | 0  | -         | -      |  |
| 1269 | Cl_clus101299_Contig1 | hyriopsis cumingii 37 kda laminin receptor complete cds              | 605  | 1  | 1.90E-73  | 74.00% |  |
| 1270 | Cl_clus101300_Contig1 | ---NA---                                                             | 429  | 0  | -         | -      |  |
| 1271 | Cl_clus101301_Contig1 | ---NA---                                                             | 394  | 0  | -         | -      |  |
| 1272 | Cl_clus101302_Contig1 | ---NA---                                                             | 629  | 0  | -         | -      |  |
| 1273 | Cl_clus101304_Contig1 | ---NA---                                                             | 409  | 0  | -         | -      |  |
| 1274 | Cl_clus101305_Contig1 | ---NA---                                                             | 362  | 0  | -         | -      |  |
| 1275 | Cl_clus101303_Contig1 | ---NA---                                                             | 324  | 0  | -         | -      |  |
| 1276 | Cl_clus101306_Contig1 | ---NA---                                                             | 274  | 0  | -         | -      |  |
| 1277 | Cl_clus101309_Contig1 | ---NA---                                                             | 471  | 0  | -         | -      |  |
| 1278 | Cl_clus101311_Contig1 | ---NA---                                                             | 427  | 0  | -         | -      |  |
| 1279 | Cl_clus101312_Contig1 | ---NA---                                                             | 2111 | 0  | -         | -      |  |
| 1280 | Cl_clus101307_Contig1 | plutella xylostella 40 protein complete cds                          | 538  | 20 | 9.70E-102 | 79.85% |  |
| 1281 | Cl_clus101310_Contig1 | ---NA---                                                             | 288  | 0  | -         | -      |  |
| 1282 | Cl_clus101313_Contig1 | ---NA---                                                             | 571  | 0  | -         | -      |  |
| 1283 | Cl_clus101314_Contig1 | ---NA---                                                             | 305  | 0  | -         | -      |  |
| 1284 | Cl_clus101308_Contig1 | nematostella vectensis protein partial mrna                          | 476  | 3  | 3.90E-68  | 74.00% |  |
| 1285 | Cl_clus101315_Contig1 | ---NA---                                                             | 682  | 0  | -         | -      |  |
| 1286 | Cl_clus101316_Contig1 | ---NA---                                                             | 291  | 0  | -         | -      |  |

|      |                       |          |     |   |   |   |  |
|------|-----------------------|----------|-----|---|---|---|--|
| 1287 | Cl_clus101317_Contig1 | ---NA--- | 268 | 0 | - | - |  |
| 1288 | Cl_clus101318_Contig1 | ---NA--- | 460 | 0 | - | - |  |
| 1289 | Cl_clus101319_Contig1 | ---NA--- | 272 | 0 | - | - |  |
| 1290 | Cl_clus101320_Contig1 | ---NA--- | 266 | 0 | - | - |  |
| 1291 | Cl_clus101321_Contig1 | ---NA--- | 363 | 0 | - | - |  |
| 1292 | Cl_clus101323_Contig1 | ---NA--- | 239 | 0 | - | - |  |
| 1293 | Cl_clus101325_Contig1 | ---NA--- | 656 | 0 | - | - |  |
| 1294 | Cl_clus101326_Contig1 | ---NA--- | 294 | 0 | - | - |  |
| 1295 | Cl_clus101322_Contig1 | ---NA--- | 784 | 0 | - | - |  |
| 1296 | Cl_clus101327_Contig1 | ---NA--- | 426 | 0 | - | - |  |
| 1297 | Cl_clus101329_Contig1 | ---NA--- | 288 | 0 | - | - |  |
| 1298 | Cl_clus101324_Contig1 | ---NA--- | 430 | 0 | - | - |  |
| 1299 | Cl_clus101330_Contig1 | ---NA--- | 432 | 0 | - | - |  |
| 1300 | Cl_clus101328_Contig1 | ---NA--- | 374 | 0 | - | - |  |
| 1301 | Cl_clus101331_Contig1 | ---NA--- | 331 | 0 | - | - |  |
| 1302 | Cl_clus101332_Contig1 | ---NA--- | 215 | 0 | - | - |  |
| 1303 | Cl_clus101333_Contig1 | ---NA--- | 382 | 0 | - | - |  |
| 1304 | Cl_clus101334_Contig1 | ---NA--- | 264 | 0 | - | - |  |
| 1305 | Cl_clus101335_Contig1 | ---NA--- | 325 | 0 | - | - |  |
| 1306 | Cl_clus101338_Contig1 | ---NA--- | 497 | 0 | - | - |  |
| 1307 | Cl_clus101339_Contig1 | ---NA--- | 368 | 0 | - | - |  |
| 1308 | Cl_clus101340_Contig1 | ---NA--- | 671 | 0 | - | - |  |
| 1309 | Cl_clus101337_Contig1 | ---NA--- | 307 | 0 | - | - |  |
| 1310 | Cl_clus101341_Contig1 | ---NA--- | 291 | 0 | - | - |  |
| 1311 | Cl_clus101342_Contig1 | ---NA--- | 484 | 0 | - | - |  |
| 1312 | Cl_clus101343_Contig1 | ---NA--- | 223 | 0 | - | - |  |
| 1313 | Cl_clus101344_Contig1 | ---NA--- | 320 | 0 | - | - |  |
| 1314 | Cl_clus101345_Contig1 | ---NA--- | 574 | 0 | - | - |  |
| 1315 | Cl_clus101346_Contig1 | ---NA--- | 329 | 0 | - | - |  |
| 1316 | Cl_clus101347_Contig1 | ---NA--- | 355 | 0 | - | - |  |

|      |                       |                                                                     |      |   |          |   |        |
|------|-----------------------|---------------------------------------------------------------------|------|---|----------|---|--------|
| 1317 | Cl_clus101348_Contig1 | ---NA---                                                            | 391  | 0 | -        | - |        |
| 1318 | Cl_clus101349_Contig1 | ---NA---                                                            | 540  | 0 | -        | - |        |
| 1319 | Cl_clus101350_Contig1 | ---NA---                                                            | 354  | 0 | -        | - |        |
| 1320 | Cl_clus101336_Contig1 | ixodes scapularis protein phosphatase 2a regulatory subunit mrna    | 482  | 1 | 2.00E-65 |   | 72.00% |
| 1321 | Cl_clus101352_Contig1 | ---NA---                                                            | 290  | 0 | -        | - |        |
| 1322 | Cl_clus101351_Contig1 | ciona intestinalis gamma-aminobutyric acid receptor-associated mrna | 1023 | 3 | 1.50E-20 |   | 82.33% |
| 1323 | Cl_clus101353_Contig1 | ---NA---                                                            | 599  | 0 | -        | - |        |
| 1324 | Cl_clus101354_Contig1 | ---NA---                                                            | 720  | 0 | -        | - |        |
| 1325 | Cl_clus101355_Contig1 | ---NA---                                                            | 312  | 0 | -        | - |        |
| 1326 | Cl_clus101357_Contig1 | ---NA---                                                            | 425  | 0 | -        | - |        |
| 1327 | Cl_clus101358_Contig1 | ---NA---                                                            | 921  | 0 | -        | - |        |
| 1328 | Cl_clus101356_Contig1 | ---NA---                                                            | 318  | 0 | -        | - |        |
| 1329 | Cl_clus101359_Contig1 | ---NA---                                                            | 428  | 0 | -        | - |        |
| 1330 | Cl_clus101360_Contig1 | ---NA---                                                            | 285  | 0 | -        | - |        |
| 1331 | Cl_clus101361_Contig1 | ---NA---                                                            | 349  | 0 | -        | - |        |
| 1332 | Cl_clus101362_Contig1 | ---NA---                                                            | 690  | 0 | -        | - |        |
| 1333 | Cl_clus101363_Contig1 | ---NA---                                                            | 205  | 0 | -        | - |        |
| 1334 | Cl_clus101364_Contig1 | ---NA---                                                            | 253  | 0 | -        | - |        |
| 1335 | Cl_clus101365_Contig1 | ---NA---                                                            | 242  | 0 | -        | - |        |
| 1336 | Cl_clus101367_Contig1 | ---NA---                                                            | 207  | 0 | -        | - |        |
| 1337 | Cl_clus101368_Contig1 | ---NA---                                                            | 281  | 0 | -        | - |        |
| 1338 | Cl_clus101366_Contig1 | ---NA---                                                            | 331  | 0 | -        | - |        |
| 1339 | Cl_clus101370_Contig1 | ---NA---                                                            | 366  | 0 | -        | - |        |
| 1340 | Cl_clus101369_Contig1 | ---NA---                                                            | 611  | 0 | -        | - |        |
| 1341 | Cl_clus101372_Contig1 | ---NA---                                                            | 289  | 0 | -        | - |        |
| 1342 | Cl_clus101373_Contig1 | ---NA---                                                            | 309  | 0 | -        | - |        |
| 1343 | Cl_clus101374_Contig1 | ---NA---                                                            | 481  | 0 | -        | - |        |
| 1344 | Cl_clus101375_Contig1 | ---NA---                                                            | 259  | 0 | -        | - |        |
| 1345 | Cl_clus101371_Contig1 | ---NA---                                                            | 370  | 0 | -        | - |        |
| 1346 | Cl_clus101376_Contig1 | ---NA---                                                            | 371  | 0 | -        | - |        |

|      |                       |                                                                                 |     |    |          |   |        |
|------|-----------------------|---------------------------------------------------------------------------------|-----|----|----------|---|--------|
| 1347 | Cl_clus101377_Contig1 | ---NA---                                                                        | 719 | 0  | -        | - |        |
| 1348 | Cl_clus101378_Contig1 | ixodes pacificus clone ip_7_60_92_99_clu 40s ribosomal protein s30 complete cds | 510 | 2  | 2.50E-39 |   | 82.00% |
| 1349 | Cl_clus101379_Contig1 | ---NA---                                                                        | 517 | 0  | -        | - |        |
| 1350 | Cl_clus101380_Contig1 | drosophila melanogaster gasp transcript variant mrna                            | 349 | 15 | 8.40E-75 |   | 78.20% |
| 1351 | Cl_clus101381_Contig1 | ---NA---                                                                        | 584 | 0  | -        | - |        |
| 1352 | Cl_clus101382_Contig1 | ---NA---                                                                        | 593 | 0  | -        | - |        |
| 1353 | Cl_clus101384_Contig1 | ---NA---                                                                        | 368 | 0  | -        | - |        |
| 1354 | Cl_clus101385_Contig1 | ---NA---                                                                        | 229 | 0  | -        | - |        |
| 1355 | Cl_clus101383_Contig1 | ---NA---                                                                        | 376 | 0  | -        | - |        |
| 1356 | Cl_clus101386_Contig1 | ---NA---                                                                        | 353 | 0  | -        | - |        |
| 1357 | Cl_clus101387_Contig1 | ---NA---                                                                        | 607 | 0  | -        | - |        |
| 1358 | Cl_clus101389_Contig1 | ---NA---                                                                        | 269 | 0  | -        | - |        |
| 1359 | Cl_clus101390_Contig1 | gryllus bimaculatus gbcontig29054                                               | 448 | 3  | 3.60E-68 |   | 77.67% |
| 1360 | Cl_clus101391_Contig1 | ---NA---                                                                        | 449 | 0  | -        | - |        |
| 1361 | Cl_clus101392_Contig1 | ---NA---                                                                        | 266 | 0  | -        | - |        |
| 1362 | Cl_clus101393_Contig1 | ---NA---                                                                        | 225 | 0  | -        | - |        |
| 1363 | Cl_clus101394_Contig1 | ---NA---                                                                        | 658 | 0  | -        | - |        |
| 1364 | Cl_clus101395_Contig1 | ---NA---                                                                        | 266 | 0  | -        | - |        |
| 1365 | Cl_clus101388_Contig1 | ---NA---                                                                        | 862 | 0  | -        | - |        |
| 1366 | Cl_clus101396_Contig1 | tribolium castaneum protein mrna                                                | 310 | 1  | 4.40E-65 |   | 78.00% |
| 1367 | Cl_clus101397_Contig1 | ---NA---                                                                        | 467 | 0  | -        | - |        |
| 1368 | Cl_clus101398_Contig1 | ---NA---                                                                        | 268 | 0  | -        | - |        |
| 1369 | Cl_clus101399_Contig1 | ---NA---                                                                        | 287 | 0  | -        | - |        |
| 1370 | Cl_clus101400_Contig1 | ---NA---                                                                        | 544 | 0  | -        | - |        |
| 1371 | Cl_clus101401_Contig1 | ---NA---                                                                        | 597 | 0  | -        | - |        |
| 1372 | Cl_clus101402_Contig1 | ---NA---                                                                        | 372 | 0  | -        | - |        |
| 1373 | Cl_clus101407_Contig1 | ---NA---                                                                        | 453 | 0  | -        | - |        |
| 1374 | Cl_clus101404_Contig1 | ---NA---                                                                        | 243 | 0  | -        | - |        |
| 1375 | Cl_clus101408_Contig1 | ---NA---                                                                        | 314 | 0  | -        | - |        |



|      |                       |                                                                    |     |    |          |   |        |
|------|-----------------------|--------------------------------------------------------------------|-----|----|----------|---|--------|
| 1376 | Cl_clus101409_Contig1 | ---NA---                                                           | 429 | 0  | -        | - |        |
| 1377 | Cl_clus101410_Contig1 | ---NA---                                                           | 617 | 0  | -        | - |        |
| 1378 | Cl_clus101411_Contig1 | ---NA---                                                           | 297 | 0  | -        | - |        |
| 1379 | Cl_clus101405_Contig1 | setaria italica iron-sulfur cluster assembly protein 1-like mrna   | 356 | 11 | 5.50E-33 |   | 73.00% |
| 1380 | Cl_clus101412_Contig1 | ---NA---                                                           | 623 | 0  | -        | - |        |
| 1381 | Cl_clus101403_Contig1 | ---NA---                                                           | 388 | 0  | -        | - |        |
| 1382 | Cl_clus101414_Contig1 | ---NA---                                                           | 432 | 0  | -        | - |        |
| 1383 | Cl_clus101415_Contig1 | ---NA---                                                           | 425 | 0  | -        | - |        |
| 1384 | Cl_clus101406_Contig1 | ---NA---                                                           | 603 | 0  | -        | - |        |
| 1385 | Cl_clus101416_Contig1 | ---NA---                                                           | 202 | 0  | -        | - |        |
| 1386 | Cl_clus101417_Contig1 | ---NA---                                                           | 436 | 0  | -        | - |        |
| 1387 | Cl_clus101418_Contig1 | ---NA---                                                           | 288 | 0  | -        | - |        |
| 1388 | Cl_clus101413_Contig1 | megachile rotundata ryanodine receptor 44f-like mrna               | 471 | 1  | 2.00E-84 |   | 75.00% |
| 1389 | Cl_clus101419_Contig1 | ---NA---                                                           | 428 | 0  | -        | - |        |
| 1390 | Cl_clus101420_Contig1 | ---NA---                                                           | 441 | 0  | -        | - |        |
| 1391 | Cl_clus101421_Contig1 | ---NA---                                                           | 290 | 0  | -        | - |        |
| 1392 | Cl_clus101423_Contig1 | ---NA---                                                           | 281 | 0  | -        | - |        |
| 1393 | Cl_clus101424_Contig1 | ---NA---                                                           | 551 | 0  | -        | - |        |
| 1394 | Cl_clus101425_Contig1 | ---NA---                                                           | 685 | 0  | -        | - |        |
| 1395 | Cl_clus101426_Contig1 | ---NA---                                                           | 780 | 0  | -        | - |        |
| 1396 | Cl_clus101422_Contig1 | ---NA---                                                           | 710 | 0  | -        | - |        |
| 1397 | Cl_clus101427_Contig1 | drosophila pseudoobscura pseudoobscura ga10697 (dpse\ga10697) mrna | 335 | 2  | 5.10E-52 |   | 83.00% |
| 1398 | Cl_clus101428_Contig1 | ---NA---                                                           | 323 | 0  | -        | - |        |
| 1399 | Cl_clus101429_Contig1 | ---NA---                                                           | 219 | 0  | -        | - |        |
| 1400 | Cl_clus101431_Contig1 | ---NA---                                                           | 225 | 0  | -        | - |        |
| 1401 | Cl_clus101432_Contig1 | ---NA---                                                           | 312 | 0  | -        | - |        |
| 1402 | Cl_clus101433_Contig1 | ---NA---                                                           | 421 | 0  | -        | - |        |
| 1403 | Cl_clus101430_Contig1 | ---NA---                                                           | 457 | 0  | -        | - |        |
| 1404 | Cl_clus101434_Contig1 | bos taurus peroxiredoxin 5 mrna                                    | 450 | 2  | 3.00E-12 |   | 78.00% |
| 1405 | Cl_clus101435_Contig1 | ---NA---                                                           | 259 | 0  | -        | - |        |
| 1406 | Cl_clus101437_Contig1 | ---NA---                                                           | 370 | 0  | -        | - |        |
| 1407 | Cl_clus101439_Contig1 | ---NA---                                                           | 345 | 0  | -        | - |        |
| 1408 | Cl_clus101440_Contig1 | ---NA---                                                           | 456 | 0  | -        | - |        |
| 1409 | Cl_clus101436_Contig1 | ---NA---                                                           | 537 | 0  | -        | - |        |
| 1410 | Cl_clus101438_Contig1 | ---NA---                                                           | 377 | 0  | -        | - |        |
| 1411 | Cl_clus101441_Contig1 | ---NA---                                                           | 424 | 0  | -        | - |        |
| 1412 | Cl_clus101442_Contig1 | ---NA---                                                           | 633 | 0  | -        | - |        |
| 1413 | Cl_clus101443_Contig1 | ---NA---                                                           | 267 | 0  | -        | - |        |
| 1414 | Cl_clus101444_Contig1 | ---NA---                                                           | 348 | 0  | -        | - |        |
| 1415 | Cl_clus101447_Contig1 | ---NA---                                                           | 615 | 0  | -        | - |        |
| 1416 | Cl_clus101448_Contig1 | ---NA---                                                           | 487 | 0  | -        | - |        |
| 1417 | Cl_clus101449_Contig1 | ---NA---                                                           | 380 | 0  | -        | - |        |
| 1418 | Cl_clus101450_Contig1 | ---NA---                                                           | 369 | 0  | -        | - |        |
| 1419 | Cl_clus101445_Contig1 | ---NA---                                                           | 361 | 0  | -        | - |        |
| 1420 | Cl_clus101451_Contig1 | ---NA---                                                           | 283 | 0  | -        | - |        |
| 1421 | Cl_clus101446_Contig1 | ---NA---                                                           | 453 | 0  | -        | - |        |
| 1422 | Cl_clus101453_Contig1 | ---NA---                                                           | 929 | 0  | -        | - |        |
| 1423 | Cl_clus101454_Contig1 | ---NA---                                                           | 416 | 0  | -        | - |        |
| 1424 | Cl_clus101455_Contig1 | ---NA---                                                           | 455 | 0  | -        | - |        |
| 1425 | Cl_clus101456_Contig1 | ---NA---                                                           | 288 | 0  | -        | - |        |
| 1426 | Cl_clus101460_Contig1 | ---NA---                                                           | 233 | 0  | -        | - |        |
| 1427 | Cl_clus101459_Contig1 | ---NA---                                                           | 294 | 0  | -        | - |        |
| 1428 | Cl_clus101461_Contig1 | ---NA---                                                           | 221 | 0  | -        | - |        |
| 1429 | Cl_clus101463_Contig1 | ---NA---                                                           | 537 | 0  | -        | - |        |
| 1430 | Cl_clus101462_Contig1 | ---NA---                                                           | 579 | 0  | -        | - |        |
| 1431 | Cl_clus101465_Contig1 | ---NA---                                                           | 348 | 0  | -        | - |        |
| 1432 | Cl_clus101464_Contig1 | ---NA---                                                           | 376 | 0  | -        | - |        |
| 1433 | Cl_clus101457_Contig1 | ---NA---                                                           | 561 | 0  | -        | - |        |
| 1434 | Cl_clus101458_Contig1 | platynereis dumerilii est ib0aaa41ab04em1                          | 445 | 8  | 8.50E-89 |   | 79.88% |

|      |                       |                                                                                              |     |     |          |        |  |
|------|-----------------------|----------------------------------------------------------------------------------------------|-----|-----|----------|--------|--|
| 1435 | Cl_clus101466_Contig1 | ---NA---                                                                                     | 356 | 0 - | -        |        |  |
| 1436 | Cl_clus101468_Contig1 | ---NA---                                                                                     | 339 | 0 - | -        |        |  |
| 1437 | Cl_clus101467_Contig1 | ---NA---                                                                                     | 441 | 0 - | -        |        |  |
| 1438 | Cl_clus101469_Contig1 | ---NA---                                                                                     | 307 | 0 - | -        |        |  |
| 1439 | Cl_clus101470_Contig1 | ---NA---                                                                                     | 520 | 0 - | -        |        |  |
| 1440 | Cl_clus101471_Contig1 | ---NA---                                                                                     | 461 | 0 - | -        |        |  |
| 1441 | Cl_clus101472_Contig1 | ---NA---                                                                                     | 223 | 0 - | -        |        |  |
| 1442 | Cl_clus101473_Contig1 | plutella xylostella ryanodine receptor complete cds                                          | 820 | 16  | 0.00E+00 | 80.94% |  |
| 1443 | Cl_clus101474_Contig1 | ---NA---                                                                                     | 272 | 0 - | -        |        |  |
| 1444 | Cl_clus101475_Contig1 | ---NA---                                                                                     | 554 | 0 - | -        |        |  |
| 1445 | Cl_clus101476_Contig1 | strongylocentrotus purpuratus nascent polypeptide-associated complex subunit alpha-like mrna | 557 | 1   | 5.60E-29 | 76.00% |  |
| 1446 | Cl_clus101477_Contig1 | ---NA---                                                                                     | 371 | 0 - | -        |        |  |
| 1447 | Cl_clus101478_Contig1 | ---NA---                                                                                     | 355 | 0 - | -        |        |  |
| 1448 | Cl_clus101479_Contig1 | ---NA---                                                                                     | 453 | 0 - | -        |        |  |
| 1449 | Cl_clus101481_Contig1 | ---NA---                                                                                     | 415 | 0 - | -        |        |  |
| 1450 | Cl_clus101483_Contig1 | ---NA---                                                                                     | 233 | 0 - | -        |        |  |
| 1451 | Cl_clus101484_Contig1 | ---NA---                                                                                     | 368 | 0 - | -        |        |  |
| 1452 | Cl_clus101480_Contig1 | ---NA---                                                                                     | 645 | 0 - | -        |        |  |
| 1453 | Cl_clus101486_Contig1 | ---NA---                                                                                     | 230 | 0 - | -        |        |  |
| 1454 | Cl_clus101487_Contig1 | ---NA---                                                                                     | 451 | 0 - | -        |        |  |
| 1455 | Cl_clus101482_Contig1 | ---NA---                                                                                     | 598 | 0 - | -        |        |  |
| 1456 | Cl_clus101485_Contig1 | ---NA---                                                                                     | 264 | 0 - | -        |        |  |
| 1457 | Cl_clus101488_Contig2 | nasonia vitripennis transmembrane protein 35-like mrna                                       | 646 | 1   | 4.10E-25 | 67.00% |  |
| 1458 | Cl_clus101489_Contig1 | ---NA---                                                                                     | 307 | 0 - | -        |        |  |
| 1459 | Cl_clus101490_Contig1 | ---NA---                                                                                     | 292 | 0 - | -        |        |  |
| 1460 | Cl_clus101491_Contig1 | ---NA---                                                                                     | 285 | 0 - | -        |        |  |
| 1461 | Cl_clus101492_Contig1 | ---NA---                                                                                     | 374 | 0 - | -        |        |  |
| 1462 | Cl_clus101493_Contig1 | ---NA---                                                                                     | 344 | 0 - | -        |        |  |
| 1463 | Cl_clus101494_Contig1 | ---NA---                                                                                     | 600 | 0 - | -        |        |  |
| 1464 | Cl_clus101495_Contig1 | ---NA---                                                                                     | 523 | 0 - | -        |        |  |
| 1465 | Cl_clus101496_Contig1 | ---NA---                                                                                     | 381 | 0 - | -        |        |  |
| 1466 | Cl_clus101497_Contig1 | ---NA---                                                                                     | 405 | 0 - | -        |        |  |
| 1467 | Cl_clus101498_Contig1 | ---NA---                                                                                     | 353 | 0 - | -        |        |  |
| 1468 | Cl_clus101499_Contig1 | ---NA---                                                                                     | 834 | 0 - | -        |        |  |
| 1469 | Cl_clus101500_Contig1 | ---NA---                                                                                     | 339 | 0 - | -        |        |  |
| 1470 | Cl_clus101501_Contig1 | ---NA---                                                                                     | 655 | 0 - | -        |        |  |
| 1471 | Cl_clus101502_Contig1 | maylandia zebra ras-related protein rab-1a-like transcript variant mrna                      | 753 | 7   | 1.00E-90 | 77.29% |  |
| 1472 | Cl_clus101504_Contig1 | ---NA---                                                                                     | 298 | 0 - | -        |        |  |
| 1473 | Cl_clus101505_Contig1 | ---NA---                                                                                     | 452 | 0 - | -        |        |  |
| 1474 | Cl_clus101506_Contig1 | ---NA---                                                                                     | 398 | 0 - | -        |        |  |
| 1475 | Cl_clus101507_Contig1 | ---NA---                                                                                     | 581 | 0 - | -        |        |  |
| 1476 | Cl_clus101508_Contig1 | ---NA---                                                                                     | 435 | 0 - | -        |        |  |
| 1477 | Cl_clus101509_Contig1 | anopheles gambiae pest agap005960-pa complete cds                                            | 318 | 3   | 9.30E-36 | 74.33% |  |
| 1478 | Cl_clus101503_Contig1 | ---NA---                                                                                     | 294 | 0 - | -        |        |  |
| 1479 | Cl_clus101510_Contig1 | ---NA---                                                                                     | 499 | 0 - | -        |        |  |
| 1480 | Cl_clus101511_Contig1 | ---NA---                                                                                     | 500 | 0 - | -        |        |  |
| 1481 | Cl_clus101512_Contig1 | ---NA---                                                                                     | 653 | 0 - | -        |        |  |
| 1482 | Cl_clus101513_Contig1 | ---NA---                                                                                     | 534 | 0 - | -        |        |  |
| 1483 | Cl_clus101514_Contig1 | ---NA---                                                                                     | 496 | 0 - | -        |        |  |
| 1484 | Cl_clus101515_Contig1 | ---NA---                                                                                     | 328 | 0 - | -        |        |  |
| 1485 | Cl_clus101516_Contig1 | ---NA---                                                                                     | 370 | 0 - | -        |        |  |
| 1486 | Cl_clus101517_Contig1 | ---NA---                                                                                     | 580 | 0 - | -        |        |  |
| 1487 | Cl_clus101518_Contig1 | rana catesbeiana clone rcat-evr-518-049 40s ribosomal protein s16 complete cds               | 373 | 4   | 7.50E-76 | 77.50% |  |
| 1488 | Cl_clus101519_Contig1 | ---NA---                                                                                     | 305 | 0 - | -        |        |  |
| 1489 | Cl_clus101520_Contig1 | ---NA---                                                                                     | 297 | 0 - | -        |        |  |
| 1490 | Cl_clus101521_Contig1 | ---NA---                                                                                     | 453 | 0 - | -        |        |  |
| 1491 | Cl_clus101522_Contig1 | ---NA---                                                                                     | 402 | 0 - | -        |        |  |
| 1492 | Cl_clus101523_Contig1 | ---NA---                                                                                     | 319 | 0 - | -        |        |  |

|      |                       |                                                                      |      |    |           |        |  |
|------|-----------------------|----------------------------------------------------------------------|------|----|-----------|--------|--|
| 1493 | Cl_clus101525_Contig1 | ---NA---                                                             | 355  | 0  | -         | -      |  |
| 1494 | Cl_clus101526_Contig1 | tetraodon nigroviridis full-length cdna                              | 1012 | 20 | 1.50E-159 | 74.15% |  |
| 1495 | Cl_clus101527_Contig1 | ---NA---                                                             | 608  | 0  | -         | -      |  |
| 1496 | Cl_clus101529_Contig1 | ---NA---                                                             | 231  | 0  | -         | -      |  |
| 1497 | Cl_clus101530_Contig1 | ---NA---                                                             | 363  | 0  | -         | -      |  |
| 1498 | Cl_clus101531_Contig1 | gryllus bimaculatus gbcontig28025                                    | 416  | 20 | 1.20E-149 | 78.05% |  |
| 1499 | Cl_clus101532_Contig1 | ---NA---                                                             | 495  | 0  | -         | -      |  |
| 1500 | Cl_clus101533_Contig1 | ---NA---                                                             | 782  | 0  | -         | -      |  |
| 1501 | Cl_clus101524_Contig1 | ---NA---                                                             | 556  | 0  | -         | -      |  |
| 1502 | Cl_clus101528_Contig1 | ---NA---                                                             | 240  | 0  | -         | -      |  |
| 1503 | Cl_clus101534_Contig1 | ---NA---                                                             | 201  | 0  | -         | -      |  |
| 1504 | Cl_clus101535_Contig1 | ---NA---                                                             | 393  | 0  | -         | -      |  |
| 1505 | Cl_clus101536_Contig1 | ---NA---                                                             | 339  | 0  | -         | -      |  |
| 1506 | Cl_clus101537_Contig1 | ---NA---                                                             | 314  | 0  | -         | -      |  |
| 1507 | Cl_clus101538_Contig1 | ---NA---                                                             | 537  | 0  | -         | -      |  |
| 1508 | Cl_clus101539_Contig1 | ---NA---                                                             | 728  | 0  | -         | -      |  |
| 1509 | Cl_clus101540_Contig1 | ---NA---                                                             | 517  | 0  | -         | -      |  |
| 1510 | Cl_clus101541_Contig1 | ---NA---                                                             | 495  | 0  | -         | -      |  |
| 1511 | Cl_clus101542_Contig1 | ---NA---                                                             | 337  | 0  | -         | -      |  |
| 1512 | Cl_clus101543_Contig1 | ---NA---                                                             | 363  | 0  | -         | -      |  |
| 1513 | Cl_clus101544_Contig1 | ---NA---                                                             | 662  | 0  | -         | -      |  |
| 1514 | Cl_clus101545_Contig1 | ---NA---                                                             | 872  | 0  | -         | -      |  |
| 1515 | Cl_clus101546_Contig1 | ---NA---                                                             | 322  | 0  | -         | -      |  |
| 1516 | Cl_clus101547_Contig1 | ---NA---                                                             | 275  | 0  | -         | -      |  |
| 1517 | Cl_clus101548_Contig1 | ---NA---                                                             | 639  | 0  | -         | -      |  |
| 1518 | Cl_clus101549_Contig1 | ---NA---                                                             | 244  | 0  | -         | -      |  |
| 1519 | Cl_clus101550_Contig1 | ---NA---                                                             | 403  | 0  | -         | -      |  |
| 1520 | Cl_clus101551_Contig1 | ---NA---                                                             | 457  | 0  | -         | -      |  |
| 1521 | Cl_clus101552_Contig1 | ---NA---                                                             | 362  | 0  | -         | -      |  |
| 1522 | Cl_clus101553_Contig1 | ---NA---                                                             | 456  | 0  | -         | -      |  |
| 1523 | Cl_clus101554_Contig1 | ---NA---                                                             | 238  | 0  | -         | -      |  |
| 1524 | Cl_clus101555_Contig1 | ---NA---                                                             | 283  | 0  | -         | -      |  |
| 1525 | Cl_clus101557_Contig1 | ---NA---                                                             | 411  | 0  | -         | -      |  |
| 1526 | Cl_clus101558_Contig1 | nasonia vitripennis elongation factor 2-like mrna                    | 508  | 6  | 4.10E-87  | 77.17% |  |
| 1527 | Cl_clus101559_Contig1 | ---NA---                                                             | 380  | 0  | -         | -      |  |
| 1528 | Cl_clus101561_Contig1 | arabidopsis thaliana at1g67090 complete cds                          | 470  | 20 | 0.00E+00  | 97.00% |  |
| 1529 | Cl_clus101562_Contig1 | ---NA---                                                             | 662  | 0  | -         | -      |  |
| 1530 | Cl_clus101563_Contig1 | ---NA---                                                             | 968  | 0  | -         | -      |  |
| 1531 | Cl_clus101564_Contig1 | ---NA---                                                             | 322  | 0  | -         | -      |  |
| 1532 | Cl_clus101556_Contig1 | sipylloidea sipylus mitochondrial partial genome                     | 231  | 20 | 5.60E-62  | 80.70% |  |
| 1533 | Cl_clus101560_Contig1 | arabidopsis thaliana at1g29930 f1n18_23 complete cds                 | 590  | 20 | 0.00E+00  | 93.30% |  |
| 1534 | Cl_clus101565_Contig1 | ---NA---                                                             | 419  | 0  | -         | -      |  |
| 1535 | Cl_clus101566_Contig1 | ---NA---                                                             | 359  | 0  | -         | -      |  |
| 1536 | Cl_clus101567_Contig1 | ---NA---                                                             | 513  | 0  | -         | -      |  |
| 1537 | Cl_clus101568_Contig1 | papilio polytes mrna for troponin complete sequence id: pp-0016      | 366  | 20 | 1.70E-39  | 84.70% |  |
| 1538 | Cl_clus101569_Contig1 | drosophila melanogaster myosin heavy chain transcript variant mrna   | 596  | 20 | 0.00E+00  | 80.25% |  |
| 1539 | Cl_clus101570_Contig1 | ---NA---                                                             | 285  | 0  | -         | -      |  |
| 1540 | Cl_clus101573_Contig2 | ---NA---                                                             | 293  | 0  | -         | -      |  |
| 1541 | Cl_clus101575_Contig1 | ---NA---                                                             | 439  | 0  | -         | -      |  |
| 1542 | Cl_clus101576_Contig1 | ---NA---                                                             | 314  | 0  | -         | -      |  |
| 1543 | Cl_clus101577_Contig1 | ---NA---                                                             | 247  | 0  | -         | -      |  |
| 1544 | Cl_clus101578_Contig1 | ---NA---                                                             | 333  | 0  | -         | -      |  |
| 1545 | Cl_clus101571_Contig1 | bombyx mori myosin light chain 2 complete cds                        | 990  | 20 | 4.30E-160 | 79.00% |  |
| 1546 | Cl_clus101572_Contig1 | ---NA---                                                             | 774  | 0  | -         | -      |  |
| 1547 | Cl_clus101579_Contig1 | ---NA---                                                             | 218  | 0  | -         | -      |  |
| 1548 | Cl_clus101580_Contig1 | ---NA---                                                             | 223  | 0  | -         | -      |  |
| 1549 | Cl_clus101581_Contig1 | ---NA---                                                             | 268  | 0  | -         | -      |  |
| 1550 | Cl_clus101582_Contig1 | ---NA---                                                             | 293  | 0  | -         | -      |  |
| 1551 | Cl_clus101583_Contig1 | ---NA---                                                             | 335  | 0  | -         | -      |  |
| 1552 | Cl_clus101585_Contig1 | salmo salar 6-phosphofructo-2-kinase fructose- -biphosphatase 2 mrna | 476  | 1  | 3.20E-12  | 80.00% |  |

|                            |                                                                   |     |     |          |        |
|----------------------------|-------------------------------------------------------------------|-----|-----|----------|--------|
| 1553 Cl_clus101586_Contig1 | ---NA---                                                          | 272 | 0 - | -        |        |
| 1554 Cl_clus101587_Contig1 | ---NA---                                                          | 357 | 0 - | -        |        |
| 1555 Cl_clus101584_Contig1 | ---NA---                                                          | 234 | 0 - | -        |        |
| 1556 Cl_clus101589_Contig1 | ---NA---                                                          | 350 | 0 - | -        |        |
| 1557 Cl_clus101590_Contig1 | ---NA---                                                          | 202 | 0 - | -        |        |
| 1558 Cl_clus101592_Contig1 | ---NA---                                                          | 325 | 0 - | -        |        |
| 1559 Cl_clus101593_Contig1 | ---NA---                                                          | 423 | 0 - | -        |        |
| 1560 Cl_clus101588_Contig1 | ---NA---                                                          | 261 | 0 - | -        |        |
| 1561 Cl_clus101594_Contig1 | ---NA---                                                          | 249 | 0 - | -        |        |
| 1562 Cl_clus101595_Contig1 | ---NA---                                                          | 250 | 0 - | -        |        |
| 1563 Cl_clus101596_Contig1 | ---NA---                                                          | 328 | 0 - | -        |        |
| 1564 Cl_clus101597_Contig1 | ---NA---                                                          | 297 | 0 - | -        |        |
| 1565 Cl_clus101598_Contig1 | ---NA---                                                          | 235 | 0 - | -        |        |
| 1566 Cl_clus101599_Contig1 | ---NA---                                                          | 310 | 0 - | -        |        |
| 1567 Cl_clus101600_Contig1 | ---NA---                                                          | 259 | 0 - | -        |        |
| 1568 Cl_clus101601_Contig1 | ---NA---                                                          | 308 | 0 - | -        |        |
| 1569 Cl_clus101602_Contig1 | ---NA---                                                          | 340 | 0 - | -        |        |
| 1570 Cl_clus101604_Contig1 | ---NA---                                                          | 322 | 0 - | -        |        |
| 1571 Cl_clus101608_Contig1 | ---NA---                                                          | 332 | 0 - | -        |        |
| 1572 Cl_clus101609_Contig1 | ---NA---                                                          | 287 | 0 - | -        |        |
| 1573 Cl_clus101605_Contig1 | ---NA---                                                          | 239 | 0 - | -        |        |
| 1574 Cl_clus101606_Contig1 | ---NA---                                                          | 353 | 0 - | -        |        |
| 1575 Cl_clus101610_Contig1 | ---NA---                                                          | 376 | 0 - | -        |        |
| 1576 Cl_clus101613_Contig1 | ---NA---                                                          | 212 | 0 - | -        |        |
| 1577 Cl_clus101614_Contig1 | ---NA---                                                          | 458 | 0 - | -        |        |
| 1578 Cl_clus101616_Contig1 | ---NA---                                                          | 514 | 0 - | -        |        |
| 1579 Cl_clus101618_Contig1 | ovis aries iron-sulfur cluster assembly 1 mitochondrial-like mrna | 598 | 14  | 2.60E-27 | 80.86% |
| 1580 Cl_clus101619_Contig1 | ---NA---                                                          | 281 | 0 - | -        |        |
| 1581 Cl_clus101620_Contig1 | ---NA---                                                          | 222 | 0 - | -        |        |
| 1582 Cl_clus101621_Contig1 | ---NA---                                                          | 391 | 0 - | -        |        |

|                            |          |     |     |   |  |
|----------------------------|----------|-----|-----|---|--|
| 1583 Cl_clus101623_Contig1 | ---NA--- | 355 | 0 - | - |  |
| 1584 Cl_clus101617_Contig1 | ---NA--- | 205 | 0 - | - |  |
| 1585 Cl_clus101615_Contig1 | ---NA--- | 235 | 0 - | - |  |
| 1586 Cl_clus101622_Contig1 | ---NA--- | 262 | 0 - | - |  |
| 1587 Cl_clus101624_Contig1 | ---NA--- | 626 | 0 - | - |  |
| 1588 Cl_clus101625_Contig1 | ---NA--- | 356 | 0 - | - |  |
| 1589 Cl_clus101626_Contig1 | ---NA--- | 416 | 0 - | - |  |
| 1590 Cl_clus101627_Contig1 | ---NA--- | 380 | 0 - | - |  |
| 1591 Cl_clus101629_Contig1 | ---NA--- | 234 | 0 - | - |  |
| 1592 Cl_clus101630_Contig1 | ---NA--- | 329 | 0 - | - |  |
| 1593 Cl_clus101631_Contig1 | ---NA--- | 344 | 0 - | - |  |
| 1594 Cl_clus101632_Contig1 | ---NA--- | 297 | 0 - | - |  |
| 1595 Cl_clus101634_Contig1 | ---NA--- | 347 | 0 - | - |  |
| 1596 Cl_clus101636_Contig1 | ---NA--- | 838 | 0 - | - |  |
| 1597 Cl_clus101633_Contig1 | ---NA--- | 424 | 0 - | - |  |
| 1598 Cl_clus101635_Contig1 | ---NA--- | 393 | 0 - | - |  |
| 1599 Cl_clus101639_Contig1 | ---NA--- | 204 | 0 - | - |  |
| 1600 Cl_clus101637_Contig1 | ---NA--- | 201 | 0 - | - |  |
| 1601 Cl_clus101638_Contig1 | ---NA--- | 277 | 0 - | - |  |
| 1602 Cl_clus101642_Contig1 | ---NA--- | 451 | 0 - | - |  |
| 1603 Cl_clus101643_Contig1 | ---NA--- | 365 | 0 - | - |  |
| 1604 Cl_clus101644_Contig1 | ---NA--- | 351 | 0 - | - |  |
| 1605 Cl_clus101645_Contig1 | ---NA--- | 244 | 0 - | - |  |
| 1606 Cl_clus101648_Contig1 | ---NA--- | 309 | 0 - | - |  |
| 1607 Cl_clus101649_Contig1 | ---NA--- | 229 | 0 - | - |  |
| 1608 Cl_clus101640_Contig1 | ---NA--- | 232 | 0 - | - |  |
| 1609 Cl_clus101650_Contig1 | ---NA--- | 341 | 0 - | - |  |
| 1610 Cl_clus101652_Contig1 | ---NA--- | 281 | 0 - | - |  |
| 1611 Cl_clus101653_Contig1 | ---NA--- | 305 | 0 - | - |  |
| 1612 Cl_clus101654_Contig1 | ---NA--- | 275 | 0 - | - |  |

|      |                       |                                                                    |     |   |           |   |        |
|------|-----------------------|--------------------------------------------------------------------|-----|---|-----------|---|--------|
| 1613 | Cl_clus101647_Contig1 | ---NA---                                                           | 263 | 0 | -         | - |        |
| 1614 | Cl_clus101655_Contig1 | ---NA---                                                           | 304 | 0 | -         | - |        |
| 1615 | Cl_clus101658_Contig1 | ---NA---                                                           | 359 | 0 | -         | - |        |
| 1616 | Cl_clus101660_Contig1 | ---NA---                                                           | 236 | 0 | -         | - |        |
| 1617 | Cl_clus101661_Contig1 | ---NA---                                                           | 224 | 0 | -         | - |        |
| 1618 | Cl_clus101657_Contig1 | ---NA---                                                           | 295 | 0 | -         | - |        |
| 1619 | Cl_clus101663_Contig1 | ---NA---                                                           | 266 | 0 | -         | - |        |
| 1620 | Cl_clus101664_Contig1 | ---NA---                                                           | 218 | 0 | -         | - |        |
| 1621 | Cl_clus101659_Contig1 | ---NA---                                                           | 319 | 0 | -         | - |        |
| 1622 | Cl_clus101666_Contig1 | culex quinquefasciatus ryanodine mrna                              | 471 | 4 | 3.10E-107 |   | 76.50% |
| 1623 | Cl_clus101667_Contig1 | ---NA---                                                           | 295 | 0 | -         | - |        |
| 1624 | Cl_clus101665_Contig1 | ---NA---                                                           | 369 | 0 | -         | - |        |
| 1625 | Cl_clus101668_Contig1 | ---NA---                                                           | 271 | 0 | -         | - |        |
| 1626 | Cl_clus101670_Contig1 | ---NA---                                                           | 243 | 0 | -         | - |        |
| 1627 | Cl_clus101671_Contig1 | ---NA---                                                           | 378 | 0 | -         | - |        |
| 1628 | Cl_clus101662_Contig1 | ---NA---                                                           | 313 | 0 | -         | - |        |
| 1629 | Cl_clus101673_Contig1 | ---NA---                                                           | 223 | 0 | -         | - |        |
| 1630 | Cl_clus101669_Contig1 | acyrthosiphon pisum chloride intracellular channel exc-4-like mrna | 288 | 1 | 2.20E-11  |   | 91.00% |
| 1631 | Cl_clus101674_Contig1 | ---NA---                                                           | 215 | 0 | -         | - |        |
| 1632 | Cl_clus101675_Contig1 | ---NA---                                                           | 203 | 0 | -         | - |        |
| 1633 | Cl_clus101676_Contig1 | ---NA---                                                           | 389 | 0 | -         | - |        |
| 1634 | Cl_clus101678_Contig1 | ---NA---                                                           | 226 | 0 | -         | - |        |
| 1635 | Cl_clus101677_Contig1 | ---NA---                                                           | 237 | 0 | -         | - |        |
| 1636 | Cl_clus101679_Contig1 | ---NA---                                                           | 257 | 0 | -         | - |        |
| 1637 | Cl_clus101680_Contig1 | ---NA---                                                           | 308 | 0 | -         | - |        |
| 1638 | Cl_clus101681_Contig1 | ---NA---                                                           | 393 | 0 | -         | - |        |
| 1639 | Cl_clus101682_Contig1 | ---NA---                                                           | 210 | 0 | -         | - |        |
| 1640 | Cl_clus101683_Contig1 | ---NA---                                                           | 273 | 0 | -         | - |        |
| 1641 | Cl_clus101684_Contig1 | ---NA---                                                           | 350 | 0 | -         | - |        |
| 1642 | Cl_clus101686_Contig1 | ---NA---                                                           | 231 | 0 | -         | - |        |

|      |                       |                                                                         |     |    |           |   |        |
|------|-----------------------|-------------------------------------------------------------------------|-----|----|-----------|---|--------|
| 1643 | Cl_clus101688_Contig1 | ---NA---                                                                | 258 | 0  | -         | - |        |
| 1644 | Cl_clus101689_Contig1 | ---NA---                                                                | 340 | 0  | -         | - |        |
| 1645 | Cl_clus101690_Contig1 | ---NA---                                                                | 246 | 0  | -         | - |        |
| 1646 | Cl_clus101692_Contig1 | ---NA---                                                                | 397 | 0  | -         | - |        |
| 1647 | Cl_clus101694_Contig1 | ---NA---                                                                | 533 | 0  | -         | - |        |
| 1648 | Cl_clus101696_Contig1 | ---NA---                                                                | 323 | 0  | -         | - |        |
| 1649 | Cl_clus101698_Contig1 | ---NA---                                                                | 438 | 0  | -         | - |        |
| 1650 | Cl_clus101699_Contig1 | ---NA---                                                                | 332 | 0  | -         | - |        |
| 1651 | Cl_clus101700_Contig1 | ---NA---                                                                | 231 | 0  | -         | - |        |
| 1652 | Cl_clus101701_Contig1 | ---NA---                                                                | 438 | 0  | -         | - |        |
| 1653 | Cl_clus101704_Contig1 | ---NA---                                                                | 234 | 0  | -         | - |        |
| 1654 | Cl_clus101705_Contig1 | ---NA---                                                                | 203 | 0  | -         | - |        |
| 1655 | Cl_clus101697_Contig1 | ---NA---                                                                | 336 | 0  | -         | - |        |
| 1656 | Cl_clus101706_Contig1 | ---NA---                                                                | 290 | 0  | -         | - |        |
| 1657 | Cl_clus101708_Contig1 | ---NA---                                                                | 345 | 0  | -         | - |        |
| 1658 | Cl_clus101710_Contig1 | ---NA---                                                                | 358 | 0  | -         | - |        |
| 1659 | Cl_clus101709_Contig1 | ---NA---                                                                | 203 | 0  | -         | - |        |
| 1660 | Cl_clus101711_Contig1 | ---NA---                                                                | 286 | 0  | -         | - |        |
| 1661 | Cl_clus101713_Contig1 | ---NA---                                                                | 301 | 0  | -         | - |        |
| 1662 | Cl_clus101712_Contig1 | ---NA---                                                                | 369 | 0  | -         | - |        |
| 1663 | Cl_clus101714_Contig1 | ---NA---                                                                | 209 | 0  | -         | - |        |
| 1664 | Cl_clus101717_Contig1 | ---NA---                                                                | 250 | 0  | -         | - |        |
| 1665 | Cl_clus101720_Contig1 | ---NA---                                                                | 266 | 0  | -         | - |        |
| 1666 | Cl_clus101721_Contig1 | ---NA---                                                                | 228 | 0  | -         | - |        |
| 1667 | Cl_clus101722_Contig1 | ---NA---                                                                | 495 | 0  | -         | - |        |
| 1668 | Cl_clus101723_Contig1 | ---NA---                                                                | 399 | 0  | -         | - |        |
| 1669 | Cl_clus101724_Contig1 | ---NA---                                                                | 254 | 0  | -         | - |        |
| 1670 | Cl_clus101726_Contig1 | ---NA---                                                                | 228 | 0  | -         | - |        |
| 1671 | Cl_clus101727_Contig1 | ficedula albicollis tubulin alpha-1c chain-like transcript variant mrna | 280 | 20 | 8.60E-118 |   | 92.10% |
| 1672 | Cl_clus101728_Contig1 | ---NA---                                                                | 203 | 0  | -         | - |        |

|      |                       |                                                                                   |     |    |           |        |  |
|------|-----------------------|-----------------------------------------------------------------------------------|-----|----|-----------|--------|--|
| 1673 | Cl_clus101730_Contig1 | ---NA---                                                                          | 383 | 0  | -         | -      |  |
| 1674 | Cl_clus101732_Contig1 | aedes aegypti protein disulfide isomerase partial mrna                            | 237 | 4  | 3.00E-21  | 75.00% |  |
| 1675 | Cl_clus101733_Contig1 | ---NA---                                                                          | 276 | 0  | -         | -      |  |
| 1676 | Cl_clus101734_Contig1 | octodon degus ca++ plasma membrane 4 transcript variant mrna                      | 397 | 20 | 7.50E-32  | 76.70% |  |
| 1677 | Cl_clus101736_Contig1 | ---NA---                                                                          | 302 | 0  | -         | -      |  |
| 1678 | Cl_clus101737_Contig1 | ---NA---                                                                          | 267 | 0  | -         | -      |  |
| 1679 | Cl_clus101740_Contig1 | ---NA---                                                                          | 411 | 0  | -         | -      |  |
| 1680 | Cl_clus101741_Contig1 | ---NA---                                                                          | 445 | 0  | -         | -      |  |
| 1681 | Cl_clus101739_Contig1 | ---NA---                                                                          | 263 | 0  | -         | -      |  |
| 1682 | Cl_clus101742_Contig1 | ---NA---                                                                          | 377 | 0  | -         | -      |  |
| 1683 | Cl_clus101743_Contig1 | ---NA---                                                                          | 496 | 0  | -         | -      |  |
| 1684 | Cl_clus101738_Contig1 | ---NA---                                                                          | 488 | 0  | -         | -      |  |
| 1685 | Cl_clus101744_Contig1 | ---NA---                                                                          | 589 | 0  | -         | -      |  |
| 1686 | Cl_clus101745_Contig1 | ---NA---                                                                          | 342 | 0  | -         | -      |  |
| 1687 | Cl_clus101746_Contig1 | drosophila melanogaster ryanodine receptor 44f (rya-r44f) transcript variant mrna | 539 | 18 | 8.50E-147 | 79.17% |  |
| 1688 | Cl_clus101747_Contig1 | ---NA---                                                                          | 430 | 0  | -         | -      |  |
| 1689 | Cl_clus101748_Contig1 | ---NA---                                                                          | 270 | 0  | -         | -      |  |
| 1690 | Cl_clus101749_Contig1 | ---NA---                                                                          | 291 | 0  | -         | -      |  |
| 1691 | Cl_clus101751_Contig1 | ---NA---                                                                          | 486 | 0  | -         | -      |  |
| 1692 | Cl_clus101752_Contig1 | ---NA---                                                                          | 313 | 0  | -         | -      |  |
| 1693 | Cl_clus101754_Contig1 | ---NA---                                                                          | 305 | 0  | -         | -      |  |
| 1694 | Cl_clus101755_Contig1 | bombus impatiens band 7 protein agap004871-like mrna                              | 361 | 2  | 4.60E-15  | 73.00% |  |
| 1695 | Cl_clus101756_Contig1 | ---NA---                                                                          | 232 | 0  | -         | -      |  |
| 1696 | Cl_clus101757_Contig1 | ---NA---                                                                          | 241 | 0  | -         | -      |  |
| 1697 | Cl_clus101758_Contig1 | ---NA---                                                                          | 241 | 0  | -         | -      |  |
| 1698 | Cl_clus101760_Contig1 | ---NA---                                                                          | 271 | 0  | -         | -      |  |
| 1699 | Cl_clus101761_Contig1 | ---NA---                                                                          | 291 | 0  | -         | -      |  |
| 1700 | Cl_clus101762_Contig1 | ---NA---                                                                          | 365 | 0  | -         | -      |  |
| 1701 | Cl_clus101759_Contig1 | ---NA---                                                                          | 340 | 0  | -         | -      |  |
| 1702 | Cl_clus101763_Contig1 | ---NA---                                                                          | 331 | 0  | -         | -      |  |
| 1703 | Cl_clus101764_Contig1 | ---NA---                                                                          | 207 | 0  | -         | -      |  |
| 1704 | Cl_clus101765_Contig1 | ---NA---                                                                          | 230 | 0  | -         | -      |  |
| 1705 | Cl_clus101766_Contig1 | ---NA---                                                                          | 392 | 0  | -         | -      |  |
| 1706 | Cl_clus101768_Contig1 | ---NA---                                                                          | 246 | 0  | -         | -      |  |
| 1707 | Cl_clus101770_Contig1 | ---NA---                                                                          | 241 | 0  | -         | -      |  |
| 1708 | Cl_clus101769_Contig1 | ---NA---                                                                          | 357 | 0  | -         | -      |  |
| 1709 | Cl_clus101771_Contig1 | ---NA---                                                                          | 322 | 0  | -         | -      |  |
| 1710 | Cl_clus101772_Contig1 | ---NA---                                                                          | 422 | 0  | -         | -      |  |
| 1711 | Cl_clus101773_Contig1 | ---NA---                                                                          | 368 | 0  | -         | -      |  |
| 1712 | Cl_clus101774_Contig1 | ---NA---                                                                          | 233 | 0  | -         | -      |  |
| 1713 | Cl_clus101776_Contig1 | ---NA---                                                                          | 201 | 0  | -         | -      |  |
| 1714 | Cl_clus101777_Contig1 | ---NA---                                                                          | 241 | 0  | -         | -      |  |
| 1715 | Cl_clus101779_Contig1 | oreochromis niloticus succinate dehydrogenase                                     | 420 | 4  | 1.20E-86  | 74.75% |  |
| 1716 | Cl_clus101780_Contig1 | ---NA---                                                                          | 244 | 0  | -         | -      |  |
| 1717 | Cl_clus101775_Contig1 | ---NA---                                                                          | 374 | 0  | -         | -      |  |
| 1718 | Cl_clus101782_Contig1 | ---NA---                                                                          | 301 | 0  | -         | -      |  |
| 1719 | Cl_clus101784_Contig1 | ---NA---                                                                          | 312 | 0  | -         | -      |  |
| 1720 | Cl_clus101781_Contig1 | ---NA---                                                                          | 361 | 0  | -         | -      |  |
| 1721 | Cl_clus101785_Contig1 | ---NA---                                                                          | 355 | 0  | -         | -      |  |
| 1722 | Cl_clus101767_Contig1 | ---NA---                                                                          | 304 | 0  | -         | -      |  |
| 1723 | Cl_clus101787_Contig1 | ---NA---                                                                          | 390 | 0  | -         | -      |  |
| 1724 | Cl_clus101788_Contig1 | ---NA---                                                                          | 309 | 0  | -         | -      |  |
| 1725 | Cl_clus101789_Contig1 | ---NA---                                                                          | 488 | 0  | -         | -      |  |
| 1726 | Cl_clus101790_Contig1 | ---NA---                                                                          | 252 | 0  | -         | -      |  |
| 1727 | Cl_clus101786_Contig1 | anopheles gambiae pest agap003857-pa complete cds                                 | 290 | 3  | 2.10E-24  | 81.00% |  |
| 1728 | Cl_clus101791_Contig1 | ---NA---                                                                          | 351 | 0  | -         | -      |  |
| 1729 | Cl_clus101792_Contig1 | ---NA---                                                                          | 280 | 0  | -         | -      |  |
| 1730 | Cl_clus101793_Contig1 | ---NA---                                                                          | 357 | 0  | -         | -      |  |
| 1731 | Cl_clus101795_Contig1 | ---NA---                                                                          | 564 | 0  | -         | -      |  |

|      |                       |                                                                                           |     |     |          |        |  |
|------|-----------------------|-------------------------------------------------------------------------------------------|-----|-----|----------|--------|--|
| 1732 | Cl_clus101796_Contig1 | ---NA---                                                                                  | 230 | 0 - | -        |        |  |
| 1733 | Cl_clus101798_Contig1 | ---NA---                                                                                  | 312 | 0 - | -        |        |  |
| 1734 | Cl_clus101799_Contig1 | ---NA---                                                                                  | 252 | 0 - | -        |        |  |
| 1735 | Cl_clus101800_Contig1 | ---NA---                                                                                  | 226 | 0 - | -        |        |  |
| 1736 | Cl_clus101803_Contig1 | ---NA---                                                                                  | 301 | 0 - | -        |        |  |
| 1737 | Cl_clus101801_Contig1 | ---NA---                                                                                  | 532 | 0 - | -        |        |  |
| 1738 | Cl_clus101802_Contig1 | ---NA---                                                                                  | 254 | 0 - | -        |        |  |
| 1739 | Cl_clus101808_Contig1 | ---NA---                                                                                  | 229 | 0 - | -        |        |  |
| 1740 | Cl_clus101804_Contig1 | ---NA---                                                                                  | 297 | 0 - | -        |        |  |
| 1741 | Cl_clus101805_Contig1 | ---NA---                                                                                  | 267 | 0 - | -        |        |  |
| 1742 | Cl_clus101810_Contig1 | ---NA---                                                                                  | 325 | 0 - | -        |        |  |
| 1743 | Cl_clus101807_Contig1 | ---NA---                                                                                  | 219 | 0 - | -        |        |  |
| 1744 | Cl_clus101812_Contig1 | ---NA---                                                                                  | 321 | 0 - | -        |        |  |
| 1745 | Cl_clus101813_Contig1 | ---NA---                                                                                  | 270 | 0 - | -        |        |  |
| 1746 | Cl_clus101814_Contig1 | ---NA---                                                                                  | 390 | 0 - | -        |        |  |
| 1747 | Cl_clus101818_Contig1 | ---NA---                                                                                  | 439 | 0 - | -        |        |  |
| 1748 | Cl_clus101819_Contig1 | ---NA---                                                                                  | 420 | 0 - | -        |        |  |
| 1749 | Cl_clus101809_Contig1 | ---NA---                                                                                  | 287 | 0 - | -        |        |  |
| 1750 | Cl_clus101817_Contig1 | ---NA---                                                                                  | 366 | 0 - | -        |        |  |
| 1751 | Cl_clus101822_Contig1 | ---NA---                                                                                  | 338 | 0 - | -        |        |  |
| 1752 | Cl_clus101824_Contig1 | ---NA---                                                                                  | 239 | 0 - | -        |        |  |
| 1753 | Cl_clus101825_Contig1 | ---NA---                                                                                  | 304 | 0 - | -        |        |  |
| 1754 | Cl_clus101826_Contig1 | ---NA---                                                                                  | 407 | 0 - | -        |        |  |
| 1755 | Cl_clus101815_Contig1 | oncomelania hupensis hupensis thioredoxin peroxidase complete cds                         | 424 | 1   | 5.10E-28 | 70.00% |  |
| 1756 | Cl_clus101827_Contig1 | ---NA---                                                                                  | 308 | 0 - | -        |        |  |
| 1757 | Cl_clus101828_Contig1 | ---NA---                                                                                  | 206 | 0 - | -        |        |  |
| 1758 | Cl_clus101829_Contig1 | ---NA---                                                                                  | 590 | 0 - | -        |        |  |
| 1759 | Cl_clus101830_Contig1 | ---NA---                                                                                  | 289 | 0 - | -        |        |  |
| 1760 | Cl_clus101831_Contig1 | ---NA---                                                                                  | 423 | 0 - | -        |        |  |
| 1761 | Cl_clus101832_Contig1 | ---NA---                                                                                  | 215 | 0 - | -        |        |  |
|      |                       |                                                                                           |     |     |          |        |  |
| 1762 | Cl_clus101833_Contig1 | coptotermes formosanus clone cfsni971 serine-arginine protein 55-like protein partial cds | 220 | 8   | 1.50E-62 | 92.50% |  |
| 1763 | Cl_clus101834_Contig1 | ---NA---                                                                                  | 362 | 0 - | -        |        |  |
| 1764 | Cl_clus101835_Contig1 | ---NA---                                                                                  | 275 | 0 - | -        |        |  |
| 1765 | Cl_clus101836_Contig1 | ---NA---                                                                                  | 219 | 0 - | -        |        |  |
| 1766 | Cl_clus101838_Contig1 | ---NA---                                                                                  | 281 | 0 - | -        |        |  |
| 1767 | Cl_clus101839_Contig1 | ---NA---                                                                                  | 242 | 0 - | -        |        |  |
| 1768 | Cl_clus101840_Contig1 | ---NA---                                                                                  | 378 | 0 - | -        |        |  |
| 1769 | Cl_clus101841_Contig1 | ---NA---                                                                                  | 373 | 0 - | -        |        |  |
| 1770 | Cl_clus101842_Contig1 | ---NA---                                                                                  | 318 | 0 - | -        |        |  |
| 1771 | Cl_clus101843_Contig1 | setaria italica cysteine desulfurase mitochondrial-like transcript variant mrna           | 289 | 3   | 4.60E-20 | 81.33% |  |
| 1772 | Cl_clus101844_Contig1 | ---NA---                                                                                  | 266 | 0 - | -        |        |  |
| 1773 | Cl_clus101845_Contig1 | ---NA---                                                                                  | 201 | 0 - | -        |        |  |
| 1774 | Cl_clus101846_Contig1 | ---NA---                                                                                  | 584 | 0 - | -        |        |  |
| 1775 | Cl_clus101847_Contig1 | ---NA---                                                                                  | 634 | 0 - | -        |        |  |
| 1776 | Cl_clus101848_Contig1 | ---NA---                                                                                  | 422 | 0 - | -        |        |  |
| 1777 | Cl_clus101850_Contig1 | ---NA---                                                                                  | 446 | 0 - | -        |        |  |
| 1778 | Cl_clus101851_Contig1 | ---NA---                                                                                  | 327 | 0 - | -        |        |  |
| 1779 | Cl_clus101852_Contig1 | ---NA---                                                                                  | 277 | 0 - | -        |        |  |
| 1780 | Cl_clus101853_Contig1 | ---NA---                                                                                  | 408 | 0 - | -        |        |  |
| 1781 | Cl_clus101854_Contig1 | xenopus laevis succinate dehydrogenase subunit flavoprotein mrna                          | 257 | 1   | 1.60E-12 | 71.00% |  |
| 1782 | Cl_clus101856_Contig1 | ---NA---                                                                                  | 408 | 0 - | -        |        |  |
| 1783 | Cl_clus101857_Contig1 | ---NA---                                                                                  | 476 | 0 - | -        |        |  |
| 1784 | Cl_clus101858_Contig1 | ---NA---                                                                                  | 204 | 0 - | -        |        |  |
| 1785 | Cl_clus101860_Contig1 | ---NA---                                                                                  | 264 | 0 - | -        |        |  |
| 1786 | Cl_clus101861_Contig1 | ---NA---                                                                                  | 319 | 0 - | -        |        |  |
| 1787 | Cl_clus101862_Contig1 | ---NA---                                                                                  | 266 | 0 - | -        |        |  |
| 1788 | Cl_clus101859_Contig1 | ---NA---                                                                                  | 378 | 0 - | -        |        |  |
| 1789 | Cl_clus101863_Contig1 | ---NA---                                                                                  | 393 | 0 - | -        |        |  |

|      |                       |                                                                               |     |    |          |        |  |
|------|-----------------------|-------------------------------------------------------------------------------|-----|----|----------|--------|--|
| 1790 | Cl_clus101864_Contig1 | ---NA---                                                                      | 326 | 0  | -        | -      |  |
| 1791 | Cl_clus101865_Contig1 | ---NA---                                                                      | 258 | 0  | -        | -      |  |
| 1792 | Cl_clus101866_Contig1 | ---NA---                                                                      | 233 | 0  | -        | -      |  |
| 1793 | Cl_clus101868_Contig1 | ---NA---                                                                      | 287 | 0  | -        | -      |  |
| 1794 | Cl_clus101870_Contig1 | ---NA---                                                                      | 412 | 0  | -        | -      |  |
| 1795 | Cl_clus101871_Contig1 | ---NA---                                                                      | 464 | 0  | -        | -      |  |
| 1796 | Cl_clus101873_Contig1 | ---NA---                                                                      | 313 | 0  | -        | -      |  |
| 1797 | Cl_clus101875_Contig1 | ---NA---                                                                      | 338 | 0  | -        | -      |  |
| 1798 | Cl_clus101867_Contig1 | ---NA---                                                                      | 280 | 0  | -        | -      |  |
| 1799 | Cl_clus101874_Contig1 | ---NA---                                                                      | 498 | 0  | -        | -      |  |
| 1800 | Cl_clus101876_Contig1 | ---NA---                                                                      | 433 | 0  | -        | -      |  |
| 1801 | Cl_clus101877_Contig1 | ---NA---                                                                      | 476 | 0  | -        | -      |  |
| 1802 | Cl_clus101880_Contig1 | ---NA---                                                                      | 239 | 0  | -        | -      |  |
| 1803 | Cl_clus101881_Contig1 | ---NA---                                                                      | 294 | 0  | -        | -      |  |
| 1804 | Cl_clus101882_Contig1 | armigeres subalbatus asap id: 40935 single-stranded dna binding mrna sequence | 312 | 2  | 9.70E-42 | 72.00% |  |
| 1805 | Cl_clus101883_Contig1 | ---NA---                                                                      | 397 | 0  | -        | -      |  |
| 1806 | Cl_clus101884_Contig1 | ---NA---                                                                      | 205 | 0  | -        | -      |  |
| 1807 | Cl_clus101885_Contig1 | ---NA---                                                                      | 520 | 0  | -        | -      |  |
| 1808 | Cl_clus101886_Contig1 | ---NA---                                                                      | 396 | 0  | -        | -      |  |
| 1809 | Cl_clus101889_Contig1 | ---NA---                                                                      | 248 | 0  | -        | -      |  |
| 1810 | Cl_clus101887_Contig1 | ---NA---                                                                      | 400 | 0  | -        | -      |  |
| 1811 | Cl_clus101890_Contig1 | ---NA---                                                                      | 299 | 0  | -        | -      |  |
| 1812 | Cl_clus101891_Contig1 | ---NA---                                                                      | 246 | 0  | -        | -      |  |
| 1813 | Cl_clus101892_Contig1 | ---NA---                                                                      | 257 | 0  | -        | -      |  |
| 1814 | Cl_clus101893_Contig1 | ---NA---                                                                      | 350 | 0  | -        | -      |  |
| 1815 | Cl_clus101894_Contig1 | ---NA---                                                                      | 429 | 0  | -        | -      |  |
| 1816 | Cl_clus101895_Contig1 | ---NA---                                                                      | 308 | 0  | -        | -      |  |
| 1817 | Cl_clus101896_Contig1 | ---NA---                                                                      | 301 | 0  | -        | -      |  |
| 1818 | Cl_clus101897_Contig1 | ---NA---                                                                      | 370 | 0  | -        | -      |  |
| 1819 | Cl_clus101898_Contig1 | ---NA---                                                                      | 351 | 0  | -        | -      |  |
| 1820 | Cl_clus101899_Contig1 | ---NA---                                                                      | 218 | 0  | -        | -      |  |
| 1821 | Cl_clus101900_Contig1 | gallus gallus tubulin alpha-4a chain-like transcript variant mrna             | 298 | 20 | 4.80E-58 | 86.00% |  |
| 1822 | Cl_clus101901_Contig1 | maylandia zebra cytoplasmic 2-like transcript variant mrna                    | 246 | 20 | 6.10E-43 | 84.20% |  |
| 1823 | Cl_clus101902_Contig1 | ---NA---                                                                      | 357 | 0  | -        | -      |  |
| 1824 | Cl_clus101904_Contig1 | ---NA---                                                                      | 417 | 0  | -        | -      |  |
| 1825 | Cl_clus101905_Contig1 | ---NA---                                                                      | 354 | 0  | -        | -      |  |
| 1826 | Cl_clus101906_Contig1 | drosophila mojavensis gi23713 (dmoj\gi23713) mrna                             | 354 | 6  | 5.80E-20 | 90.33% |  |
| 1827 | Cl_clus101907_Contig1 | ---NA---                                                                      | 251 | 0  | -        | -      |  |
| 1828 | Cl_clus101908_Contig1 | ---NA---                                                                      | 397 | 0  | -        | -      |  |
| 1829 | Cl_clus101909_Contig1 | ---NA---                                                                      | 229 | 0  | -        | -      |  |
| 1830 | Cl_clus101910_Contig1 | ---NA---                                                                      | 334 | 0  | -        | -      |  |
| 1831 | Cl_clus101911_Contig1 | ---NA---                                                                      | 222 | 0  | -        | -      |  |
| 1832 | Cl_clus101912_Contig1 | ---NA---                                                                      | 277 | 0  | -        | -      |  |
| 1833 | Cl_clus101913_Contig1 | ---NA---                                                                      | 371 | 0  | -        | -      |  |
| 1834 | Cl_clus101914_Contig1 | ---NA---                                                                      | 200 | 0  | -        | -      |  |
| 1835 | Cl_clus101916_Contig1 | ---NA---                                                                      | 207 | 0  | -        | -      |  |
| 1836 | Cl_clus101917_Contig1 | ---NA---                                                                      | 288 | 0  | -        | -      |  |
| 1837 | Cl_clus101919_Contig1 | ---NA---                                                                      | 618 | 0  | -        | -      |  |
| 1838 | Cl_clus101920_Contig1 | ---NA---                                                                      | 214 | 0  | -        | -      |  |
| 1839 | Cl_clus101918_Contig1 | ---NA---                                                                      | 277 | 0  | -        | -      |  |
| 1840 | Cl_clus101921_Contig1 | lycorea halia na+ + atpase alpha-subunit 1 complete cds                       | 371 | 1  | 3.60E-67 | 76.00% |  |
| 1841 | Cl_clus101922_Contig1 | ---NA---                                                                      | 403 | 0  | -        | -      |  |
| 1842 | Cl_clus101923_Contig1 | ---NA---                                                                      | 277 | 0  | -        | -      |  |
| 1843 | Cl_clus101924_Contig1 | ---NA---                                                                      | 327 | 0  | -        | -      |  |
| 1844 | Cl_clus101925_Contig1 | ---NA---                                                                      | 258 | 0  | -        | -      |  |
| 1845 | Cl_clus101926_Contig1 | gryllus bimaculatus gbcontig22909                                             | 434 | 1  | 3.80E-36 | 91.00% |  |
| 1846 | Cl_clus101928_Contig1 | ---NA---                                                                      | 367 | 0  | -        | -      |  |
| 1847 | Cl_clus101929_Contig1 | ---NA---                                                                      | 456 | 0  | -        | -      |  |
| 1848 | Cl_clus101930_Contig1 | ---NA---                                                                      | 246 | 0  | -        | -      |  |



|      |                       |                                                                            |     |     |          |        |  |
|------|-----------------------|----------------------------------------------------------------------------|-----|-----|----------|--------|--|
| 1849 | Cl_clus101903_Contig1 | ---NA---                                                                   | 310 | 0 - | -        |        |  |
| 1850 | Cl_clus101931_Contig1 | ---NA---                                                                   | 299 | 0 - | -        |        |  |
| 1851 | Cl_clus101933_Contig1 | ---NA---                                                                   | 245 | 0 - | -        |        |  |
| 1852 | Cl_clus101934_Contig1 | ---NA---                                                                   | 358 | 0 - | -        |        |  |
| 1853 | Cl_clus101935_Contig1 | ---NA---                                                                   | 409 | 0 - | -        |        |  |
| 1854 | Cl_clus101932_Contig1 | ---NA---                                                                   | 285 | 0 - | -        |        |  |
| 1855 | Cl_clus101936_Contig1 | ---NA---                                                                   | 211 | 0 - | -        |        |  |
| 1856 | Cl_clus101937_Contig1 | ---NA---                                                                   | 215 | 0 - | -        |        |  |
| 1857 | Cl_clus101938_Contig1 | ---NA---                                                                   | 449 | 0 - | -        |        |  |
| 1858 | Cl_clus101939_Contig1 | ---NA---                                                                   | 481 | 0 - | -        |        |  |
| 1859 | Cl_clus101940_Contig1 | ---NA---                                                                   | 466 | 0 - | -        |        |  |
| 1860 | Cl_clus101941_Contig1 | ---NA---                                                                   | 359 | 0 - | -        |        |  |
| 1861 | Cl_clus101942_Contig1 | ---NA---                                                                   | 230 | 0 - | -        |        |  |
| 1862 | Cl_clus101943_Contig1 | ---NA---                                                                   | 280 | 0 - | -        |        |  |
| 1863 | Cl_clus101944_Contig1 | ---NA---                                                                   | 405 | 0 - | -        |        |  |
| 1864 | Cl_clus101945_Contig1 | ---NA---                                                                   | 306 | 0 - | -        |        |  |
| 1865 | Cl_clus101946_Contig1 | ---NA---                                                                   | 396 | 0 - | -        |        |  |
| 1866 | Cl_clus101948_Contig1 | ---NA---                                                                   | 205 | 0 - | -        |        |  |
| 1867 | Cl_clus101949_Contig1 | ---NA---                                                                   | 343 | 0 - | -        |        |  |
| 1868 | Cl_clus101950_Contig1 | ---NA---                                                                   | 353 | 0 - | -        |        |  |
| 1869 | Cl_clus101951_Contig1 | ---NA---                                                                   | 214 | 0 - | -        |        |  |
| 1870 | Cl_clus101952_Contig1 | uroptychus scambus sodium potassium atpase alpha subunit partial cds       | 258 | 20  | 3.10E-53 | 75.65% |  |
| 1871 | Cl_clus101953_Contig1 | ---NA---                                                                   | 349 | 0 - | -        |        |  |
| 1872 | Cl_clus101954_Contig1 | ---NA---                                                                   | 483 | 0 - | -        |        |  |
| 1873 | Cl_clus101955_Contig1 | ---NA---                                                                   | 312 | 0 - | -        |        |  |
| 1874 | Cl_clus101956_Contig1 | ---NA---                                                                   | 218 | 0 - | -        |        |  |
| 1875 | Cl_clus101957_Contig1 | ---NA---                                                                   | 586 | 0 - | -        |        |  |
| 1876 | Cl_clus101958_Contig1 | ---NA---                                                                   | 230 | 0 - | -        |        |  |
| 1877 | Cl_clus101959_Contig1 | ---NA---                                                                   | 530 | 0 - | -        |        |  |
| 1878 | Cl_clus101963_Contig1 | meleagris gallopavo phosphoglycerate kinase-like mrna                      | 612 | 6   | 6.60E-73 | 69.33% |  |
| 1879 | Cl_clus101964_Contig1 | ---NA---                                                                   | 307 | 0 - | -        |        |  |
| 1880 | Cl_clus101960_Contig1 | ---NA---                                                                   | 404 | 0 - | -        |        |  |
| 1881 | Cl_clus101965_Contig1 | ---NA---                                                                   | 307 | 0 - | -        |        |  |
| 1882 | Cl_clus101966_Contig1 | ---NA---                                                                   | 273 | 0 - | -        |        |  |
| 1883 | Cl_clus101967_Contig1 | ---NA---                                                                   | 251 | 0 - | -        |        |  |
| 1884 | Cl_clus101968_Contig1 | ---NA---                                                                   | 257 | 0 - | -        |        |  |
| 1885 | Cl_clus101969_Contig1 | ---NA---                                                                   | 246 | 0 - | -        |        |  |
| 1886 | Cl_clus101970_Contig1 | ---NA---                                                                   | 386 | 0 - | -        |        |  |
| 1887 | Cl_clus101971_Contig1 | ---NA---                                                                   | 313 | 0 - | -        |        |  |
| 1888 | Cl_clus101972_Contig1 | ---NA---                                                                   | 316 | 0 - | -        |        |  |
| 1889 | Cl_clus101973_Contig1 | ---NA---                                                                   | 400 | 0 - | -        |        |  |
| 1890 | Cl_clus101974_Contig1 | ---NA---                                                                   | 423 | 0 - | -        |        |  |
| 1891 | Cl_clus101975_Contig1 | ---NA---                                                                   | 275 | 0 - | -        |        |  |
| 1892 | Cl_clus101976_Contig1 | ---NA---                                                                   | 269 | 0 - | -        |        |  |
| 1893 | Cl_clus101978_Contig1 | ---NA---                                                                   | 250 | 0 - | -        |        |  |
| 1894 | Cl_clus101979_Contig1 | ---NA---                                                                   | 202 | 0 - | -        |        |  |
| 1895 | Cl_clus101981_Contig1 | ---NA---                                                                   | 621 | 0 - | -        |        |  |
| 1896 | Cl_clus101982_Contig1 | anas platyrhynchos polymerase ii (dna directed) polypeptide h partial mrna | 430 | 3   | 1.10E-55 | 76.67% |  |
| 1897 | Cl_clus101977_Contig1 | ---NA---                                                                   | 405 | 0 - | -        |        |  |
| 1898 | Cl_clus101983_Contig1 | ---NA---                                                                   | 271 | 0 - | -        |        |  |
| 1899 | Cl_clus101984_Contig1 | ---NA---                                                                   | 207 | 0 - | -        |        |  |
| 1900 | Cl_clus101985_Contig1 | ---NA---                                                                   | 409 | 0 - | -        |        |  |
| 1901 | Cl_clus101986_Contig1 | ---NA---                                                                   | 231 | 0 - | -        |        |  |
| 1902 | Cl_clus101987_Contig1 | ---NA---                                                                   | 215 | 0 - | -        |        |  |
| 1903 | Cl_clus101988_Contig1 | ---NA---                                                                   | 304 | 0 - | -        |        |  |
| 1904 | Cl_clus101989_Contig1 | ---NA---                                                                   | 276 | 0 - | -        |        |  |
| 1905 | Cl_clus101990_Contig1 | ---NA---                                                                   | 259 | 0 - | -        |        |  |
| 1906 | Cl_clus101991_Contig1 | ---NA---                                                                   | 243 | 0 - | -        |        |  |

|      |                       |                                                         |     |     |          |        |  |
|------|-----------------------|---------------------------------------------------------|-----|-----|----------|--------|--|
| 1907 | Cl_clus101993_Contig1 | ---NA---                                                | 426 | 0 - | -        |        |  |
| 1908 | Cl_clus101994_Contig1 | ---NA---                                                | 299 | 0 - | -        |        |  |
| 1909 | Cl_clus101995_Contig1 | ---NA---                                                | 536 | 0 - | -        |        |  |
| 1910 | Cl_clus101996_Contig1 | ---NA---                                                | 324 | 0 - | -        |        |  |
| 1911 | Cl_clus101997_Contig1 | ---NA---                                                | 393 | 0 - | -        |        |  |
| 1912 | Cl_clus101998_Contig1 | ---NA---                                                | 335 | 0 - | -        |        |  |
| 1913 | Cl_clus102000_Contig1 | ---NA---                                                | 525 | 0 - | -        |        |  |
| 1914 | Cl_clus102001_Contig1 | ---NA---                                                | 596 | 0 - | -        |        |  |
| 1915 | Cl_clus102004_Contig1 | ---NA---                                                | 318 | 0 - | -        |        |  |
| 1916 | Cl_clus102002_Contig1 | ---NA---                                                | 291 | 0 - | -        |        |  |
| 1917 | Cl_clus102005_Contig1 | cnaphalocrocis medinalis ryanodine receptor partial cds | 297 | 2   | 4.20E-84 | 83.00% |  |
| 1918 | Cl_clus102006_Contig1 | ---NA---                                                | 274 | 0 - | -        |        |  |
| 1919 | Cl_clus102008_Contig1 | ---NA---                                                | 407 | 0 - | -        |        |  |
| 1920 | Cl_clus102009_Contig1 | ---NA---                                                | 488 | 0 - | -        |        |  |
| 1921 | Cl_clus102010_Contig1 | ---NA---                                                | 326 | 0 - | -        |        |  |
| 1922 | Cl_clus102007_Contig1 | ---NA---                                                | 342 | 0 - | -        |        |  |
| 1923 | Cl_clus102011_Contig1 | ---NA---                                                | 235 | 0 - | -        |        |  |
| 1924 | Cl_clus102012_Contig1 | ---NA---                                                | 300 | 0 - | -        |        |  |
| 1925 | Cl_clus101999_Contig1 | ---NA---                                                | 468 | 0 - | -        |        |  |
| 1926 | Cl_clus102013_Contig1 | ---NA---                                                | 245 | 0 - | -        |        |  |
| 1927 | Cl_clus102014_Contig1 | ---NA---                                                | 418 | 0 - | -        |        |  |
| 1928 | Cl_clus102016_Contig1 | ---NA---                                                | 748 | 0 - | -        |        |  |
| 1929 | Cl_clus102017_Contig1 | ---NA---                                                | 304 | 0 - | -        |        |  |
| 1930 | Cl_clus102018_Contig1 | ---NA---                                                | 456 | 0 - | -        |        |  |
| 1931 | Cl_clus102020_Contig1 | ---NA---                                                | 451 | 0 - | -        |        |  |
| 1932 | Cl_clus102021_Contig1 | ---NA---                                                | 210 | 0 - | -        |        |  |
| 1933 | Cl_clus102019_Contig1 | ---NA---                                                | 207 | 0 - | -        |        |  |
| 1934 | Cl_clus102022_Contig1 | ---NA---                                                | 437 | 0 - | -        |        |  |
| 1935 | Cl_clus102023_Contig1 | ---NA---                                                | 284 | 0 - | -        |        |  |
| 1936 | Cl_clus102024_Contig1 | ---NA---                                                | 565 | 0 - | -        |        |  |

|      |                       |          |     |     |   |  |  |
|------|-----------------------|----------|-----|-----|---|--|--|
| 1937 | Cl_clus102026_Contig1 | ---NA--- | 229 | 0 - | - |  |  |
| 1938 | Cl_clus102027_Contig1 | ---NA--- | 363 | 0 - | - |  |  |
| 1939 | Cl_clus102028_Contig1 | ---NA--- | 276 | 0 - | - |  |  |
| 1940 | Cl_clus102029_Contig1 | ---NA--- | 248 | 0 - | - |  |  |
| 1941 | Cl_clus102030_Contig1 | ---NA--- | 373 | 0 - | - |  |  |
| 1942 | Cl_clus102032_Contig1 | ---NA--- | 206 | 0 - | - |  |  |
| 1943 | Cl_clus102033_Contig1 | ---NA--- | 399 | 0 - | - |  |  |
| 1944 | Cl_clus102034_Contig1 | ---NA--- | 322 | 0 - | - |  |  |
| 1945 | Cl_clus102035_Contig1 | ---NA--- | 360 | 0 - | - |  |  |
| 1946 | Cl_clus102036_Contig1 | ---NA--- | 298 | 0 - | - |  |  |
| 1947 | Cl_clus102038_Contig1 | ---NA--- | 374 | 0 - | - |  |  |
| 1948 | Cl_clus102039_Contig1 | ---NA--- | 445 | 0 - | - |  |  |
| 1949 | Cl_clus102031_Contig1 | ---NA--- | 311 | 0 - | - |  |  |
| 1950 | Cl_clus102037_Contig1 | ---NA--- | 257 | 0 - | - |  |  |
| 1951 | Cl_clus102040_Contig1 | ---NA--- | 248 | 0 - | - |  |  |
| 1952 | Cl_clus102041_Contig1 | ---NA--- | 210 | 0 - | - |  |  |
| 1953 | Cl_clus102043_Contig1 | ---NA--- | 343 | 0 - | - |  |  |
| 1954 | Cl_clus102044_Contig1 | ---NA--- | 210 | 0 - | - |  |  |
| 1955 | Cl_clus102045_Contig1 | ---NA--- | 245 | 0 - | - |  |  |
| 1956 | Cl_clus102046_Contig1 | ---NA--- | 250 | 0 - | - |  |  |
| 1957 | Cl_clus102047_Contig1 | ---NA--- | 283 | 0 - | - |  |  |
| 1958 | Cl_clus102048_Contig1 | ---NA--- | 379 | 0 - | - |  |  |
| 1959 | Cl_clus102049_Contig1 | ---NA--- | 496 | 0 - | - |  |  |
| 1960 | Cl_clus102050_Contig1 | ---NA--- | 389 | 0 - | - |  |  |
| 1961 | Cl_clus102051_Contig1 | ---NA--- | 477 | 0 - | - |  |  |
| 1962 | Cl_clus102053_Contig1 | ---NA--- | 788 | 0 - | - |  |  |
| 1963 | Cl_clus102054_Contig1 | ---NA--- | 355 | 0 - | - |  |  |
| 1964 | Cl_clus102056_Contig1 | ---NA--- | 314 | 0 - | - |  |  |
| 1965 | Cl_clus102057_Contig1 | ---NA--- | 397 | 0 - | - |  |  |
| 1966 | Cl_clus102058_Contig1 | ---NA--- | 379 | 0 - | - |  |  |

|      |                       |                                                                                            |     |    |           |        |  |
|------|-----------------------|--------------------------------------------------------------------------------------------|-----|----|-----------|--------|--|
| 1967 | Cl_clus102059_Contig1 | ---NA---                                                                                   | 277 | 0  | -         | -      |  |
| 1968 | Cl_clus102060_Contig1 | ---NA---                                                                                   | 390 | 0  | -         | -      |  |
| 1969 | Cl_clus102061_Contig1 | ---NA---                                                                                   | 295 | 0  | -         | -      |  |
| 1970 | Cl_clus102062_Contig1 | ---NA---                                                                                   | 441 | 0  | -         | -      |  |
| 1971 | Cl_clus102063_Contig1 | ---NA---                                                                                   | 316 | 0  | -         | -      |  |
| 1972 | Cl_clus102064_Contig1 | megachile rotundata 40s ribosomal protein s28-like mrna                                    | 362 | 1  | 4.00E-41  | 79.00% |  |
| 1973 | Cl_clus102065_Contig1 | ---NA---                                                                                   | 206 | 0  | -         | -      |  |
| 1974 | Cl_clus102066_Contig1 | ---NA---                                                                                   | 324 | 0  | -         | -      |  |
| 1975 | Cl_clus102067_Contig1 | arabidopsis thaliana at4g21960 t8o5_170 complete cds                                       | 276 | 20 | 1.30E-121 | 93.05% |  |
| 1976 | Cl_clus102068_Contig1 | ---NA---                                                                                   | 212 | 0  | -         | -      |  |
| 1977 | Cl_clus102069_Contig1 | ictalurus furcatus clone cbzc20143 ras-related c3 botulinum toxin substrate 3 complete cds | 333 | 3  | 1.70E-64  | 76.67% |  |
| 1978 | Cl_clus102070_Contig1 | ---NA---                                                                                   | 267 | 0  | -         | -      |  |
| 1979 | Cl_clus102071_Contig1 | ---NA---                                                                                   | 284 | 0  | -         | -      |  |
| 1980 | Cl_clus102072_Contig1 | ---NA---                                                                                   | 492 | 0  | -         | -      |  |
| 1981 | Cl_clus102074_Contig1 | ---NA---                                                                                   | 334 | 0  | -         | -      |  |
| 1982 | Cl_clus102075_Contig1 | ---NA---                                                                                   | 392 | 0  | -         | -      |  |
| 1983 | Cl_clus102076_Contig1 | ---NA---                                                                                   | 567 | 0  | -         | -      |  |
| 1984 | Cl_clus102077_Contig1 | ---NA---                                                                                   | 431 | 0  | -         | -      |  |
| 1985 | Cl_clus102078_Contig1 | ---NA---                                                                                   | 466 | 0  | -         | -      |  |
| 1986 | Cl_clus102079_Contig1 | ---NA---                                                                                   | 421 | 0  | -         | -      |  |
| 1987 | Cl_clus102080_Contig1 | ---NA---                                                                                   | 330 | 0  | -         | -      |  |
| 1988 | Cl_clus102081_Contig1 | ---NA---                                                                                   | 288 | 0  | -         | -      |  |
| 1989 | Cl_clus102082_Contig1 | ---NA---                                                                                   | 245 | 0  | -         | -      |  |
| 1990 | Cl_clus102083_Contig1 | ---NA---                                                                                   | 254 | 0  | -         | -      |  |
| 1991 | Cl_clus102084_Contig1 | ---NA---                                                                                   | 354 | 0  | -         | -      |  |
| 1992 | Cl_clus102086_Contig1 | ---NA---                                                                                   | 510 | 0  | -         | -      |  |
| 1993 | Cl_clus102087_Contig1 | ---NA---                                                                                   | 224 | 0  | -         | -      |  |
| 1994 | Cl_clus102088_Contig1 | ---NA---                                                                                   | 457 | 0  | -         | -      |  |
| 1995 | Cl_clus102089_Contig1 | ---NA---                                                                                   | 623 | 0  | -         | -      |  |

|      |                       |          |     |   |   |   |  |
|------|-----------------------|----------|-----|---|---|---|--|
| 1996 | Cl_clus102090_Contig1 | ---NA--- | 437 | 0 | - | - |  |
| 1997 | Cl_clus102091_Contig1 | ---NA--- | 204 | 0 | - | - |  |
| 1998 | Cl_clus102092_Contig1 | ---NA--- | 366 | 0 | - | - |  |
| 1999 | Cl_clus102093_Contig1 | ---NA--- | 415 | 0 | - | - |  |
| 2000 | Cl_clus102094_Contig1 | ---NA--- | 210 | 0 | - | - |  |
| 2001 | Cl_clus102095_Contig1 | ---NA--- | 283 | 0 | - | - |  |
| 2002 | Cl_clus102096_Contig1 | ---NA--- | 471 | 0 | - | - |  |
| 2003 | Cl_clus102097_Contig1 | ---NA--- | 331 | 0 | - | - |  |
| 2004 | Cl_clus102100_Contig1 | ---NA--- | 461 | 0 | - | - |  |
| 2005 | Cl_clus102102_Contig1 | ---NA--- | 278 | 0 | - | - |  |
| 2006 | Cl_clus102103_Contig1 | ---NA--- | 315 | 0 | - | - |  |
| 2007 | Cl_clus102099_Contig2 | ---NA--- | 503 | 0 | - | - |  |
| 2008 | Cl_clus102101_Contig1 | ---NA--- | 307 | 0 | - | - |  |
| 2009 | Cl_clus102104_Contig1 | ---NA--- | 258 | 0 | - | - |  |
| 2010 | Cl_clus102105_Contig1 | ---NA--- | 349 | 0 | - | - |  |
| 2011 | Cl_clus102106_Contig1 | ---NA--- | 255 | 0 | - | - |  |
| 2012 | Cl_clus102107_Contig1 | ---NA--- | 216 | 0 | - | - |  |
| 2013 | Cl_clus102108_Contig1 | ---NA--- | 348 | 0 | - | - |  |
| 2014 | Cl_clus102109_Contig1 | ---NA--- | 264 | 0 | - | - |  |
| 2015 | Cl_clus102110_Contig1 | ---NA--- | 222 | 0 | - | - |  |
| 2016 | Cl_clus102113_Contig1 | ---NA--- | 216 | 0 | - | - |  |
| 2017 | Cl_clus102114_Contig1 | ---NA--- | 234 | 0 | - | - |  |
| 2018 | Cl_clus102115_Contig1 | ---NA--- | 414 | 0 | - | - |  |
| 2019 | Cl_clus102112_Contig1 | ---NA--- | 403 | 0 | - | - |  |
| 2020 | Cl_clus102116_Contig1 | ---NA--- | 286 | 0 | - | - |  |
| 2021 | Cl_clus102111_Contig1 | ---NA--- | 254 | 0 | - | - |  |
| 2022 | Cl_clus102117_Contig1 | ---NA--- | 258 | 0 | - | - |  |
| 2023 | Cl_clus102118_Contig1 | ---NA--- | 408 | 0 | - | - |  |
| 2024 | Cl_clus102119_Contig1 | ---NA--- | 488 | 0 | - | - |  |
| 2025 | Cl_clus102120_Contig1 | ---NA--- | 310 | 0 | - | - |  |

|      |                       |          |     |     |   |
|------|-----------------------|----------|-----|-----|---|
| 2026 | Cl_clus102121_Contig1 | ---NA--- | 308 | 0 - | - |
| 2027 | Cl_clus102122_Contig1 | ---NA--- | 377 | 0 - | - |
| 2028 | Cl_clus102123_Contig1 | ---NA--- | 248 | 0 - | - |
| 2029 | Cl_clus102124_Contig1 | ---NA--- | 377 | 0 - | - |
| 2030 | Cl_clus102125_Contig1 | ---NA--- | 343 | 0 - | - |
| 2031 | Cl_clus102126_Contig1 | ---NA--- | 307 | 0 - | - |
| 2032 | Cl_clus102127_Contig1 | ---NA--- | 377 | 0 - | - |
| 2033 | Cl_clus102129_Contig1 | ---NA--- | 273 | 0 - | - |
| 2034 | Cl_clus102130_Contig1 | ---NA--- | 329 | 0 - | - |
| 2035 | Cl_clus102131_Contig1 | ---NA--- | 360 | 0 - | - |
| 2036 | Cl_clus102132_Contig1 | ---NA--- | 224 | 0 - | - |
| 2037 | Cl_clus102136_Contig1 | ---NA--- | 288 | 0 - | - |
| 2038 | Cl_clus102133_Contig1 | ---NA--- | 400 | 0 - | - |
| 2039 | Cl_clus102135_Contig1 | ---NA--- | 285 | 0 - | - |
| 2040 | Cl_clus102137_Contig1 | ---NA--- | 251 | 0 - | - |
| 2041 | Cl_clus102138_Contig1 | ---NA--- | 226 | 0 - | - |
| 2042 | Cl_clus102140_Contig1 | ---NA--- | 214 | 0 - | - |
| 2043 | Cl_clus102141_Contig1 | ---NA--- | 205 | 0 - | - |
| 2044 | Cl_clus102142_Contig1 | ---NA--- | 277 | 0 - | - |
| 2045 | Cl_clus102144_Contig1 | ---NA--- | 384 | 0 - | - |
| 2046 | Cl_clus102139_Contig1 | ---NA--- | 376 | 0 - | - |
| 2047 | Cl_clus102145_Contig1 | ---NA--- | 277 | 0 - | - |
| 2048 | Cl_clus102147_Contig1 | ---NA--- | 283 | 0 - | - |
| 2049 | Cl_clus102148_Contig1 | ---NA--- | 361 | 0 - | - |
| 2050 | Cl_clus102149_Contig1 | ---NA--- | 286 | 0 - | - |
| 2051 | Cl_clus102153_Contig1 | ---NA--- | 436 | 0 - | - |
| 2052 | Cl_clus102146_Contig1 | ---NA--- | 414 | 0 - | - |
| 2053 | Cl_clus102150_Contig1 | ---NA--- | 824 | 0 - | - |
| 2054 | Cl_clus102151_Contig1 | ---NA--- | 283 | 0 - | - |
| 2055 | Cl_clus102152_Contig1 | ---NA--- | 212 | 0 - | - |

|      |                       |                                                                                                               |     |     |                  |
|------|-----------------------|---------------------------------------------------------------------------------------------------------------|-----|-----|------------------|
| 2056 | Cl_clus102154_Contig1 | ---NA---                                                                                                      | 242 | 0 - | -                |
| 2057 | Cl_clus102155_Contig1 | ---NA---                                                                                                      | 258 | 0 - | -                |
| 2058 | Cl_clus102156_Contig1 | ---NA---                                                                                                      | 319 | 0 - | -                |
| 2059 | Cl_clus102157_Contig1 | ---NA---                                                                                                      | 301 | 0 - | -                |
| 2060 | Cl_clus102158_Contig1 | ---NA---                                                                                                      | 329 | 0 - | -                |
| 2061 | Cl_clus102159_Contig1 | ---NA---                                                                                                      | 288 | 0 - | -                |
| 2062 | Cl_clus102161_Contig1 | ---NA---                                                                                                      | 458 | 0 - | -                |
| 2063 | Cl_clus102160_Contig1 | ---NA---                                                                                                      | 403 | 0 - | -                |
| 2064 | Cl_clus102162_Contig1 | maylandia zebra ras-related protein rab-10-like transcript variant mrna                                       | 485 | 20  | 2.00E-122 74.70% |
| 2065 | Cl_clus102163_Contig1 | ---NA---                                                                                                      | 276 | 0 - | -                |
| 2066 | Cl_clus102164_Contig1 | ---NA---                                                                                                      | 255 | 0 - | -                |
| 2067 | Cl_clus102166_Contig1 | ---NA---                                                                                                      | 409 | 0 - | -                |
| 2068 | Cl_clus102165_Contig1 | ---NA---                                                                                                      | 756 | 0 - | -                |
| 2069 | Cl_clus102167_Contig1 | ---NA---                                                                                                      | 351 | 0 - | -                |
| 2070 | Cl_clus102169_Contig1 | ---NA---                                                                                                      | 298 | 0 - | -                |
| 2071 | Cl_clus102171_Contig1 | ---NA---                                                                                                      | 250 | 0 - | -                |
| 2072 | Cl_clus102173_Contig1 | ---NA---                                                                                                      | 321 | 0 - | -                |
| 2073 | Cl_clus102175_Contig1 | ficedula albicollis nadh dehydrogenase fe-s protein 20kda (nadh-coenzyme q reductase) transcript variant mrna | 453 | 4   | 6.20E-78 80.50%  |
| 2074 | Cl_clus102176_Contig1 | ---NA---                                                                                                      | 384 | 0 - | -                |
| 2075 | Cl_clus102172_Contig1 | ---NA---                                                                                                      | 311 | 0 - | -                |
| 2076 | Cl_clus102174_Contig1 | salpingoeca atcc 50818 atp-dependent rna helicase dbp2 complete cds                                           | 229 | 4   | 5.20E-37 76.75%  |
| 2077 | Cl_clus102177_Contig1 | ---NA---                                                                                                      | 451 | 0 - | -                |
| 2078 | Cl_clus102178_Contig1 | ---NA---                                                                                                      | 460 | 0 - | -                |
| 2079 | Cl_clus102179_Contig1 | ---NA---                                                                                                      | 236 | 0 - | -                |
| 2080 | Cl_clus102180_Contig1 | ---NA---                                                                                                      | 272 | 0 - | -                |
| 2081 | Cl_clus102181_Contig1 | ---NA---                                                                                                      | 212 | 0 - | -                |
| 2082 | Cl_clus102182_Contig1 | drosophila willistoni gk23721 (dwil\gk23721) mrna                                                             | 512 | 5   | 1.30E-74 76.60%  |
| 2083 | Cl_clus102183_Contig1 | ---NA---                                                                                                      | 290 | 0 - | -                |
| 2084 | Cl_clus102184_Contig1 | ---NA---                                                                                                      | 556 | 0 - | -                |

|      |                       |                                                                                            |     |    |          |        |  |
|------|-----------------------|--------------------------------------------------------------------------------------------|-----|----|----------|--------|--|
| 2085 | Cl_clus102186_Contig1 | ---NA---                                                                                   | 510 | 0  | -        | -      |  |
| 2086 | Cl_clus102187_Contig1 | ictalurus punctatus v-type proton atpase 16 kda proteolipid subunit mrna                   | 245 | 6  | 6.90E-36 | 81.00% |  |
| 2087 | Cl_clus102188_Contig1 | ---NA---                                                                                   | 490 | 0  | -        | -      |  |
| 2088 | Cl_clus102189_Contig1 | ---NA---                                                                                   | 201 | 0  | -        | -      |  |
| 2089 | Cl_clus102191_Contig1 | ---NA---                                                                                   | 271 | 0  | -        | -      |  |
| 2090 | Cl_clus102192_Contig1 | oryctolagus cuniculus guanine nucleotide-binding beta-4 subunit-like mrna                  | 279 | 2  | 3.40E-53 | 76.50% |  |
| 2091 | Cl_clus102194_Contig1 | ---NA---                                                                                   | 402 | 0  | -        | -      |  |
| 2092 | Cl_clus102195_Contig1 | ---NA---                                                                                   | 326 | 0  | -        | -      |  |
| 2093 | Cl_clus102196_Contig1 | ---NA---                                                                                   | 262 | 0  | -        | -      |  |
| 2094 | Cl_clus102197_Contig1 | ---NA---                                                                                   | 456 | 0  | -        | -      |  |
| 2095 | Cl_clus102198_Contig1 | ---NA---                                                                                   | 413 | 0  | -        | -      |  |
| 2096 | Cl_clus102199_Contig1 | ---NA---                                                                                   | 313 | 0  | -        | -      |  |
| 2097 | Cl_clus102200_Contig1 | ---NA---                                                                                   | 269 | 0  | -        | -      |  |
| 2098 | Cl_clus102201_Contig1 | ---NA---                                                                                   | 343 | 0  | -        | -      |  |
| 2099 | Cl_clus102202_Contig1 | ---NA---                                                                                   | 260 | 0  | -        | -      |  |
| 2100 | Cl_clus102203_Contig1 | ---NA---                                                                                   | 238 | 0  | -        | -      |  |
| 2101 | Cl_clus102204_Contig1 | ---NA---                                                                                   | 309 | 0  | -        | -      |  |
| 2102 | Cl_clus102205_Contig1 | ---NA---                                                                                   | 293 | 0  | -        | -      |  |
| 2103 | Cl_clus102207_Contig1 | ---NA---                                                                                   | 350 | 0  | -        | -      |  |
| 2104 | Cl_clus102208_Contig1 | ---NA---                                                                                   | 320 | 0  | -        | -      |  |
| 2105 | Cl_clus102209_Contig1 | ---NA---                                                                                   | 268 | 0  | -        | -      |  |
| 2106 | Cl_clus102210_Contig1 | ---NA---                                                                                   | 318 | 0  | -        | -      |  |
| 2107 | Cl_clus102211_Contig1 | ---NA---                                                                                   | 206 | 0  | -        | -      |  |
| 2108 | Cl_clus102213_Contig1 | ---NA---                                                                                   | 556 | 0  | -        | -      |  |
| 2109 | Cl_clus102214_Contig1 | ---NA---                                                                                   | 230 | 0  | -        | -      |  |
| 2110 | Cl_clus102215_Contig1 | ---NA---                                                                                   | 327 | 0  | -        | -      |  |
| 2111 | Cl_clus102216_Contig1 | ---NA---                                                                                   | 293 | 0  | -        | -      |  |
| 2112 | Cl_clus102217_Contig1 | ---NA---                                                                                   | 427 | 0  | -        | -      |  |
| 2113 | Cl_clus102218_Contig1 | suberites fuscus isolate toa57 chaperonin complex component tcp-1 beta subunit partial cds | 328 | 3  | 4.40E-40 | 72.00% |  |
| 2114 | Cl_clus102219_Contig1 | ---NA---                                                                                   | 401 | 0  | -        | -      |  |
| 2115 | Cl_clus102220_Contig1 | ---NA---                                                                                   | 339 | 0  | -        | -      |  |
| 2116 | Cl_clus102221_Contig1 | ---NA---                                                                                   | 389 | 0  | -        | -      |  |
| 2117 | Cl_clus102222_Contig1 | setaria italica adp-ribosylation factor-like transcript variant mrna                       | 351 | 20 | 3.00E-55 | 77.95% |  |
| 2118 | Cl_clus102224_Contig1 | ---NA---                                                                                   | 317 | 0  | -        | -      |  |
| 2119 | Cl_clus102225_Contig1 | ---NA---                                                                                   | 343 | 0  | -        | -      |  |
| 2120 | Cl_clus102226_Contig1 | ---NA---                                                                                   | 223 | 0  | -        | -      |  |
| 2121 | Cl_clus102227_Contig1 | paracyclops nana heat shock protein 70 complete cds                                        | 287 | 2  | 4.90E-26 | 72.00% |  |
| 2122 | Cl_clus102229_Contig1 | ---NA---                                                                                   | 349 | 0  | -        | -      |  |
| 2123 | Cl_clus102230_Contig1 | ---NA---                                                                                   | 437 | 0  | -        | -      |  |
| 2124 | Cl_clus102231_Contig1 | ---NA---                                                                                   | 276 | 0  | -        | -      |  |
| 2125 | Cl_clus102232_Contig1 | ---NA---                                                                                   | 645 | 0  | -        | -      |  |
| 2126 | Cl_clus102233_Contig1 | ---NA---                                                                                   | 251 | 0  | -        | -      |  |
| 2127 | Cl_clus102234_Contig1 | ---NA---                                                                                   | 340 | 0  | -        | -      |  |
| 2128 | Cl_clus102235_Contig1 | ---NA---                                                                                   | 296 | 0  | -        | -      |  |
| 2129 | Cl_clus102236_Contig1 | ---NA---                                                                                   | 208 | 0  | -        | -      |  |
| 2130 | Cl_clus102237_Contig1 | ---NA---                                                                                   | 439 | 0  | -        | -      |  |
| 2131 | Cl_clus102239_Contig1 | drosophila ananassae gf13398 (dana\gf13398) mrna                                           | 223 | 1  | 4.70E-50 | 85.00% |  |
| 2132 | Cl_clus102238_Contig1 | ---NA---                                                                                   | 277 | 0  | -        | -      |  |
| 2133 | Cl_clus102240_Contig1 | ---NA---                                                                                   | 418 | 0  | -        | -      |  |
| 2134 | Cl_clus102241_Contig1 | ---NA---                                                                                   | 227 | 0  | -        | -      |  |
| 2135 | Cl_clus102242_Contig1 | ---NA---                                                                                   | 270 | 0  | -        | -      |  |
| 2136 | Cl_clus102243_Contig1 | ---NA---                                                                                   | 445 | 0  | -        | -      |  |
| 2137 | Cl_clus102244_Contig1 | ---NA---                                                                                   | 342 | 0  | -        | -      |  |
| 2138 | Cl_clus102245_Contig1 | ---NA---                                                                                   | 272 | 0  | -        | -      |  |
| 2139 | Cl_clus102246_Contig1 | ---NA---                                                                                   | 265 | 0  | -        | -      |  |
| 2140 | Cl_clus102247_Contig1 | ---NA---                                                                                   | 375 | 0  | -        | -      |  |
| 2141 | Cl_clus102248_Contig1 | ---NA---                                                                                   | 437 | 0  | -        | -      |  |

|      |                       |                                                                         |     |     |          |        |  |
|------|-----------------------|-------------------------------------------------------------------------|-----|-----|----------|--------|--|
| 2142 | Cl_clus102249_Contig1 | ---NA---                                                                | 307 | 0 - | -        |        |  |
| 2143 | Cl_clus102251_Contig1 | ---NA---                                                                | 303 | 0 - | -        |        |  |
| 2144 | Cl_clus102250_Contig1 | ---NA---                                                                | 277 | 0 - | -        |        |  |
| 2145 | Cl_clus102252_Contig1 | ---NA---                                                                | 200 | 0 - | -        |        |  |
| 2146 | Cl_clus102253_Contig1 | ---NA---                                                                | 413 | 0 - | -        |        |  |
| 2147 | Cl_clus102255_Contig1 | ---NA---                                                                | 377 | 0 - | -        |        |  |
| 2148 | Cl_clus102257_Contig1 | ---NA---                                                                | 536 | 0 - | -        |        |  |
| 2149 | Cl_clus102258_Contig1 | ---NA---                                                                | 287 | 0 - | -        |        |  |
| 2150 | Cl_clus102260_Contig1 | ---NA---                                                                | 311 | 0 - | -        |        |  |
| 2151 | Cl_clus102261_Contig1 | ---NA---                                                                | 548 | 0 - | -        |        |  |
| 2152 | Cl_clus102262_Contig1 | ---NA---                                                                | 346 | 0 - | -        |        |  |
| 2153 | Cl_clus102263_Contig1 | ---NA---                                                                | 558 | 0 - | -        |        |  |
| 2154 | Cl_clus102264_Contig1 | ---NA---                                                                | 334 | 0 - | -        |        |  |
| 2155 | Cl_clus102265_Contig1 | ---NA---                                                                | 478 | 0 - | -        |        |  |
| 2156 | Cl_clus102266_Contig1 | ---NA---                                                                | 208 | 0 - | -        |        |  |
| 2157 | Cl_clus102267_Contig1 | ---NA---                                                                | 341 | 0 - | -        |        |  |
| 2158 | Cl_clus102268_Contig1 | ---NA---                                                                | 315 | 0 - | -        |        |  |
| 2159 | Cl_clus102269_Contig1 | ---NA---                                                                | 325 | 0 - | -        |        |  |
| 2160 | Cl_clus102270_Contig1 | ---NA---                                                                | 616 | 0 - | -        |        |  |
| 2161 | Cl_clus102271_Contig1 | ---NA---                                                                | 265 | 0 - | -        |        |  |
| 2162 | Cl_clus102272_Contig1 | ---NA---                                                                | 453 | 0 - | -        |        |  |
| 2163 | Cl_clus102273_Contig1 | ---NA---                                                                | 284 | 0 - | -        |        |  |
| 2164 | Cl_clus102274_Contig1 | ---NA---                                                                | 415 | 0 - | -        |        |  |
| 2165 | Cl_clus102276_Contig1 | ---NA---                                                                | 371 | 0 - | -        |        |  |
| 2166 | Cl_clus102277_Contig1 | ---NA---                                                                | 316 | 0 - | -        |        |  |
| 2167 | Cl_clus102278_Contig1 | ---NA---                                                                | 262 | 0 - | -        |        |  |
| 2168 | Cl_clus102279_Contig1 | ficedula albicollis tubulin alpha-1c chain-like transcript variant mrna | 257 | 17  | 1.30E-51 | 82.41% |  |
| 2169 | Cl_clus102280_Contig1 | ---NA---                                                                | 248 | 0 - | -        |        |  |
| 2170 | Cl_clus102282_Contig1 | ---NA---                                                                | 506 | 0 - | -        |        |  |
| 2171 | Cl_clus102283_Contig1 | ---NA---                                                                | 516 | 0 - | -        |        |  |

|      |                       |                                                                         |     |     |          |        |  |
|------|-----------------------|-------------------------------------------------------------------------|-----|-----|----------|--------|--|
| 2172 | Cl_clus102284_Contig1 | ---NA---                                                                | 276 | 0 - | -        |        |  |
| 2173 | Cl_clus102285_Contig1 | ---NA---                                                                | 439 | 0 - | -        |        |  |
| 2174 | Cl_clus102286_Contig1 | ---NA---                                                                | 252 | 0 - | -        |        |  |
| 2175 | Cl_clus102287_Contig1 | ---NA---                                                                | 267 | 0 - | -        |        |  |
| 2176 | Cl_clus102288_Contig1 | ---NA---                                                                | 210 | 0 - | -        |        |  |
| 2177 | Cl_clus102289_Contig1 | ---NA---                                                                | 347 | 0 - | -        |        |  |
| 2178 | Cl_clus102290_Contig1 | ---NA---                                                                | 465 | 0 - | -        |        |  |
| 2179 | Cl_clus102291_Contig1 | ---NA---                                                                | 351 | 0 - | -        |        |  |
| 2180 | Cl_clus102292_Contig1 | ---NA---                                                                | 225 | 0 - | -        |        |  |
| 2181 | Cl_clus102293_Contig1 | capsaspora owczaraki atcc 30864 superoxide dismutase cu-zn complete cds | 393 | 6   | 2.40E-25 | 73.33% |  |
| 2182 | Cl_clus102294_Contig1 | ---NA---                                                                | 416 | 0 - | -        |        |  |
| 2183 | Cl_clus102297_Contig1 | ---NA---                                                                | 421 | 0 - | -        |        |  |
| 2184 | Cl_clus102298_Contig1 | ---NA---                                                                | 404 | 0 - | -        |        |  |
| 2185 | Cl_clus102300_Contig1 | ---NA---                                                                | 420 | 0 - | -        |        |  |
| 2186 | Cl_clus102295_Contig1 | ---NA---                                                                | 571 | 0 - | -        |        |  |
| 2187 | Cl_clus102301_Contig1 | ---NA---                                                                | 297 | 0 - | -        |        |  |
| 2188 | Cl_clus102302_Contig1 | ---NA---                                                                | 434 | 0 - | -        |        |  |
| 2189 | Cl_clus102303_Contig1 | ---NA---                                                                | 373 | 0 - | -        |        |  |
| 2190 | Cl_clus102304_Contig1 | ---NA---                                                                | 400 | 0 - | -        |        |  |
| 2191 | Cl_clus102305_Contig1 | ---NA---                                                                | 350 | 0 - | -        |        |  |
| 2192 | Cl_clus102306_Contig1 | ---NA---                                                                | 251 | 0 - | -        |        |  |
| 2193 | Cl_clus102308_Contig1 | ---NA---                                                                | 424 | 0 - | -        |        |  |
| 2194 | Cl_clus102309_Contig1 | ---NA---                                                                | 248 | 0 - | -        |        |  |
| 2195 | Cl_clus102310_Contig1 | ---NA---                                                                | 533 | 0 - | -        |        |  |
| 2196 | Cl_clus102311_Contig1 | ---NA---                                                                | 584 | 0 - | -        |        |  |
| 2197 | Cl_clus102312_Contig1 | ---NA---                                                                | 366 | 0 - | -        |        |  |
| 2198 | Cl_clus102313_Contig1 | ---NA---                                                                | 235 | 0 - | -        |        |  |
| 2199 | Cl_clus102314_Contig1 | ---NA---                                                                | 286 | 0 - | -        |        |  |
| 2200 | Cl_clus102315_Contig1 | ---NA---                                                                | 221 | 0 - | -        |        |  |

|      |                       |                                                                                            |     |     |          |        |  |
|------|-----------------------|--------------------------------------------------------------------------------------------|-----|-----|----------|--------|--|
| 2201 | Cl_clus102316_Contig1 | ---NA---                                                                                   | 310 | 0 - | -        |        |  |
| 2202 | Cl_clus102317_Contig1 | ---NA---                                                                                   | 290 | 0 - | -        |        |  |
| 2203 | Cl_clus102318_Contig1 | ---NA---                                                                                   | 391 | 0 - | -        |        |  |
| 2204 | Cl_clus102321_Contig1 | ---NA---                                                                                   | 227 | 0 - | -        |        |  |
| 2205 | Cl_clus102322_Contig1 | ---NA---                                                                                   | 281 | 0 - | -        |        |  |
| 2206 | Cl_clus102323_Contig1 | ---NA---                                                                                   | 339 | 0 - | -        |        |  |
| 2207 | Cl_clus102324_Contig1 | ---NA---                                                                                   | 328 | 0 - | -        |        |  |
| 2208 | Cl_clus102325_Contig1 | ---NA---                                                                                   | 382 | 0 - | -        |        |  |
| 2209 | Cl_clus102326_Contig1 | ---NA---                                                                                   | 642 | 0 - | -        |        |  |
| 2210 | Cl_clus102327_Contig1 | ---NA---                                                                                   | 413 | 0 - | -        |        |  |
| 2211 | Cl_clus102328_Contig1 | ---NA---                                                                                   | 246 | 0 - | -        |        |  |
| 2212 | Cl_clus102329_Contig1 | ---NA---                                                                                   | 273 | 0 - | -        |        |  |
| 2213 | Cl_clus102330_Contig1 | ---NA---                                                                                   | 350 | 0 - | -        |        |  |
| 2214 | Cl_clus102331_Contig1 | ---NA---                                                                                   | 599 | 0 - | -        |        |  |
| 2215 | Cl_clus102332_Contig1 | ---NA---                                                                                   | 494 | 0 - | -        |        |  |
| 2216 | Cl_clus102333_Contig1 | ---NA---                                                                                   | 341 | 0 - | -        |        |  |
| 2217 | Cl_clus102334_Contig1 | ---NA---                                                                                   | 331 | 0 - | -        |        |  |
| 2218 | Cl_clus102335_Contig1 | ---NA---                                                                                   | 207 | 0 - | -        |        |  |
| 2219 | Cl_clus102336_Contig1 | ---NA---                                                                                   | 294 | 0 - | -        |        |  |
| 2220 | Cl_clus102338_Contig1 | ---NA---                                                                                   | 243 | 0 - | -        |        |  |
| 2221 | Cl_clus102340_Contig1 | oreochromis niloticus utp--glucose-1-phosphate uridylyltransferase-like<br>mrna            | 362 | 5   | 4.00E-22 | 71.00% |  |
| 2222 | Cl_clus102341_Contig1 | ---NA---                                                                                   | 213 | 0 - | -        |        |  |
| 2223 | Cl_clus102343_Contig1 | ---NA---                                                                                   | 431 | 0 - | -        |        |  |
| 2224 | Cl_clus102339_Contig1 | ---NA---                                                                                   | 223 | 0 - | -        |        |  |
| 2225 | Cl_clus102344_Contig1 | ---NA---                                                                                   | 352 | 0 - | -        |        |  |
| 2226 | Cl_clus102345_Contig1 | ---NA---                                                                                   | 262 | 0 - | -        |        |  |
| 2227 | Cl_clus102346_Contig1 | ---NA---                                                                                   | 247 | 0 - | -        |        |  |
| 2228 | Cl_clus102347_Contig1 | ---NA---                                                                                   | 240 | 0 - | -        |        |  |
| 2229 | Cl_clus102348_Contig1 | ---NA---                                                                                   | 228 | 0 - | -        |        |  |
| 2230 | Cl_clus102349_Contig1 | ---NA---                                                                                   | 377 | 0 - | -        |        |  |
| 2231 | Cl_clus102337_Contig1 | ---NA---                                                                                   | 302 | 0 - | -        |        |  |
| 2232 | Cl_clus102350_Contig1 | ---NA---                                                                                   | 308 | 0 - | -        |        |  |
| 2233 | Cl_clus102351_Contig1 | ---NA---                                                                                   | 513 | 0 - | -        |        |  |
| 2234 | Cl_clus102352_Contig1 | ---NA---                                                                                   | 462 | 0 - | -        |        |  |
| 2235 | Cl_clus102353_Contig1 | ---NA---                                                                                   | 308 | 0 - | -        |        |  |
| 2236 | Cl_clus102354_Contig1 | ---NA---                                                                                   | 483 | 0 - | -        |        |  |
| 2237 | Cl_clus102355_Contig1 | osmerus mordax clone omor-eva-518-227 40s ribosomal protein s3<br>complete cds             | 257 | 20  | 1.60E-69 | 81.00% |  |
| 2238 | Cl_clus102356_Contig1 | ---NA---                                                                                   | 397 | 0 - | -        |        |  |
| 2239 | Cl_clus102357_Contig1 | ---NA---                                                                                   | 338 | 0 - | -        |        |  |
| 2240 | Cl_clus102358_Contig1 | ---NA---                                                                                   | 327 | 0 - | -        |        |  |
| 2241 | Cl_clus102359_Contig1 | ---NA---                                                                                   | 346 | 0 - | -        |        |  |
| 2242 | Cl_clus102360_Contig1 | ---NA---                                                                                   | 338 | 0 - | -        |        |  |
| 2243 | Cl_clus102361_Contig1 | ---NA---                                                                                   | 255 | 0 - | -        |        |  |
| 2244 | Cl_clus102362_Contig1 | ---NA---                                                                                   | 478 | 0 - | -        |        |  |
| 2245 | Cl_clus102364_Contig1 | ---NA---                                                                                   | 239 | 0 - | -        |        |  |
| 2246 | Cl_clus102365_Contig1 | ---NA---                                                                                   | 476 | 0 - | -        |        |  |
| 2247 | Cl_clus102366_Contig1 | ---NA---                                                                                   | 344 | 0 - | -        |        |  |
| 2248 | Cl_clus102367_Contig1 | ---NA---                                                                                   | 781 | 0 - | -        |        |  |
| 2249 | Cl_clus102368_Contig1 | ---NA---                                                                                   | 333 | 0 - | -        |        |  |
| 2250 | Cl_clus102370_Contig1 | arabidopsis thaliana photosystem ii type i chlorophyll a b binding<br>protein complete cds | 224 | 20  | 2.80E-97 | 95.00% |  |
| 2251 | Cl_clus102371_Contig1 | ixodes pacificus clone ip_7_60_92_475_clu ribosomal protein l41<br>complete cds            | 293 | 3   | 9.10E-23 | 92.00% |  |
| 2252 | Cl_clus102372_Contig1 | ---NA---                                                                                   | 259 | 0 - | -        |        |  |
| 2253 | Cl_clus102373_Contig1 | ---NA---                                                                                   | 362 | 0 - | -        |        |  |
| 2254 | Cl_clus102374_Contig1 | ---NA---                                                                                   | 240 | 0 - | -        |        |  |
| 2255 | Cl_clus102375_Contig1 | ---NA---                                                                                   | 205 | 0 - | -        |        |  |
| 2256 | Cl_clus102376_Contig1 | ---NA---                                                                                   | 276 | 0 - | -        |        |  |

|      |                       |                                                                                        |     |    |           |        |  |
|------|-----------------------|----------------------------------------------------------------------------------------|-----|----|-----------|--------|--|
| 2257 | Cl_clus102377_Contig1 | ---NA---                                                                               | 303 | 0  | -         | -      |  |
| 2258 | Cl_clus102378_Contig1 | ---NA---                                                                               | 530 | 0  | -         | -      |  |
| 2259 | Cl_clus102379_Contig1 | ---NA---                                                                               | 341 | 0  | -         | -      |  |
| 2260 | Cl_clus102381_Contig1 | ---NA---                                                                               | 229 | 0  | -         | -      |  |
| 2261 | Cl_clus102382_Contig1 | ---NA---                                                                               | 656 | 0  | -         | -      |  |
| 2262 | Cl_clus102383_Contig1 | ---NA---                                                                               | 205 | 0  | -         | -      |  |
| 2263 | Cl_clus102384_Contig1 | ---NA---                                                                               | 287 | 0  | -         | -      |  |
| 2264 | Cl_clus102385_Contig1 | ---NA---                                                                               | 320 | 0  | -         | -      |  |
| 2265 | Cl_clus102386_Contig1 | ---NA---                                                                               | 210 | 0  | -         | -      |  |
| 2266 | Cl_clus102387_Contig1 | ---NA---                                                                               | 270 | 0  | -         | -      |  |
| 2267 | Cl_clus102388_Contig1 | ---NA---                                                                               | 256 | 0  | -         | -      |  |
| 2268 | Cl_clus102389_Contig1 | ---NA---                                                                               | 393 | 0  | -         | -      |  |
| 2269 | Cl_clus102390_Contig1 | ---NA---                                                                               | 221 | 0  | -         | -      |  |
| 2270 | Cl_clus102391_Contig1 | ---NA---                                                                               | 327 | 0  | -         | -      |  |
| 2271 | Cl_clus102392_Contig1 | ---NA---                                                                               | 336 | 0  | -         | -      |  |
| 2272 | Cl_clus102393_Contig1 | ---NA---                                                                               | 811 | 0  | -         | -      |  |
| 2273 | Cl_clus102394_Contig1 | ---NA---                                                                               | 484 | 0  | -         | -      |  |
| 2274 | Cl_clus102395_Contig1 | ---NA---                                                                               | 498 | 0  | -         | -      |  |
| 2275 | Cl_clus102396_Contig1 | ---NA---                                                                               | 258 | 0  | -         | -      |  |
| 2276 | Cl_clus102398_Contig1 | ---NA---                                                                               | 308 | 0  | -         | -      |  |
| 2277 | Cl_clus102401_Contig1 | ---NA---                                                                               | 476 | 0  | -         | -      |  |
| 2278 | Cl_clus102403_Contig1 | ---NA---                                                                               | 251 | 0  | -         | -      |  |
| 2279 | Cl_clus102404_Contig1 | ---NA---                                                                               | 259 | 0  | -         | -      |  |
| 2280 | Cl_clus102405_Contig1 | ---NA---                                                                               | 374 | 0  | -         | -      |  |
| 2281 | Cl_clus102406_Contig1 | ---NA---                                                                               | 403 | 0  | -         | -      |  |
| 2282 | Cl_clus102407_Contig1 | ---NA---                                                                               | 206 | 0  | -         | -      |  |
| 2283 | Cl_clus102408_Contig1 | ---NA---                                                                               | 384 | 0  | -         | -      |  |
| 2284 | Cl_clus102409_Contig1 | ---NA---                                                                               | 394 | 0  | -         | -      |  |
| 2285 | Cl_clus102410_Contig1 | ---NA---                                                                               | 327 | 0  | -         | -      |  |
| 2286 | Cl_clus102411_Contig1 | ---NA---                                                                               | 214 | 0  | -         | -      |  |
|      |                       |                                                                                        |     |    |           |        |  |
| 2287 | Cl_clus102412_Contig1 | ---NA---                                                                               | 355 | 0  | -         | -      |  |
| 2288 | Cl_clus102414_Contig1 | ---NA---                                                                               | 396 | 0  | -         | -      |  |
| 2289 | Cl_clus102416_Contig1 | ---NA---                                                                               | 205 | 0  | -         | -      |  |
| 2290 | Cl_clus102413_Contig1 | ---NA---                                                                               | 382 | 0  | -         | -      |  |
| 2291 | Cl_clus102418_Contig1 | ---NA---                                                                               | 221 | 0  | -         | -      |  |
| 2292 | Cl_clus102419_Contig1 | ---NA---                                                                               | 333 | 0  | -         | -      |  |
| 2293 | Cl_clus102422_Contig1 | ---NA---                                                                               | 396 | 0  | -         | -      |  |
| 2294 | Cl_clus102424_Contig1 | ---NA---                                                                               | 333 | 0  | -         | -      |  |
| 2295 | Cl_clus102425_Contig1 | ---NA---                                                                               | 248 | 0  | -         | -      |  |
| 2296 | Cl_clus102427_Contig1 | ---NA---                                                                               | 533 | 0  | -         | -      |  |
| 2297 | Cl_clus102428_Contig1 | ---NA---                                                                               | 464 | 0  | -         | -      |  |
| 2298 | Cl_clus102429_Contig1 | ---NA---                                                                               | 276 | 0  | -         | -      |  |
| 2299 | Cl_clus102431_Contig1 | ---NA---                                                                               | 329 | 0  | -         | -      |  |
| 2300 | Cl_clus102432_Contig1 | ---NA---                                                                               | 218 | 0  | -         | -      |  |
| 2301 | Cl_clus102430_Contig1 | ---NA---                                                                               | 282 | 0  | -         | -      |  |
| 2302 | Cl_clus102433_Contig1 | ---NA---                                                                               | 277 | 0  | -         | -      |  |
| 2303 | Cl_clus102434_Contig1 | ---NA---                                                                               | 201 | 0  | -         | -      |  |
| 2304 | Cl_clus102436_Contig1 | ---NA---                                                                               | 761 | 0  | -         | -      |  |
| 2305 | Cl_clus102437_Contig1 | ---NA---                                                                               | 224 | 0  | -         | -      |  |
| 2306 | Cl_clus102439_Contig1 | ---NA---                                                                               | 418 | 0  | -         | -      |  |
| 2307 | Cl_clus102440_Contig1 | ---NA---                                                                               | 306 | 0  | -         | -      |  |
| 2308 | Cl_clus102438_Contig1 | ---NA---                                                                               | 202 | 0  | -         | -      |  |
| 2309 | Cl_clus102442_Contig1 | megachile rotundata f-box only protein 28-like mrna                                    | 391 | 1  | 2.90E-43  | 84.00% |  |
| 2310 | Cl_clus102443_Contig1 | ---NA---                                                                               | 448 | 0  | -         | -      |  |
| 2311 | Cl_clus102444_Contig1 | ---NA---                                                                               | 316 | 0  | -         | -      |  |
| 2312 | Cl_clus102445_Contig1 | drosophila melanogaster heat shock protein cognate 3 (hsc70-3) transcript variant mrna | 526 | 20 | 8.90E-134 | 79.30% |  |
| 2313 | Cl_clus102446_Contig1 | ---NA---                                                                               | 255 | 0  | -         | -      |  |
| 2314 | Cl_clus102447_Contig1 | ---NA---                                                                               | 342 | 0  | -         | -      |  |
| 2315 | Cl_clus102449_Contig1 | ---NA---                                                                               | 215 | 0  | -         | -      |  |



|      |                       |                                                                              |     |    |           |        |  |
|------|-----------------------|------------------------------------------------------------------------------|-----|----|-----------|--------|--|
| 2316 | Cl_clus102450_Contig1 | ---NA---                                                                     | 457 | 0  | -         | -      |  |
| 2317 | Cl_clus102452_Contig1 | ---NA---                                                                     | 425 | 0  | -         | -      |  |
| 2318 | Cl_clus102453_Contig1 | ---NA---                                                                     | 490 | 0  | -         | -      |  |
| 2319 | Cl_clus102454_Contig1 | ---NA---                                                                     | 395 | 0  | -         | -      |  |
| 2320 | Cl_clus102455_Contig1 | ---NA---                                                                     | 313 | 0  | -         | -      |  |
| 2321 | Cl_clus102451_Contig1 | ---NA---                                                                     | 256 | 0  | -         | -      |  |
| 2322 | Cl_clus102456_Contig1 | ---NA---                                                                     | 312 | 0  | -         | -      |  |
| 2323 | Cl_clus102458_Contig1 | ---NA---                                                                     | 215 | 0  | -         | -      |  |
| 2324 | Cl_clus102461_Contig1 | ---NA---                                                                     | 261 | 0  | -         | -      |  |
| 2325 | Cl_clus102462_Contig1 | ---NA---                                                                     | 616 | 0  | -         | -      |  |
| 2326 | Cl_clus102463_Contig1 | ---NA---                                                                     | 345 | 0  | -         | -      |  |
| 2327 | Cl_clus102464_Contig1 | ---NA---                                                                     | 260 | 0  | -         | -      |  |
| 2328 | Cl_clus102465_Contig1 | ---NA---                                                                     | 477 | 0  | -         | -      |  |
| 2329 | Cl_clus102466_Contig1 | ---NA---                                                                     | 376 | 0  | -         | -      |  |
| 2330 | Cl_clus102467_Contig1 | ---NA---                                                                     | 456 | 0  | -         | -      |  |
| 2331 | Cl_clus102468_Contig1 | ---NA---                                                                     | 312 | 0  | -         | -      |  |
| 2332 | Cl_clus102469_Contig1 | ---NA---                                                                     | 404 | 0  | -         | -      |  |
| 2333 | Cl_clus102470_Contig1 | ---NA---                                                                     | 257 | 0  | -         | -      |  |
| 2334 | Cl_clus102472_Contig1 | ---NA---                                                                     | 337 | 0  | -         | -      |  |
| 2335 | Cl_clus102473_Contig1 | ---NA---                                                                     | 424 | 0  | -         | -      |  |
| 2336 | Cl_clus102474_Contig1 | ---NA---                                                                     | 354 | 0  | -         | -      |  |
| 2337 | Cl_clus102475_Contig1 | ---NA---                                                                     | 358 | 0  | -         | -      |  |
| 2338 | Cl_clus102476_Contig1 | ---NA---                                                                     | 512 | 0  | -         | -      |  |
| 2339 | Cl_clus102477_Contig1 | ---NA---                                                                     | 453 | 0  | -         | -      |  |
| 2340 | Cl_clus102478_Contig1 | ---NA---                                                                     | 352 | 0  | -         | -      |  |
| 2341 | Cl_clus102479_Contig1 | ---NA---                                                                     | 355 | 0  | -         | -      |  |
| 2342 | Cl_clus102480_Contig1 | ---NA---                                                                     | 392 | 0  | -         | -      |  |
| 2343 | Cl_clus102481_Contig1 | ---NA---                                                                     | 262 | 0  | -         | -      |  |
| 2344 | Cl_clus102482_Contig1 | ---NA---                                                                     | 366 | 0  | -         | -      |  |
| 2345 | Cl_clus102484_Contig1 | ---NA---                                                                     | 427 | 0  | -         | -      |  |
|      |                       |                                                                              |     |    |           |        |  |
| 2346 | Cl_clus102486_Contig1 | ---NA---                                                                     | 382 | 0  | -         | -      |  |
| 2347 | Cl_clus102488_Contig1 | ---NA---                                                                     | 320 | 0  | -         | -      |  |
| 2348 | Cl_clus102487_Contig1 | ---NA---                                                                     | 322 | 0  | -         | -      |  |
| 2349 | Cl_clus102489_Contig1 | ---NA---                                                                     | 586 | 0  | -         | -      |  |
| 2350 | Cl_clus102490_Contig1 | ---NA---                                                                     | 376 | 0  | -         | -      |  |
| 2351 | Cl_clus102491_Contig1 | acartia pacifica clone acapa-cdna37-1 60s ribosomal protein l15 complete cds | 363 | 10 | 4.60E-34  | 74.40% |  |
| 2352 | Cl_clus102492_Contig1 | ---NA---                                                                     | 384 | 0  | -         | -      |  |
| 2353 | Cl_clus102493_Contig1 | ---NA---                                                                     | 341 | 0  | -         | -      |  |
| 2354 | Cl_clus102495_Contig1 | anopheles gambiae pest agap012048-pa complete cds                            | 534 | 2  | 9.60E-140 | 77.50% |  |
| 2355 | Cl_clus102496_Contig1 | ---NA---                                                                     | 400 | 0  | -         | -      |  |
| 2356 | Cl_clus102494_Contig1 | ---NA---                                                                     | 393 | 0  | -         | -      |  |
| 2357 | Cl_clus102497_Contig1 | ---NA---                                                                     | 498 | 0  | -         | -      |  |
| 2358 | Cl_clus102498_Contig1 | ---NA---                                                                     | 561 | 0  | -         | -      |  |
| 2359 | Cl_clus102502_Contig1 | ---NA---                                                                     | 502 | 0  | -         | -      |  |
| 2360 | Cl_clus102501_Contig1 | ---NA---                                                                     | 343 | 0  | -         | -      |  |
| 2361 | Cl_clus102503_Contig1 | ---NA---                                                                     | 247 | 0  | -         | -      |  |
| 2362 | Cl_clus102504_Contig1 | aedes aegypti mitochondrial processing peptidase beta subunit partial mrna   | 455 | 5  | 1.60E-66  | 73.40% |  |
| 2363 | Cl_clus102505_Contig1 | ---NA---                                                                     | 584 | 0  | -         | -      |  |
| 2364 | Cl_clus102506_Contig1 | ---NA---                                                                     | 386 | 0  | -         | -      |  |
| 2365 | Cl_clus102507_Contig1 | ---NA---                                                                     | 356 | 0  | -         | -      |  |
| 2366 | Cl_clus102508_Contig1 | ---NA---                                                                     | 476 | 0  | -         | -      |  |
| 2367 | Cl_clus102509_Contig1 | ---NA---                                                                     | 265 | 0  | -         | -      |  |
| 2368 | Cl_clus102510_Contig1 | ---NA---                                                                     | 356 | 0  | -         | -      |  |
| 2369 | Cl_clus102511_Contig1 | maylandia zebra catalase-like mrna                                           | 340 | 6  | 2.40E-56  | 76.50% |  |
| 2370 | Cl_clus102513_Contig1 | ---NA---                                                                     | 393 | 0  | -         | -      |  |
| 2371 | Cl_clus102512_Contig1 | ---NA---                                                                     | 276 | 0  | -         | -      |  |
| 2372 | Cl_clus102515_Contig1 | ---NA---                                                                     | 387 | 0  | -         | -      |  |
| 2373 | Cl_clus102516_Contig1 | ---NA---                                                                     | 240 | 0  | -         | -      |  |

|      |                       |                                                       |     |   |          |   |        |
|------|-----------------------|-------------------------------------------------------|-----|---|----------|---|--------|
| 2374 | Cl_clus102517_Contig1 | ---NA---                                              | 352 | 0 | -        | - |        |
| 2375 | Cl_clus102518_Contig1 | ---NA---                                              | 282 | 0 | -        | - |        |
| 2376 | Cl_clus102519_Contig1 | ---NA---                                              | 254 | 0 | -        | - |        |
| 2377 | Cl_clus102514_Contig1 | ---NA---                                              | 320 | 0 | -        | - |        |
| 2378 | Cl_clus102499_Contig1 | ---NA---                                              | 242 | 0 | -        | - |        |
| 2379 | Cl_clus102483_Contig1 | ---NA---                                              | 321 | 0 | -        | - |        |
| 2380 | Cl_clus102471_Contig1 | ---NA---                                              | 290 | 0 | -        | - |        |
| 2381 | Cl_clus102520_Contig1 | ---NA---                                              | 241 | 0 | -        | - |        |
| 2382 | Cl_clus102521_Contig1 | ---NA---                                              | 230 | 0 | -        | - |        |
| 2383 | Cl_clus102522_Contig1 | aplysia californica nadh dehydrogenase                | 682 | 1 | 5.70E-87 |   | 74.00% |
| 2384 | Cl_clus102523_Contig1 | ---NA---                                              | 553 | 0 | -        | - |        |
| 2385 | Cl_clus102525_Contig1 | homarus americanus troponin c isoform 2a complete cds | 713 | 1 | 2.70E-34 |   | 73.00% |
| 2386 | Cl_clus102526_Contig1 | ---NA---                                              | 381 | 0 | -        | - |        |
| 2387 | Cl_clus102528_Contig1 | ---NA---                                              | 474 | 0 | -        | - |        |
| 2388 | Cl_clus102529_Contig1 | jakoba bahamiensis strain atcc 50695 complete genome  | 249 | 2 | 8.60E-35 |   | 75.00% |
| 2389 | Cl_clus102530_Contig1 | ---NA---                                              | 430 | 0 | -        | - |        |
| 2390 | Cl_clus102531_Contig1 | ---NA---                                              | 286 | 0 | -        | - |        |
| 2391 | Cl_clus102532_Contig1 | ---NA---                                              | 599 | 0 | -        | - |        |
| 2392 | Cl_clus102533_Contig1 | ---NA---                                              | 283 | 0 | -        | - |        |
| 2393 | Cl_clus102534_Contig1 | ---NA---                                              | 471 | 0 | -        | - |        |
| 2394 | Cl_clus102535_Contig1 | ---NA---                                              | 483 | 0 | -        | - |        |
| 2395 | Cl_clus102536_Contig1 | ---NA---                                              | 401 | 0 | -        | - |        |
| 2396 | Cl_clus102537_Contig1 | ---NA---                                              | 232 | 0 | -        | - |        |
| 2397 | Cl_clus102539_Contig1 | ---NA---                                              | 266 | 0 | -        | - |        |
| 2398 | Cl_clus102540_Contig1 | ---NA---                                              | 443 | 0 | -        | - |        |
| 2399 | Cl_clus102538_Contig1 | ---NA---                                              | 231 | 0 | -        | - |        |
| 2400 | Cl_clus102541_Contig1 | ---NA---                                              | 298 | 0 | -        | - |        |
| 2401 | Cl_clus102542_Contig1 | ---NA---                                              | 543 | 0 | -        | - |        |
| 2402 | Cl_clus102543_Contig1 | ---NA---                                              | 250 | 0 | -        | - |        |
| 2403 | Cl_clus102544_Contig1 | ---NA---                                              | 302 | 0 | -        | - |        |

|      |                       |                                                              |      |    |          |   |        |
|------|-----------------------|--------------------------------------------------------------|------|----|----------|---|--------|
| 2404 | Cl_clus102545_Contig1 | ---NA---                                                     | 536  | 0  | -        | - |        |
| 2405 | Cl_clus102546_Contig1 | ---NA---                                                     | 367  | 0  | -        | - |        |
| 2406 | Cl_clus102547_Contig1 | ---NA---                                                     | 208  | 0  | -        | - |        |
| 2407 | Cl_clus102548_Contig1 | ---NA---                                                     | 482  | 0  | -        | - |        |
| 2408 | Cl_clus102549_Contig1 | ---NA---                                                     | 296  | 0  | -        | - |        |
| 2409 | Cl_clus102550_Contig1 | ---NA---                                                     | 216  | 0  | -        | - |        |
| 2410 | Cl_clus102551_Contig1 | ---NA---                                                     | 206  | 0  | -        | - |        |
| 2411 | Cl_clus102552_Contig1 | ---NA---                                                     | 410  | 0  | -        | - |        |
| 2412 | Cl_clus102553_Contig1 | ---NA---                                                     | 460  | 0  | -        | - |        |
| 2413 | Cl_clus102554_Contig1 | ---NA---                                                     | 1501 | 0  | -        | - |        |
| 2414 | Cl_clus102557_Contig1 | ---NA---                                                     | 286  | 0  | -        | - |        |
| 2415 | Cl_clus102558_Contig1 | ---NA---                                                     | 386  | 0  | -        | - |        |
| 2416 | Cl_clus102559_Contig1 | ---NA---                                                     | 283  | 0  | -        | - |        |
| 2417 | Cl_clus102560_Contig1 | ---NA---                                                     | 367  | 0  | -        | - |        |
| 2418 | Cl_clus102561_Contig1 | ---NA---                                                     | 431  | 0  | -        | - |        |
| 2419 | Cl_clus102563_Contig1 | ---NA---                                                     | 234  | 0  | -        | - |        |
| 2420 | Cl_clus102562_Contig1 | ---NA---                                                     | 346  | 0  | -        | - |        |
| 2421 | Cl_clus102564_Contig1 | ---NA---                                                     | 232  | 0  | -        | - |        |
| 2422 | Cl_clus102565_Contig1 | ---NA---                                                     | 353  | 0  | -        | - |        |
| 2423 | Cl_clus102566_Contig1 | ---NA---                                                     | 423  | 0  | -        | - |        |
| 2424 | Cl_clus102567_Contig1 | ---NA---                                                     | 346  | 0  | -        | - |        |
| 2425 | Cl_clus102568_Contig1 | ---NA---                                                     | 325  | 0  | -        | - |        |
| 2426 | Cl_clus102570_Contig1 | ---NA---                                                     | 241  | 0  | -        | - |        |
| 2427 | Cl_clus102571_Contig1 | ---NA---                                                     | 329  | 0  | -        | - |        |
| 2428 | Cl_clus102572_Contig1 | ---NA---                                                     | 434  | 0  | -        | - |        |
| 2429 | Cl_clus102573_Contig1 | nomascus leucogenys s-phase kinase-associated protein 1 mrna | 217  | 20 | 2.10E-54 |   | 82.00% |
| 2430 | Cl_clus102574_Contig1 | ---NA---                                                     | 332  | 0  | -        | - |        |
| 2431 | Cl_clus102575_Contig1 | ---NA---                                                     | 341  | 0  | -        | - |        |
| 2432 | Cl_clus102576_Contig1 | ---NA---                                                     | 315  | 0  | -        | - |        |
| 2433 | Cl_clus102577_Contig1 | ---NA---                                                     | 257  | 0  | -        | - |        |

|      |                       |                                                        |     |    |          |        |  |
|------|-----------------------|--------------------------------------------------------|-----|----|----------|--------|--|
| 2434 | Cl_clus102578_Contig1 | ---NA---                                               | 313 | 0  | -        | -      |  |
| 2435 | Cl_clus102579_Contig1 | ---NA---                                               | 210 | 0  | -        | -      |  |
| 2436 | Cl_clus102580_Contig1 | ---NA---                                               | 363 | 0  | -        | -      |  |
| 2437 | Cl_clus102581_Contig1 | plathemis lydia voucher atp synthase partial cds       | 334 | 14 | 6.60E-95 | 80.86% |  |
| 2438 | Cl_clus102582_Contig1 | ---NA---                                               | 392 | 0  | -        | -      |  |
| 2439 | Cl_clus102583_Contig1 | ---NA---                                               | 309 | 0  | -        | -      |  |
| 2440 | Cl_clus102584_Contig1 | ---NA---                                               | 615 | 0  | -        | -      |  |
| 2441 | Cl_clus102585_Contig1 | ---NA---                                               | 397 | 0  | -        | -      |  |
| 2442 | Cl_clus102586_Contig1 | ---NA---                                               | 276 | 0  | -        | -      |  |
| 2443 | Cl_clus102587_Contig1 | ---NA---                                               | 275 | 0  | -        | -      |  |
| 2444 | Cl_clus102588_Contig1 | ---NA---                                               | 224 | 0  | -        | -      |  |
| 2445 | Cl_clus102589_Contig1 | ---NA---                                               | 437 | 0  | -        | -      |  |
| 2446 | Cl_clus102591_Contig1 | ---NA---                                               | 319 | 0  | -        | -      |  |
| 2447 | Cl_clus102592_Contig1 | ---NA---                                               | 210 | 0  | -        | -      |  |
| 2448 | Cl_clus102593_Contig1 | ---NA---                                               | 291 | 0  | -        | -      |  |
| 2449 | Cl_clus102594_Contig1 | ---NA---                                               | 271 | 0  | -        | -      |  |
| 2450 | Cl_clus102590_Contig1 | ---NA---                                               | 460 | 0  | -        | -      |  |
| 2451 | Cl_clus102595_Contig1 | ---NA---                                               | 288 | 0  | -        | -      |  |
| 2452 | Cl_clus102596_Contig1 | ---NA---                                               | 269 | 0  | -        | -      |  |
| 2453 | Cl_clus102597_Contig1 | ---NA---                                               | 499 | 0  | -        | -      |  |
| 2454 | Cl_clus102598_Contig1 | ---NA---                                               | 502 | 0  | -        | -      |  |
| 2455 | Cl_clus102599_Contig1 | ---NA---                                               | 315 | 0  | -        | -      |  |
| 2456 | Cl_clus102600_Contig1 | drosophila melanogaster desat1 transcript variant mrna | 397 | 17 | 2.40E-44 | 74.24% |  |
| 2457 | Cl_clus102601_Contig1 | ---NA---                                               | 445 | 0  | -        | -      |  |
| 2458 | Cl_clus102603_Contig1 | ---NA---                                               | 272 | 0  | -        | -      |  |
| 2459 | Cl_clus102604_Contig1 | ---NA---                                               | 235 | 0  | -        | -      |  |
| 2460 | Cl_clus102605_Contig1 | ---NA---                                               | 376 | 0  | -        | -      |  |
| 2461 | Cl_clus102606_Contig1 | ---NA---                                               | 343 | 0  | -        | -      |  |
| 2462 | Cl_clus102607_Contig1 | ---NA---                                               | 303 | 0  | -        | -      |  |
| 2463 | Cl_clus102608_Contig1 | ---NA---                                               | 222 | 0  | -        | -      |  |

|      |                       |                                                      |     |    |           |        |  |
|------|-----------------------|------------------------------------------------------|-----|----|-----------|--------|--|
| 2464 | Cl_clus102609_Contig1 | ---NA---                                             | 202 | 0  | -         | -      |  |
| 2465 | Cl_clus102610_Contig1 | ---NA---                                             | 303 | 0  | -         | -      |  |
| 2466 | Cl_clus102611_Contig1 | ---NA---                                             | 205 | 0  | -         | -      |  |
| 2467 | Cl_clus102612_Contig1 | ---NA---                                             | 420 | 0  | -         | -      |  |
| 2468 | Cl_clus102613_Contig1 | ---NA---                                             | 233 | 0  | -         | -      |  |
| 2469 | Cl_clus102614_Contig1 | ---NA---                                             | 398 | 0  | -         | -      |  |
| 2470 | Cl_clus102615_Contig1 | ---NA---                                             | 274 | 0  | -         | -      |  |
| 2471 | Cl_clus102616_Contig1 | ---NA---                                             | 362 | 0  | -         | -      |  |
| 2472 | Cl_clus102617_Contig1 | ---NA---                                             | 801 | 0  | -         | -      |  |
| 2473 | Cl_clus102618_Contig1 | ---NA---                                             | 620 | 0  | -         | -      |  |
| 2474 | Cl_clus102619_Contig1 | ---NA---                                             | 311 | 0  | -         | -      |  |
| 2475 | Cl_clus102620_Contig1 | ---NA---                                             | 339 | 0  | -         | -      |  |
| 2476 | Cl_clus102621_Contig1 | ---NA---                                             | 415 | 0  | -         | -      |  |
| 2477 | Cl_clus102622_Contig1 | ---NA---                                             | 471 | 0  | -         | -      |  |
| 2478 | Cl_clus102623_Contig1 | ---NA---                                             | 427 | 0  | -         | -      |  |
| 2479 | Cl_clus102624_Contig1 | ---NA---                                             | 453 | 0  | -         | -      |  |
| 2480 | Cl_clus102625_Contig1 | ---NA---                                             | 300 | 0  | -         | -      |  |
| 2481 | Cl_clus102626_Contig1 | ---NA---                                             | 497 | 0  | -         | -      |  |
| 2482 | Cl_clus102627_Contig1 | ---NA---                                             | 522 | 0  | -         | -      |  |
| 2483 | Cl_clus102628_Contig1 | ---NA---                                             | 219 | 0  | -         | -      |  |
| 2484 | Cl_clus102629_Contig1 | ---NA---                                             | 287 | 0  | -         | -      |  |
| 2485 | Cl_clus102630_Contig1 | ---NA---                                             | 306 | 0  | -         | -      |  |
| 2486 | Cl_clus102632_Contig1 | ---NA---                                             | 452 | 0  | -         | -      |  |
| 2487 | Cl_clus102633_Contig1 | ---NA---                                             | 440 | 0  | -         | -      |  |
| 2488 | Cl_clus102634_Contig1 | ---NA---                                             | 725 | 0  | -         | -      |  |
| 2489 | Cl_clus102635_Contig1 | arabidopsis thaliana at1g29930 f1n18_23 complete cds | 300 | 20 | 2.20E-138 | 92.95% |  |
| 2490 | Cl_clus102637_Contig1 | ---NA---                                             | 500 | 0  | -         | -      |  |
| 2491 | Cl_clus102639_Contig1 | ---NA---                                             | 276 | 0  | -         | -      |  |
| 2492 | Cl_clus102640_Contig1 | ---NA---                                             | 217 | 0  | -         | -      |  |
| 2493 | Cl_clus102641_Contig1 | ---NA---                                             | 254 | 0  | -         | -      |  |

|      |                       |          |     |   |   |   |
|------|-----------------------|----------|-----|---|---|---|
| 2494 | Cl_clus102642_Contig1 | ---NA--- | 202 | 0 | - | - |
| 2495 | Cl_clus102643_Contig1 | ---NA--- | 277 | 0 | - | - |
| 2496 | Cl_clus102644_Contig1 | ---NA--- | 343 | 0 | - | - |
| 2497 | Cl_clus102645_Contig1 | ---NA--- | 440 | 0 | - | - |
| 2498 | Cl_clus102646_Contig1 | ---NA--- | 329 | 0 | - | - |
| 2499 | Cl_clus102647_Contig1 | ---NA--- | 330 | 0 | - | - |
| 2500 | Cl_clus102649_Contig1 | ---NA--- | 340 | 0 | - | - |
| 2501 | Cl_clus102650_Contig1 | ---NA--- | 281 | 0 | - | - |
| 2502 | Cl_clus102652_Contig1 | ---NA--- | 321 | 0 | - | - |
| 2503 | Cl_clus102651_Contig1 | ---NA--- | 323 | 0 | - | - |
| 2504 | Cl_clus102654_Contig1 | ---NA--- | 422 | 0 | - | - |
| 2505 | Cl_clus102653_Contig1 | ---NA--- | 215 | 0 | - | - |
| 2506 | Cl_clus102655_Contig1 | ---NA--- | 353 | 0 | - | - |
| 2507 | Cl_clus102658_Contig1 | ---NA--- | 246 | 0 | - | - |
| 2508 | Cl_clus102659_Contig1 | ---NA--- | 248 | 0 | - | - |
| 2509 | Cl_clus102660_Contig1 | ---NA--- | 547 | 0 | - | - |
| 2510 | Cl_clus102662_Contig1 | ---NA--- | 244 | 0 | - | - |
| 2511 | Cl_clus102663_Contig1 | ---NA--- | 488 | 0 | - | - |
| 2512 | Cl_clus102661_Contig1 | ---NA--- | 224 | 0 | - | - |
| 2513 | Cl_clus102664_Contig1 | ---NA--- | 332 | 0 | - | - |
| 2514 | Cl_clus102665_Contig1 | ---NA--- | 240 | 0 | - | - |
| 2515 | Cl_clus102666_Contig1 | ---NA--- | 350 | 0 | - | - |
| 2516 | Cl_clus102668_Contig1 | ---NA--- | 364 | 0 | - | - |
| 2517 | Cl_clus102669_Contig1 | ---NA--- | 364 | 0 | - | - |
| 2518 | Cl_clus102671_Contig1 | ---NA--- | 509 | 0 | - | - |
| 2519 | Cl_clus102672_Contig1 | ---NA--- | 443 | 0 | - | - |
| 2520 | Cl_clus102673_Contig1 | ---NA--- | 242 | 0 | - | - |
| 2521 | Cl_clus102675_Contig1 | ---NA--- | 305 | 0 | - | - |
| 2522 | Cl_clus102676_Contig1 | ---NA--- | 407 | 0 | - | - |
| 2523 | Cl_clus102677_Contig1 | ---NA--- | 270 | 0 | - | - |

|      |                       |                                                                                                                        |     |    |           |        |
|------|-----------------------|------------------------------------------------------------------------------------------------------------------------|-----|----|-----------|--------|
| 2524 | Cl_clus102678_Contig1 | fenneropenaeus merguensis tropomyosin complete cds                                                                     | 453 | 9  | 1.50E-117 | 80.67% |
| 2525 | Cl_clus102679_Contig1 | megachile rotundata muscle lim protein mlp84b-like mrna                                                                | 436 | 5  | 3.50E-68  | 79.00% |
| 2526 | Cl_clus102680_Contig1 | ---NA---                                                                                                               | 299 | 0  | -         | -      |
| 2527 | Cl_clus102681_Contig1 | bacillus atticus partial genome                                                                                        | 327 | 20 | 2.40E-81  | 77.05% |
| 2528 | Cl_clus102682_Contig1 | phobaeticus serratipes mitochondrial complete genome                                                                   | 225 | 20 | 4.20E-38  | 86.25% |
| 2529 | Cl_clus102683_Contig1 | ---NA---                                                                                                               | 241 | 0  | -         | -      |
| 2530 | Cl_clus102685_Contig1 | ---NA---                                                                                                               | 362 | 0  | -         | -      |
| 2531 | Cl_clus102686_Contig1 | aedes aegypti tropomyosin invertebrate partial mrna                                                                    | 331 | 20 | 5.70E-102 | 83.95% |
| 2532 | Cl_clus102687_Contig1 | ---NA---                                                                                                               | 644 | 0  | -         | -      |
| 2533 | Cl_clus102688_Contig1 | ---NA---                                                                                                               | 306 | 0  | -         | -      |
| 2534 | Cl_clus102689_Contig1 | ---NA---                                                                                                               | 485 | 0  | -         | -      |
| 2535 | Cl_clus102684_Contig1 | ---NA---                                                                                                               | 304 | 0  | -         | -      |
| 2536 | Cl_clus102690_Contig1 | papilio xuthus mrna for muscle myosin heavy complete clone: fsg31                                                      | 232 | 1  | 9.00E-47  | 79.00% |
| 2537 | Cl_clus102691_Contig2 | drosophila melanogaster myosin heavy chain transcript variant mrna                                                     | 283 | 20 | 4.20E-90  | 84.30% |
| 2538 | Cl_clus102692_Contig1 | ---NA---                                                                                                               | 203 | 0  | -         | -      |
| 2539 | Cl_clus102693_Contig1 | clitarchus hookeri voucher clh36 trna-leu partial sequence and cytochrome oxidase subunit ii partial cds mitochondrial | 774 | 20 | 0.00E+00  | 98.75% |
| 2540 | Cl_clus102694_Contig1 | nasonia vitripennis tropomyosin 1 transcript variant mrna                                                              | 600 | 20 | 5.70E-23  | 83.55% |
| 2541 | Cl_clus102695_Contig1 | extatosoma tiaratum mitochondrial complete genome                                                                      | 512 | 20 | 9.20E-140 | 76.85% |
